# Supplementary material for: Paleogeographic numerical modeling of marginal seas for the Holocene – an exemplary study of the Baltic Sea
Source: Copernicus journal article supplement (doi:10.5194/esd-16-585-2025), 2025-04-23
Supplement: Supplementary file 1 [file esd-16-585-2025-supplement.zip]

## Sheet: Arkusz1
Grud volume calculation method	Volume [m3]	Volume without porosity [m3]	Quartz_density [kg/m3]	Sediment mass [kg]	Sediment mass [t]	Annual discharge [t/yr]
Trapezoidal Rule:	1.37227e+12	5.07382e+11	2650	1.34456e+15	1.34456e+12	1.1492e+08
Simpson's Rule:	1.37228e+12	5.07394e+11	2650	1.34459e+15	1.34459e+12	1.14922e+08
Simpson's 3/8 Rule:	1.37227e+12	5.07375e+11	2650	1.34454e+15	1.34454e+12	1.14918e+08
