# Supplementary material for: Paleogeographic numerical modeling of marginal seas for the Holocene – an exemplary study of the Baltic Sea
Source: Copernicus journal article supplement (doi:10.5194/esd-16-585-2025), 2025-04-23
Supplement: Supplementary file 2 [file esd-16-585-2025-supplement.zip]

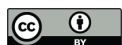

*Supplement of*

**Paleogeographic numerical modeling of marginal seas for the Holocene –  
an exemplary study of the Baltic Sea**

**Jakub Miluch et al.**

*Correspondence to:* Jakub Miluch (jmilu@pgi.gov.pl) and Wenyan Zhang (wenyan.zhang@hereon.de)

- esd-16-585-2025-supplement-title-page.pdf
- Supplement Figures.pdf
- Supplement Table\_sed\_mass\_and\_volume.xlsx

The copyright of individual parts of the supplement might differ from the article licence.
