# Supplementary figures and images for: Paleogeographic numerical modeling of marginal seas for the Holocene – an exemplary study of the Baltic Sea
Source: Copernicus journal article supplement (doi:10.5194/esd-16-585-2025), 2025-04-23

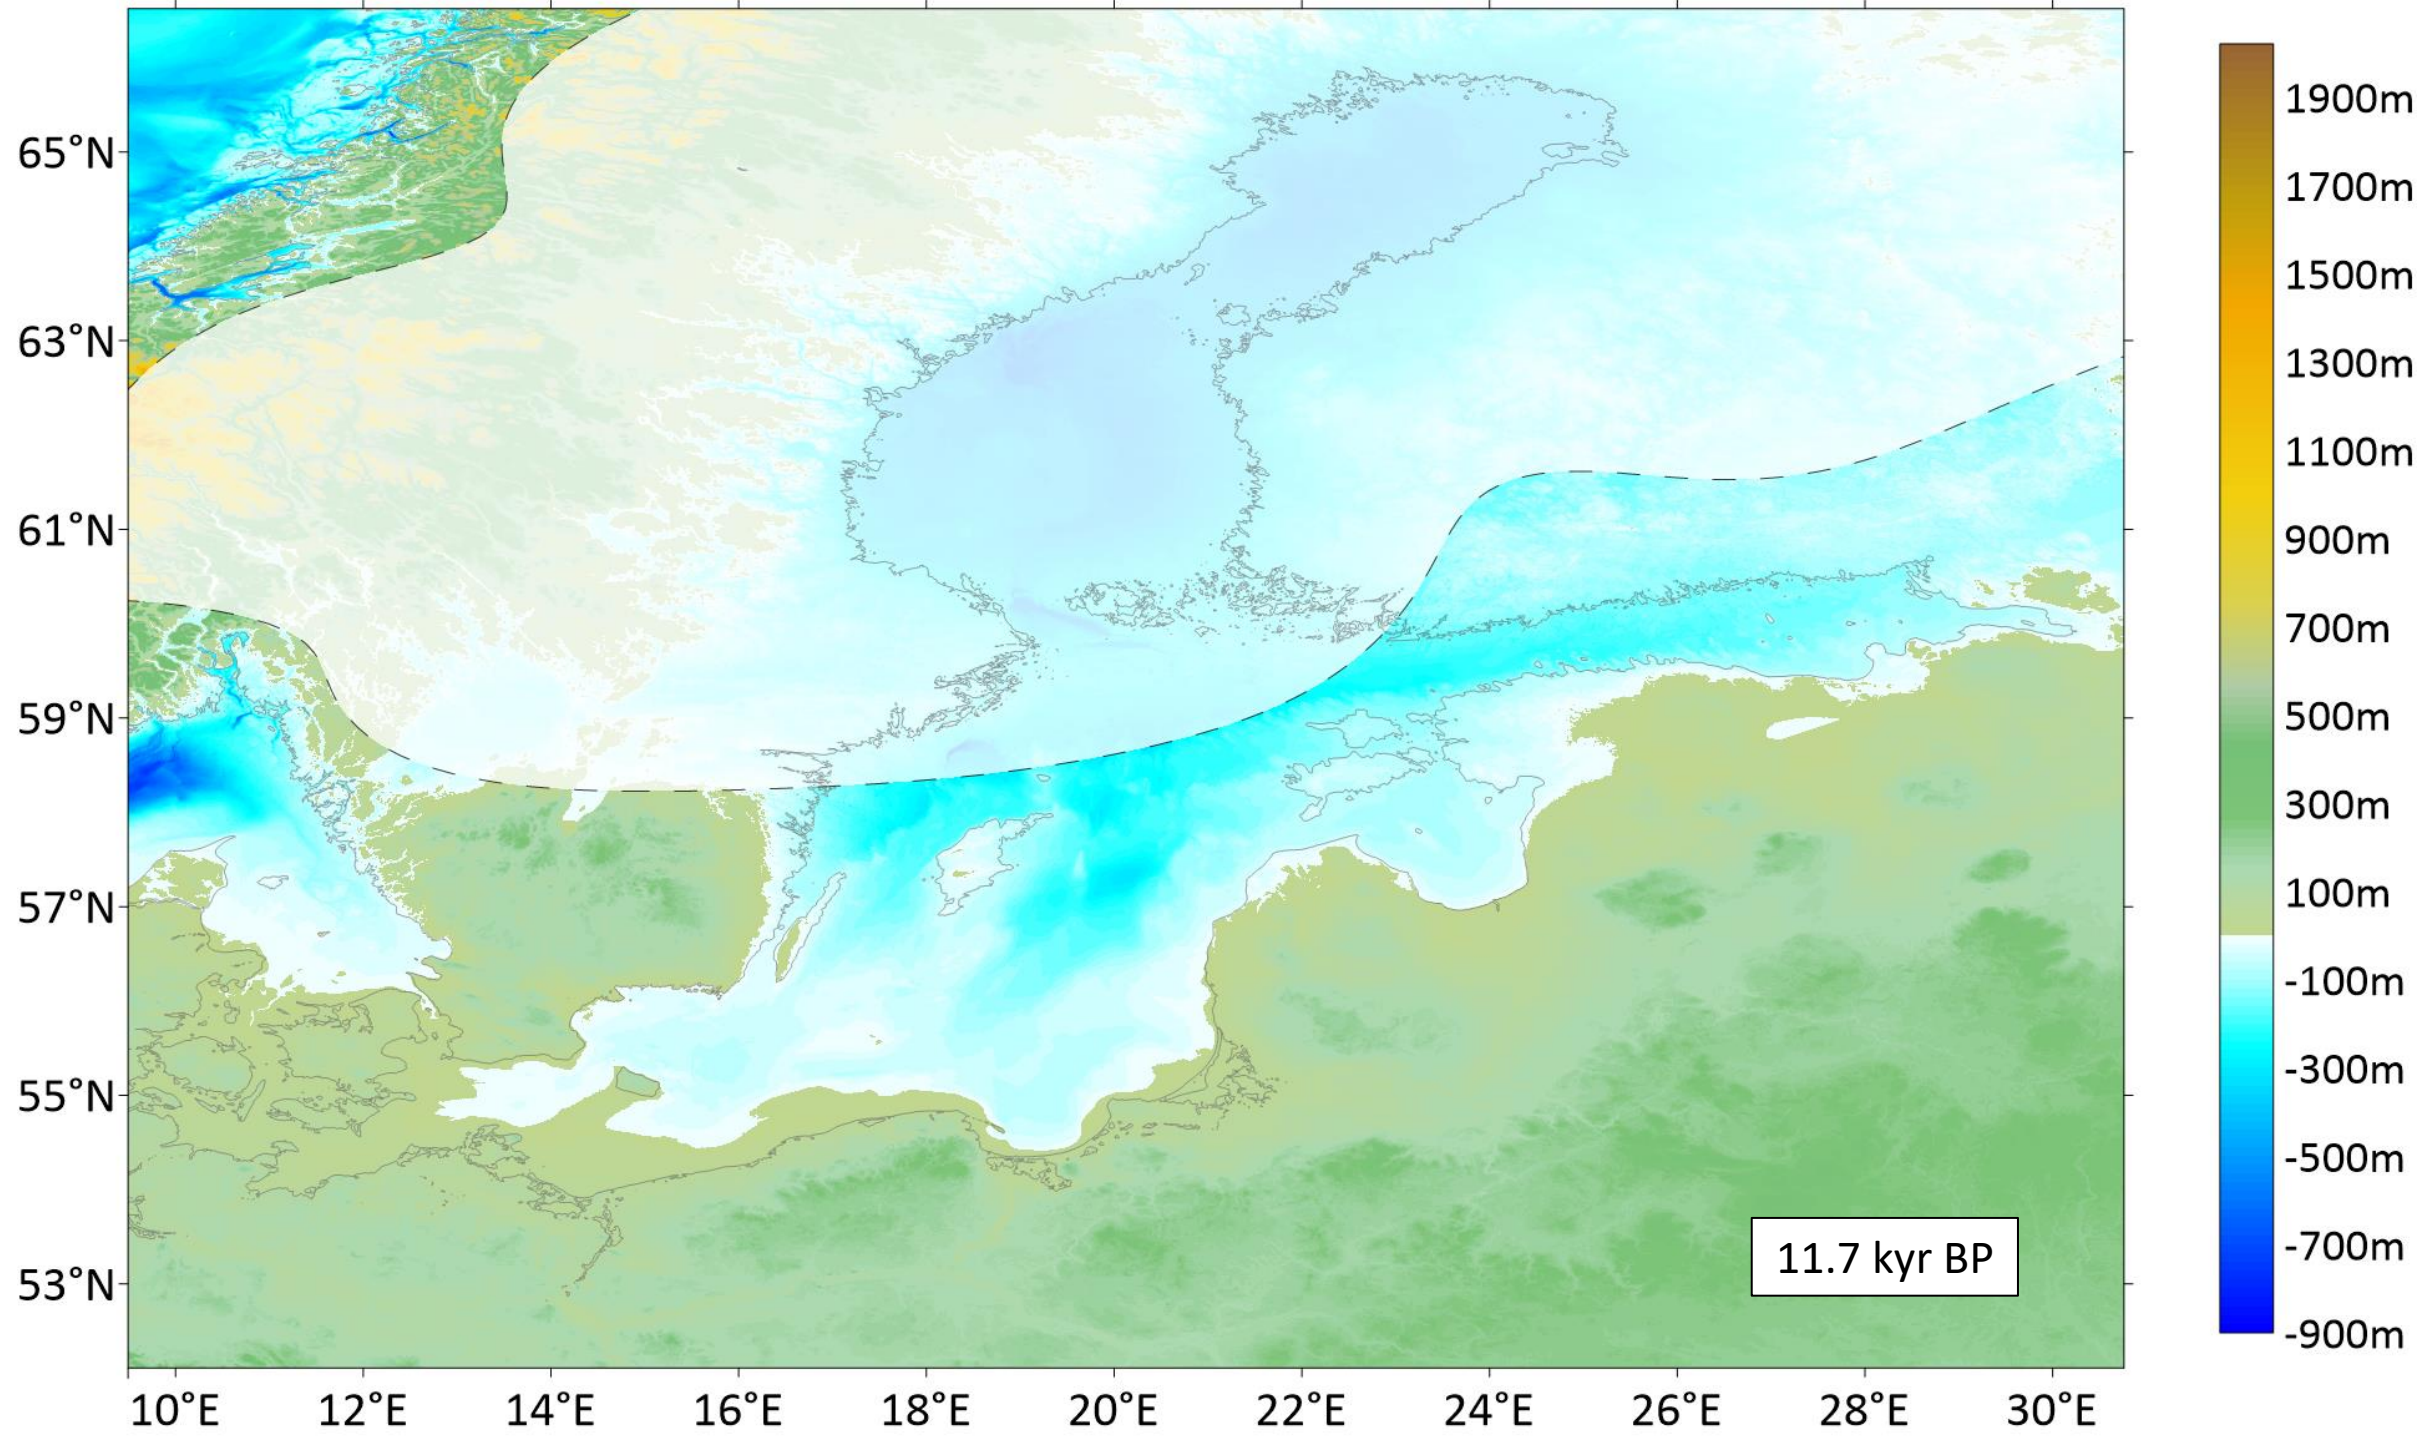



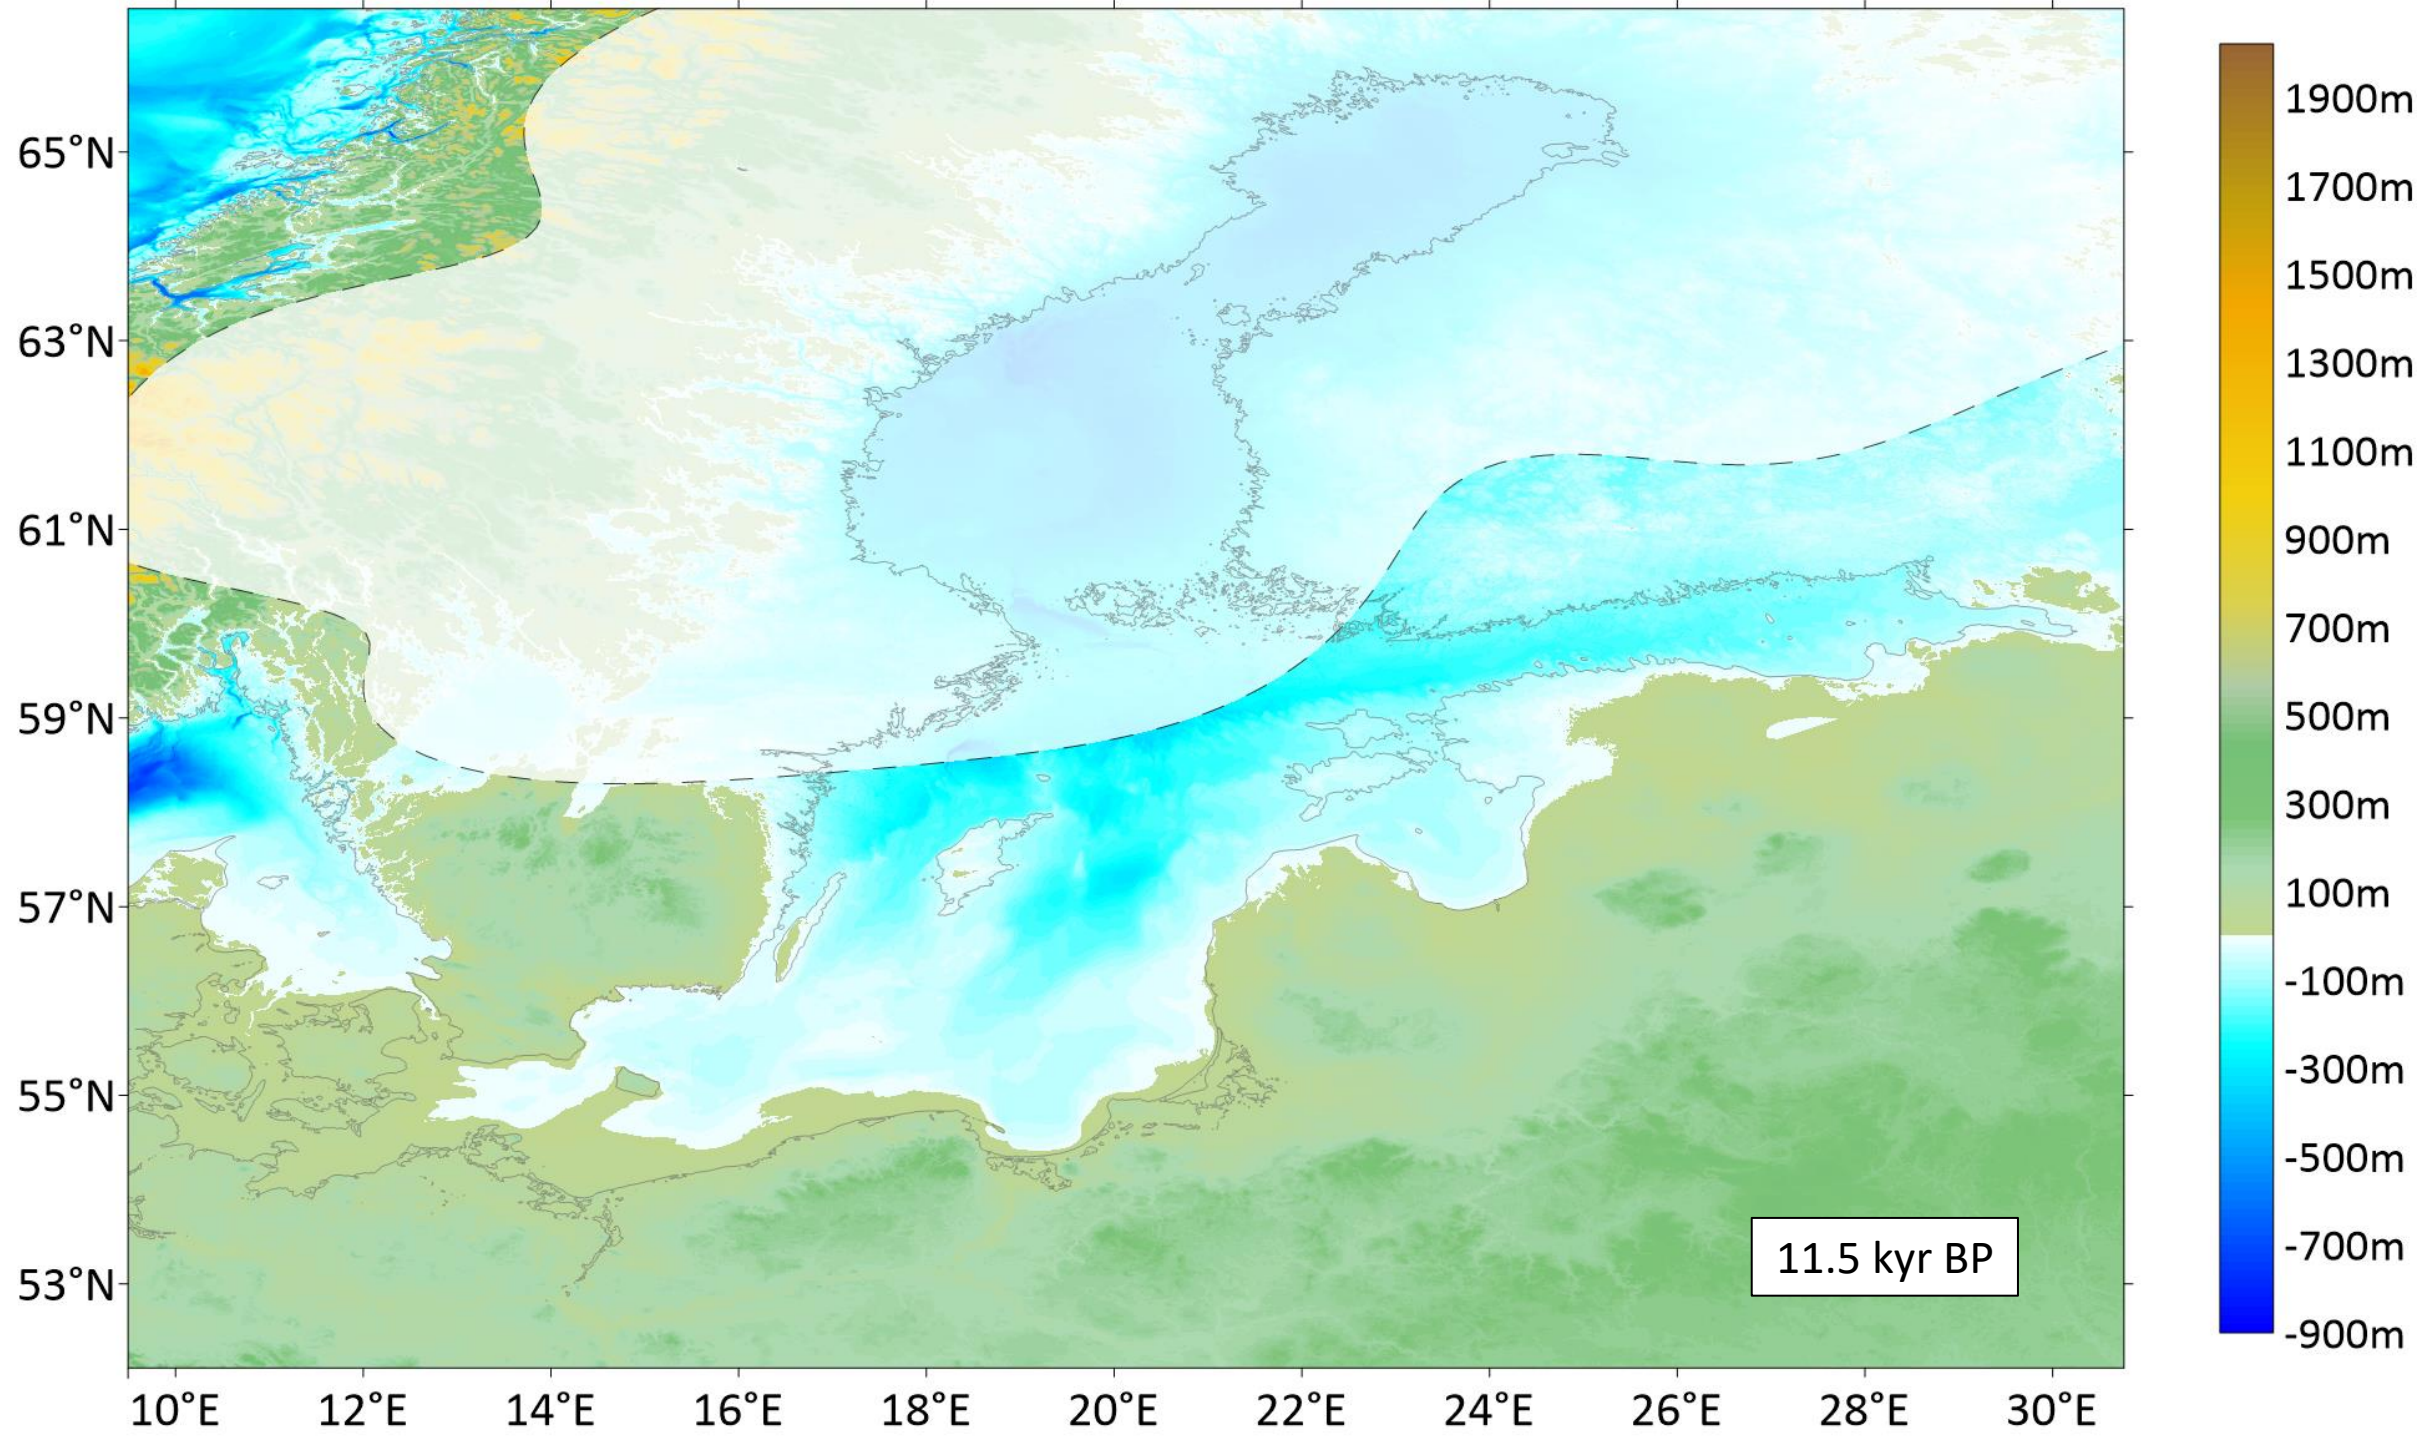



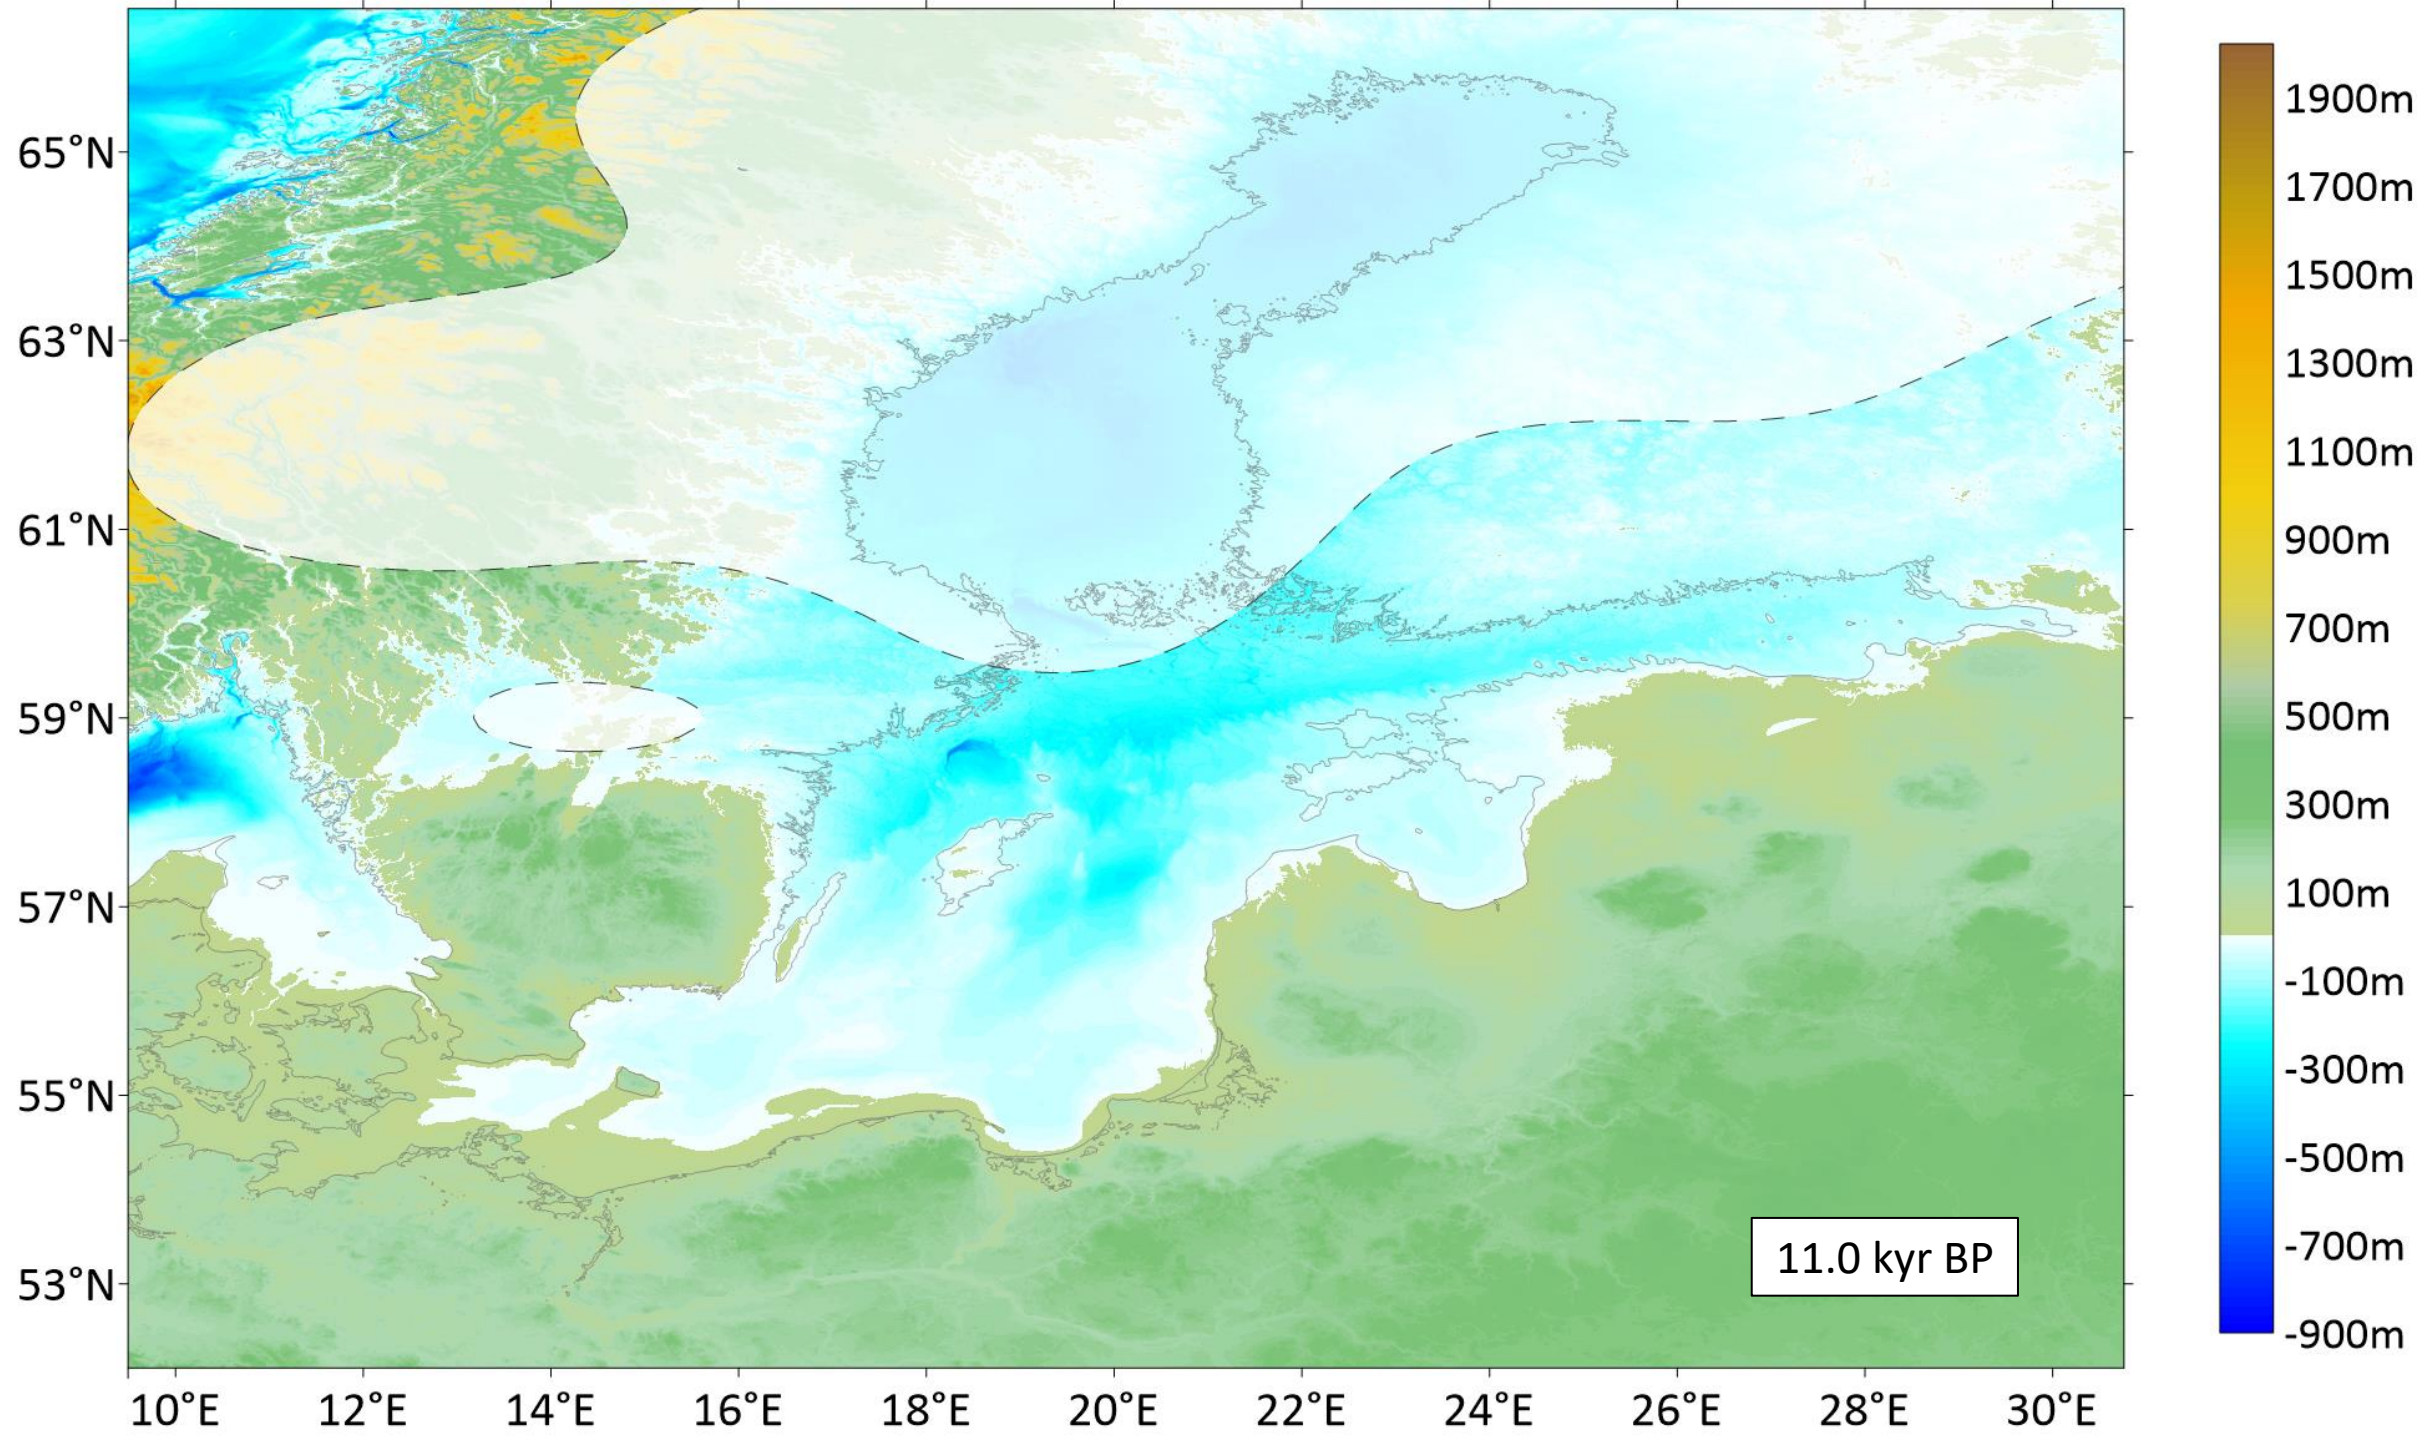



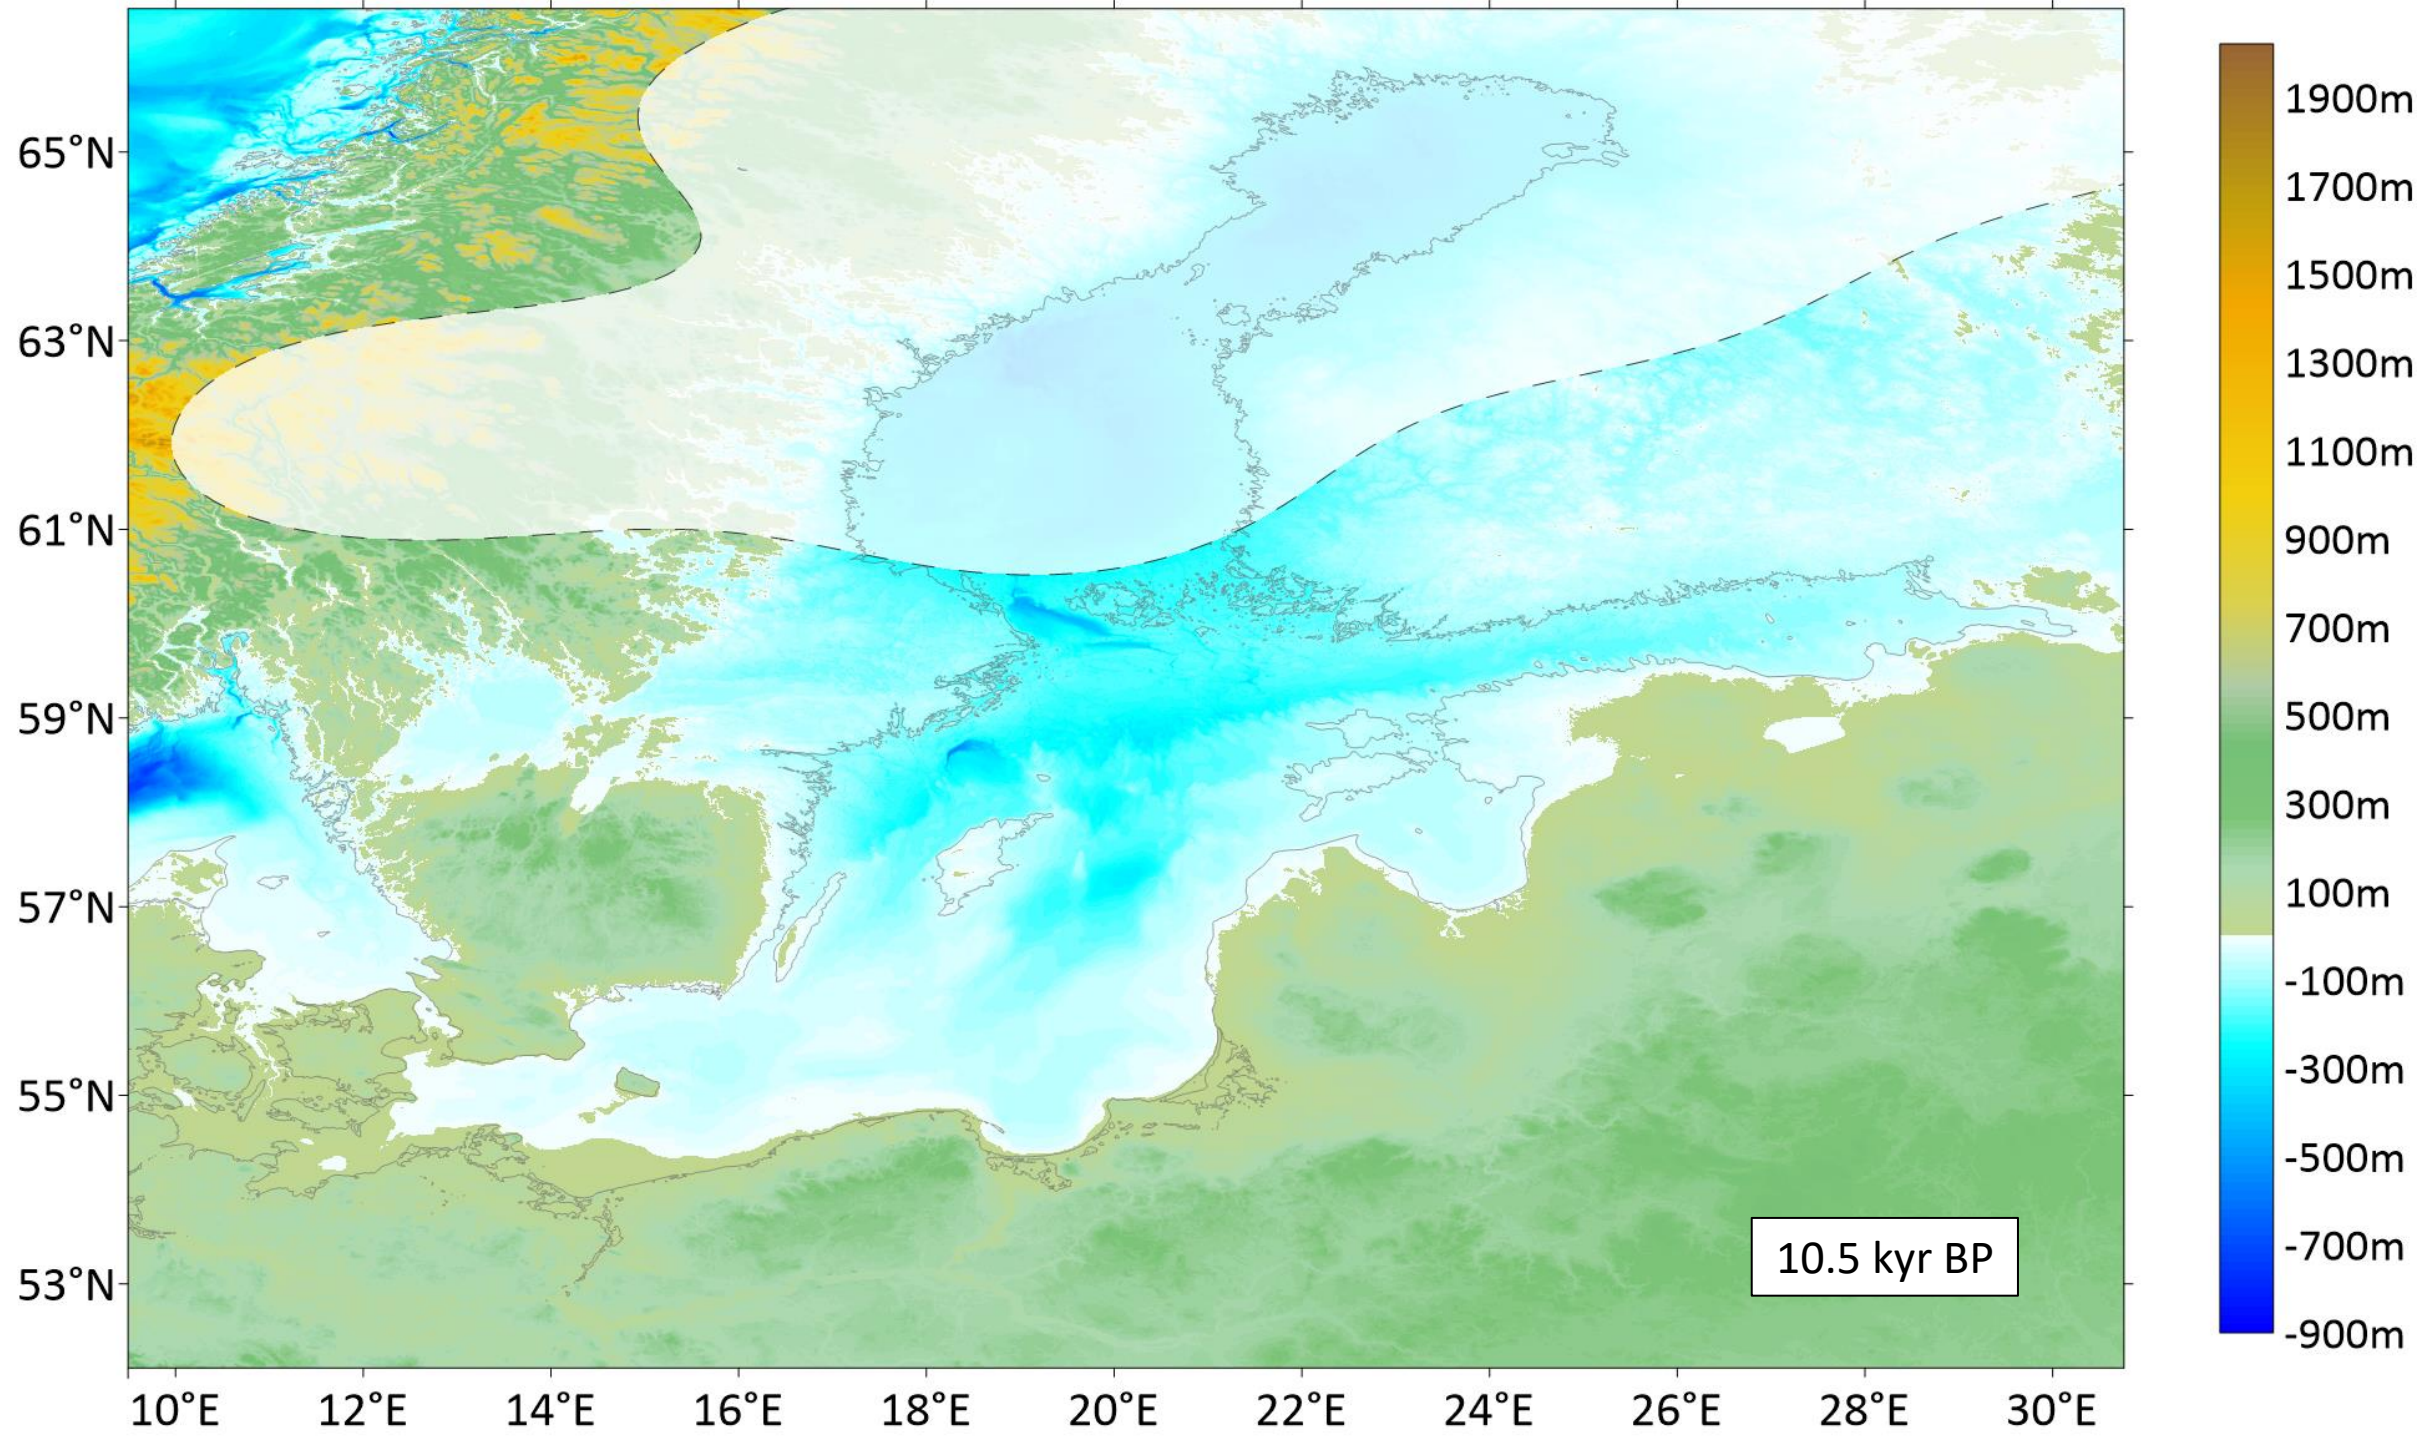



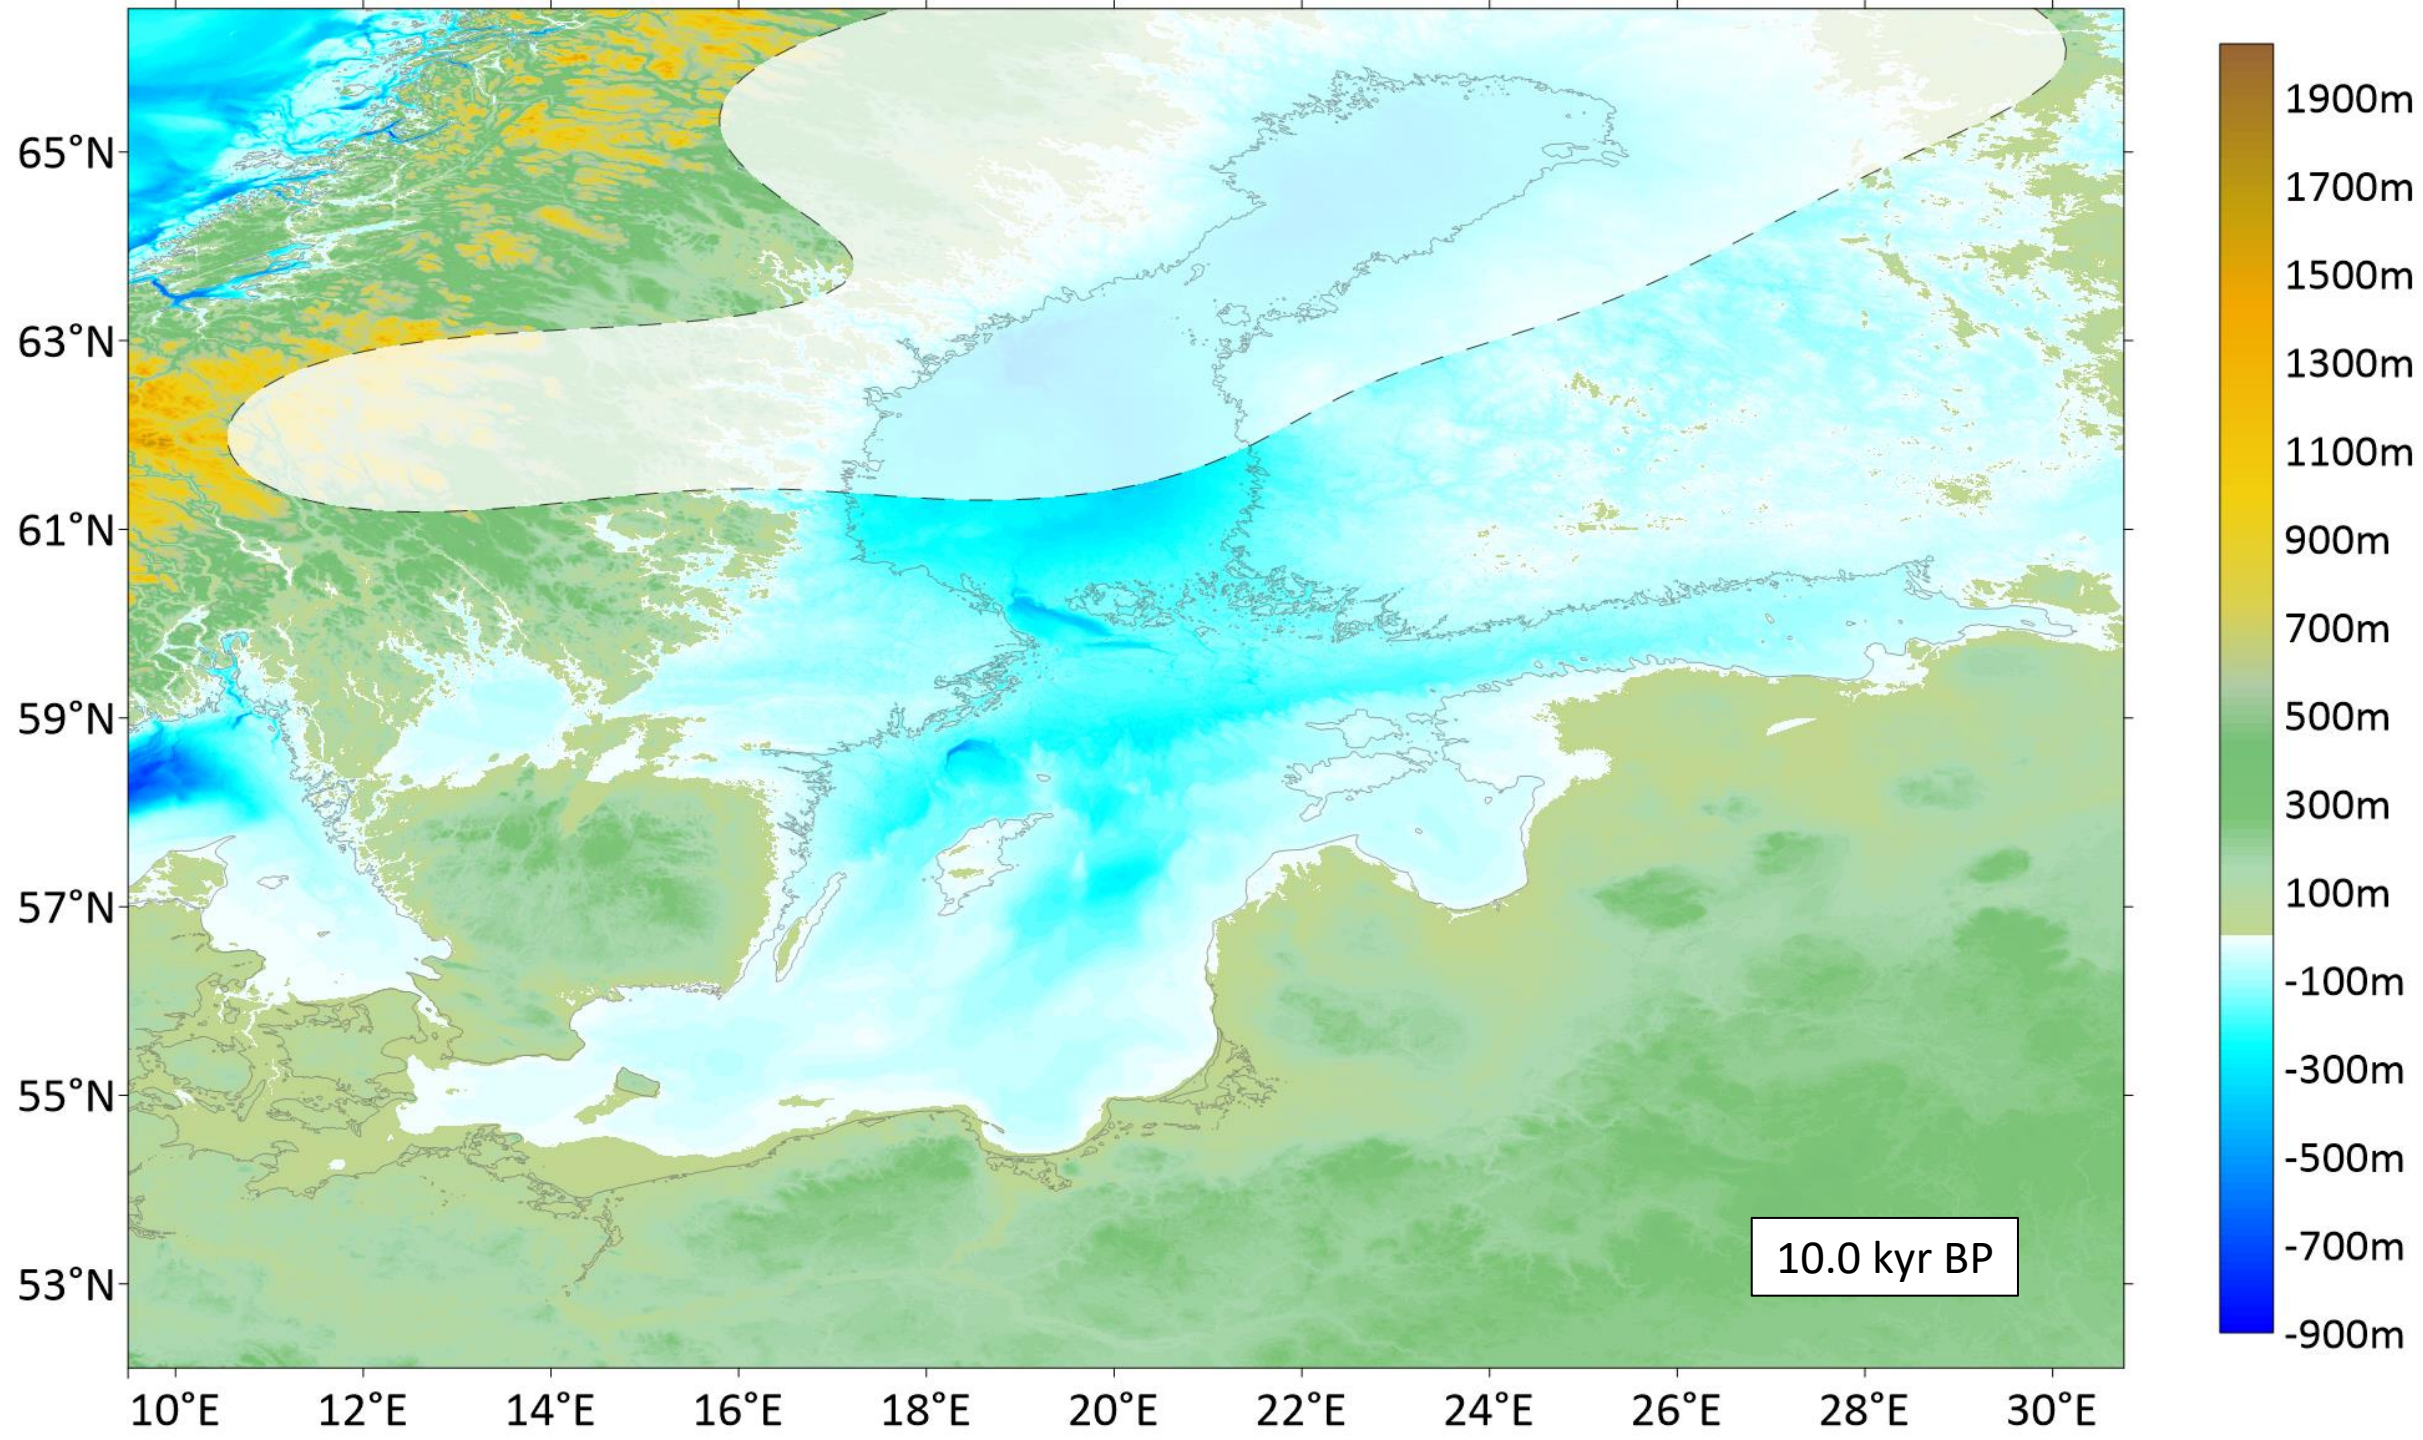



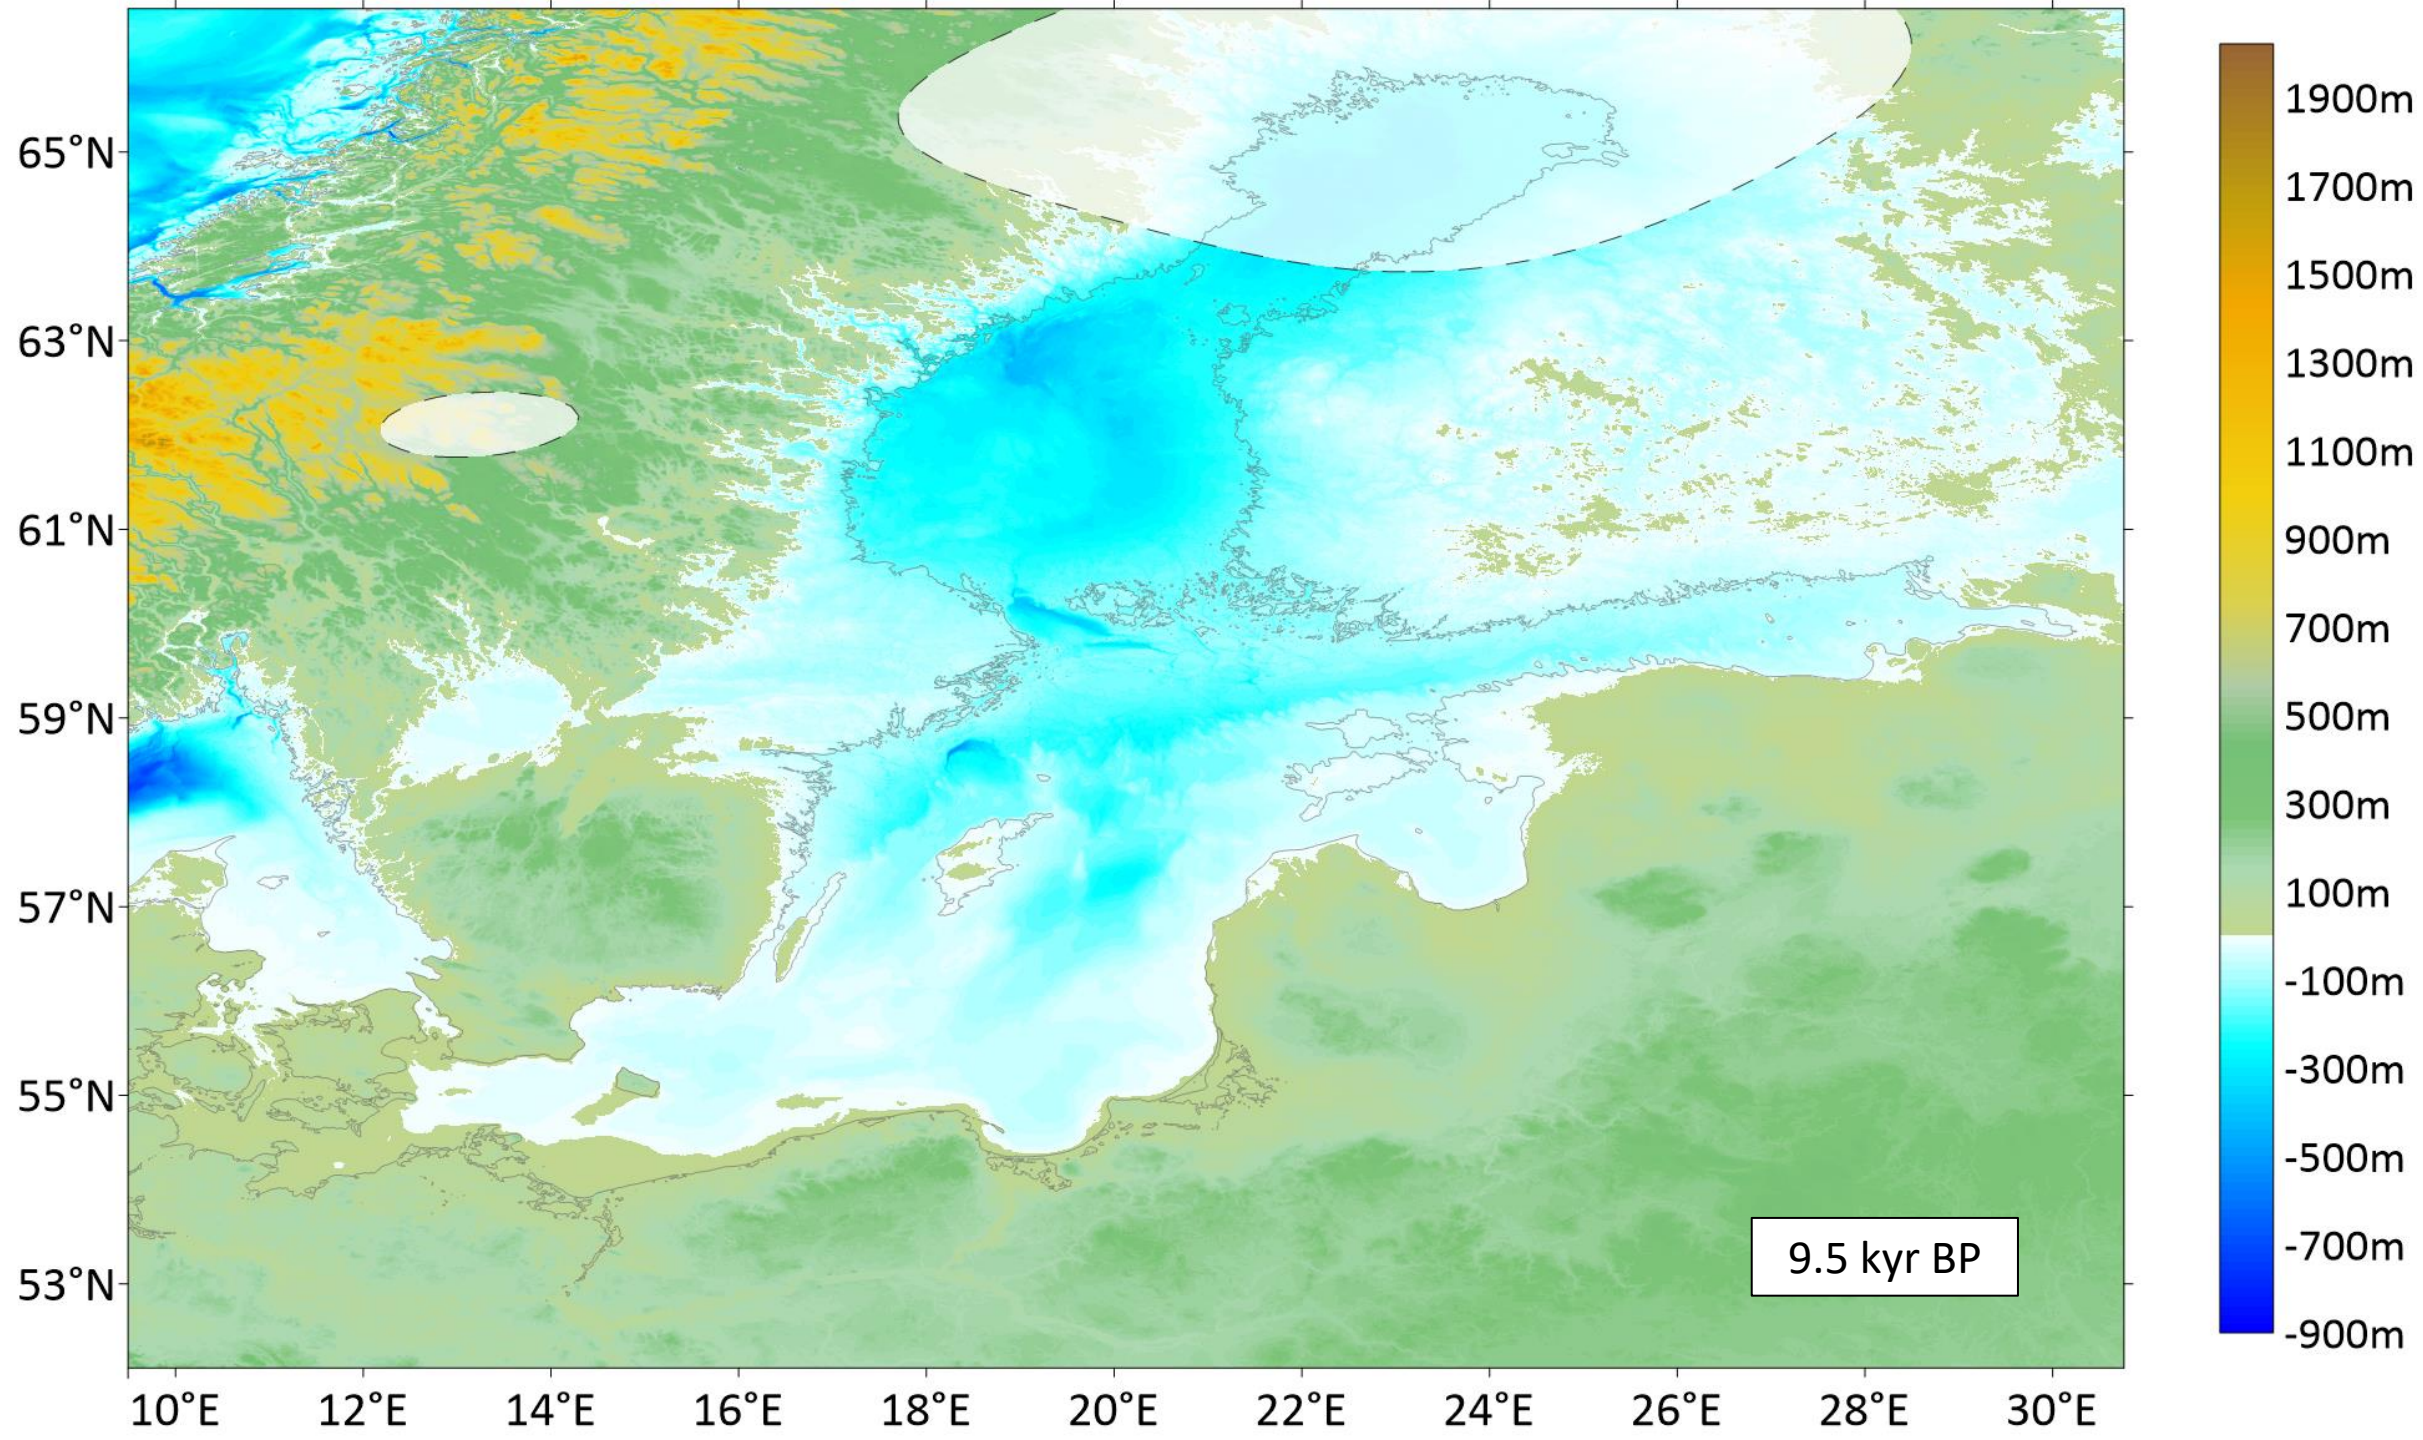



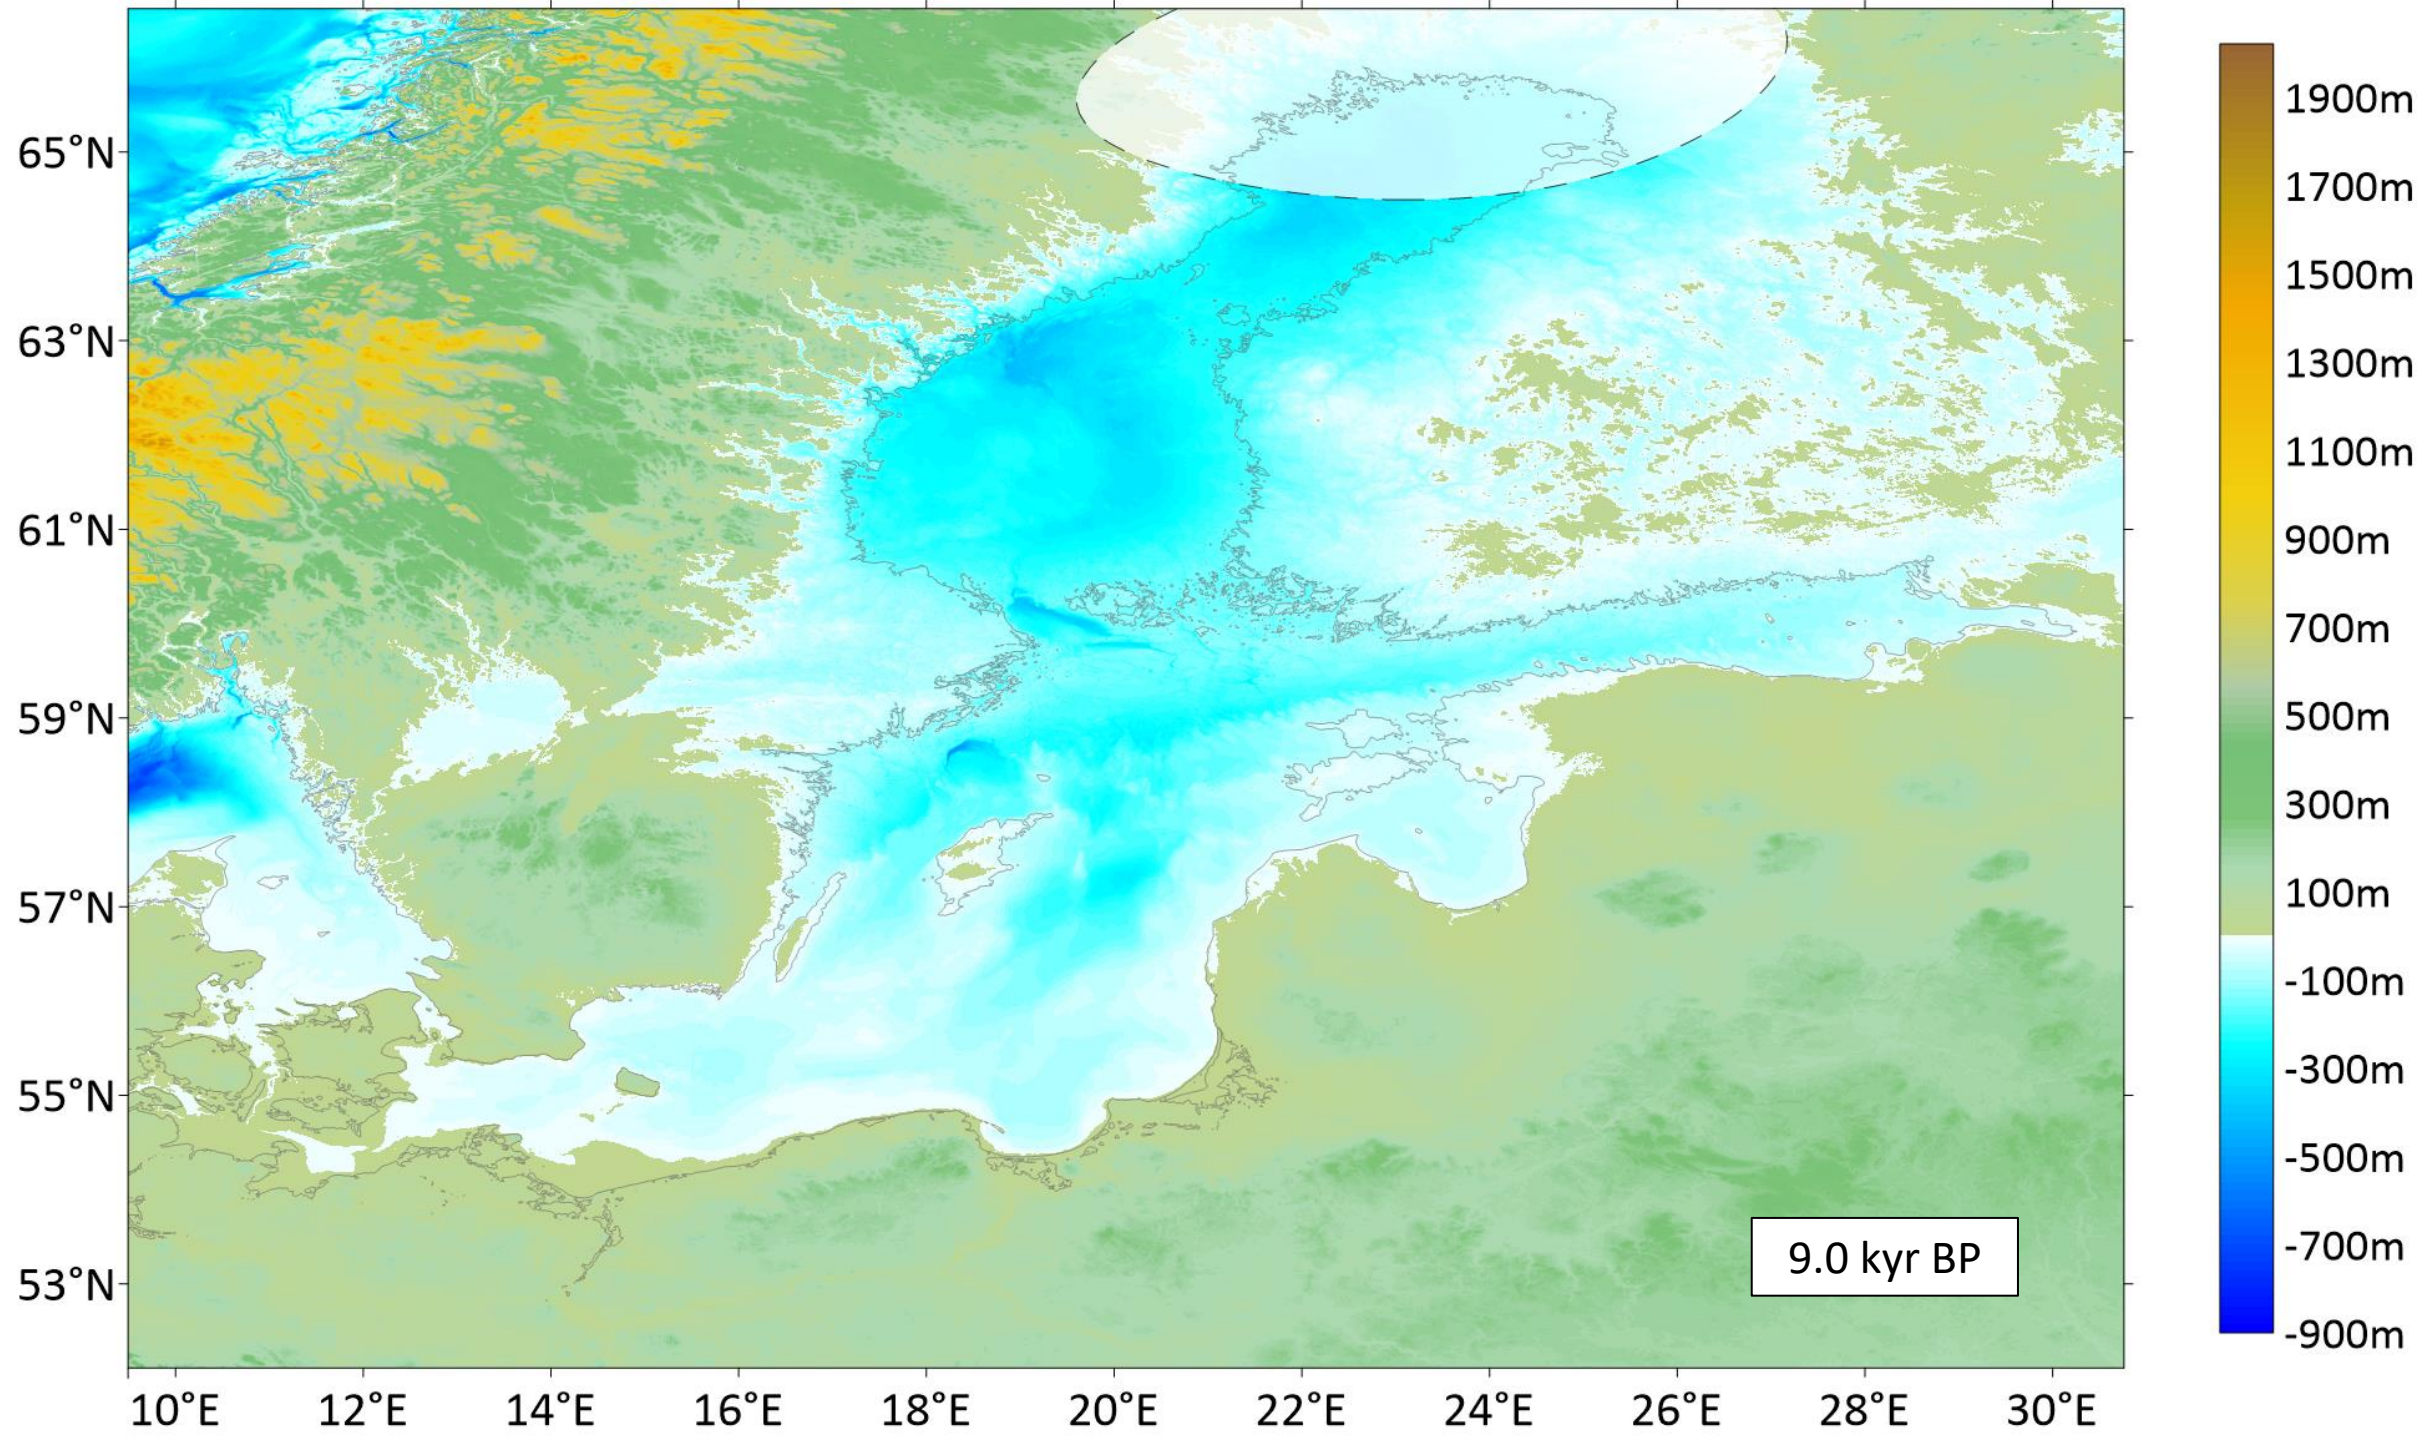



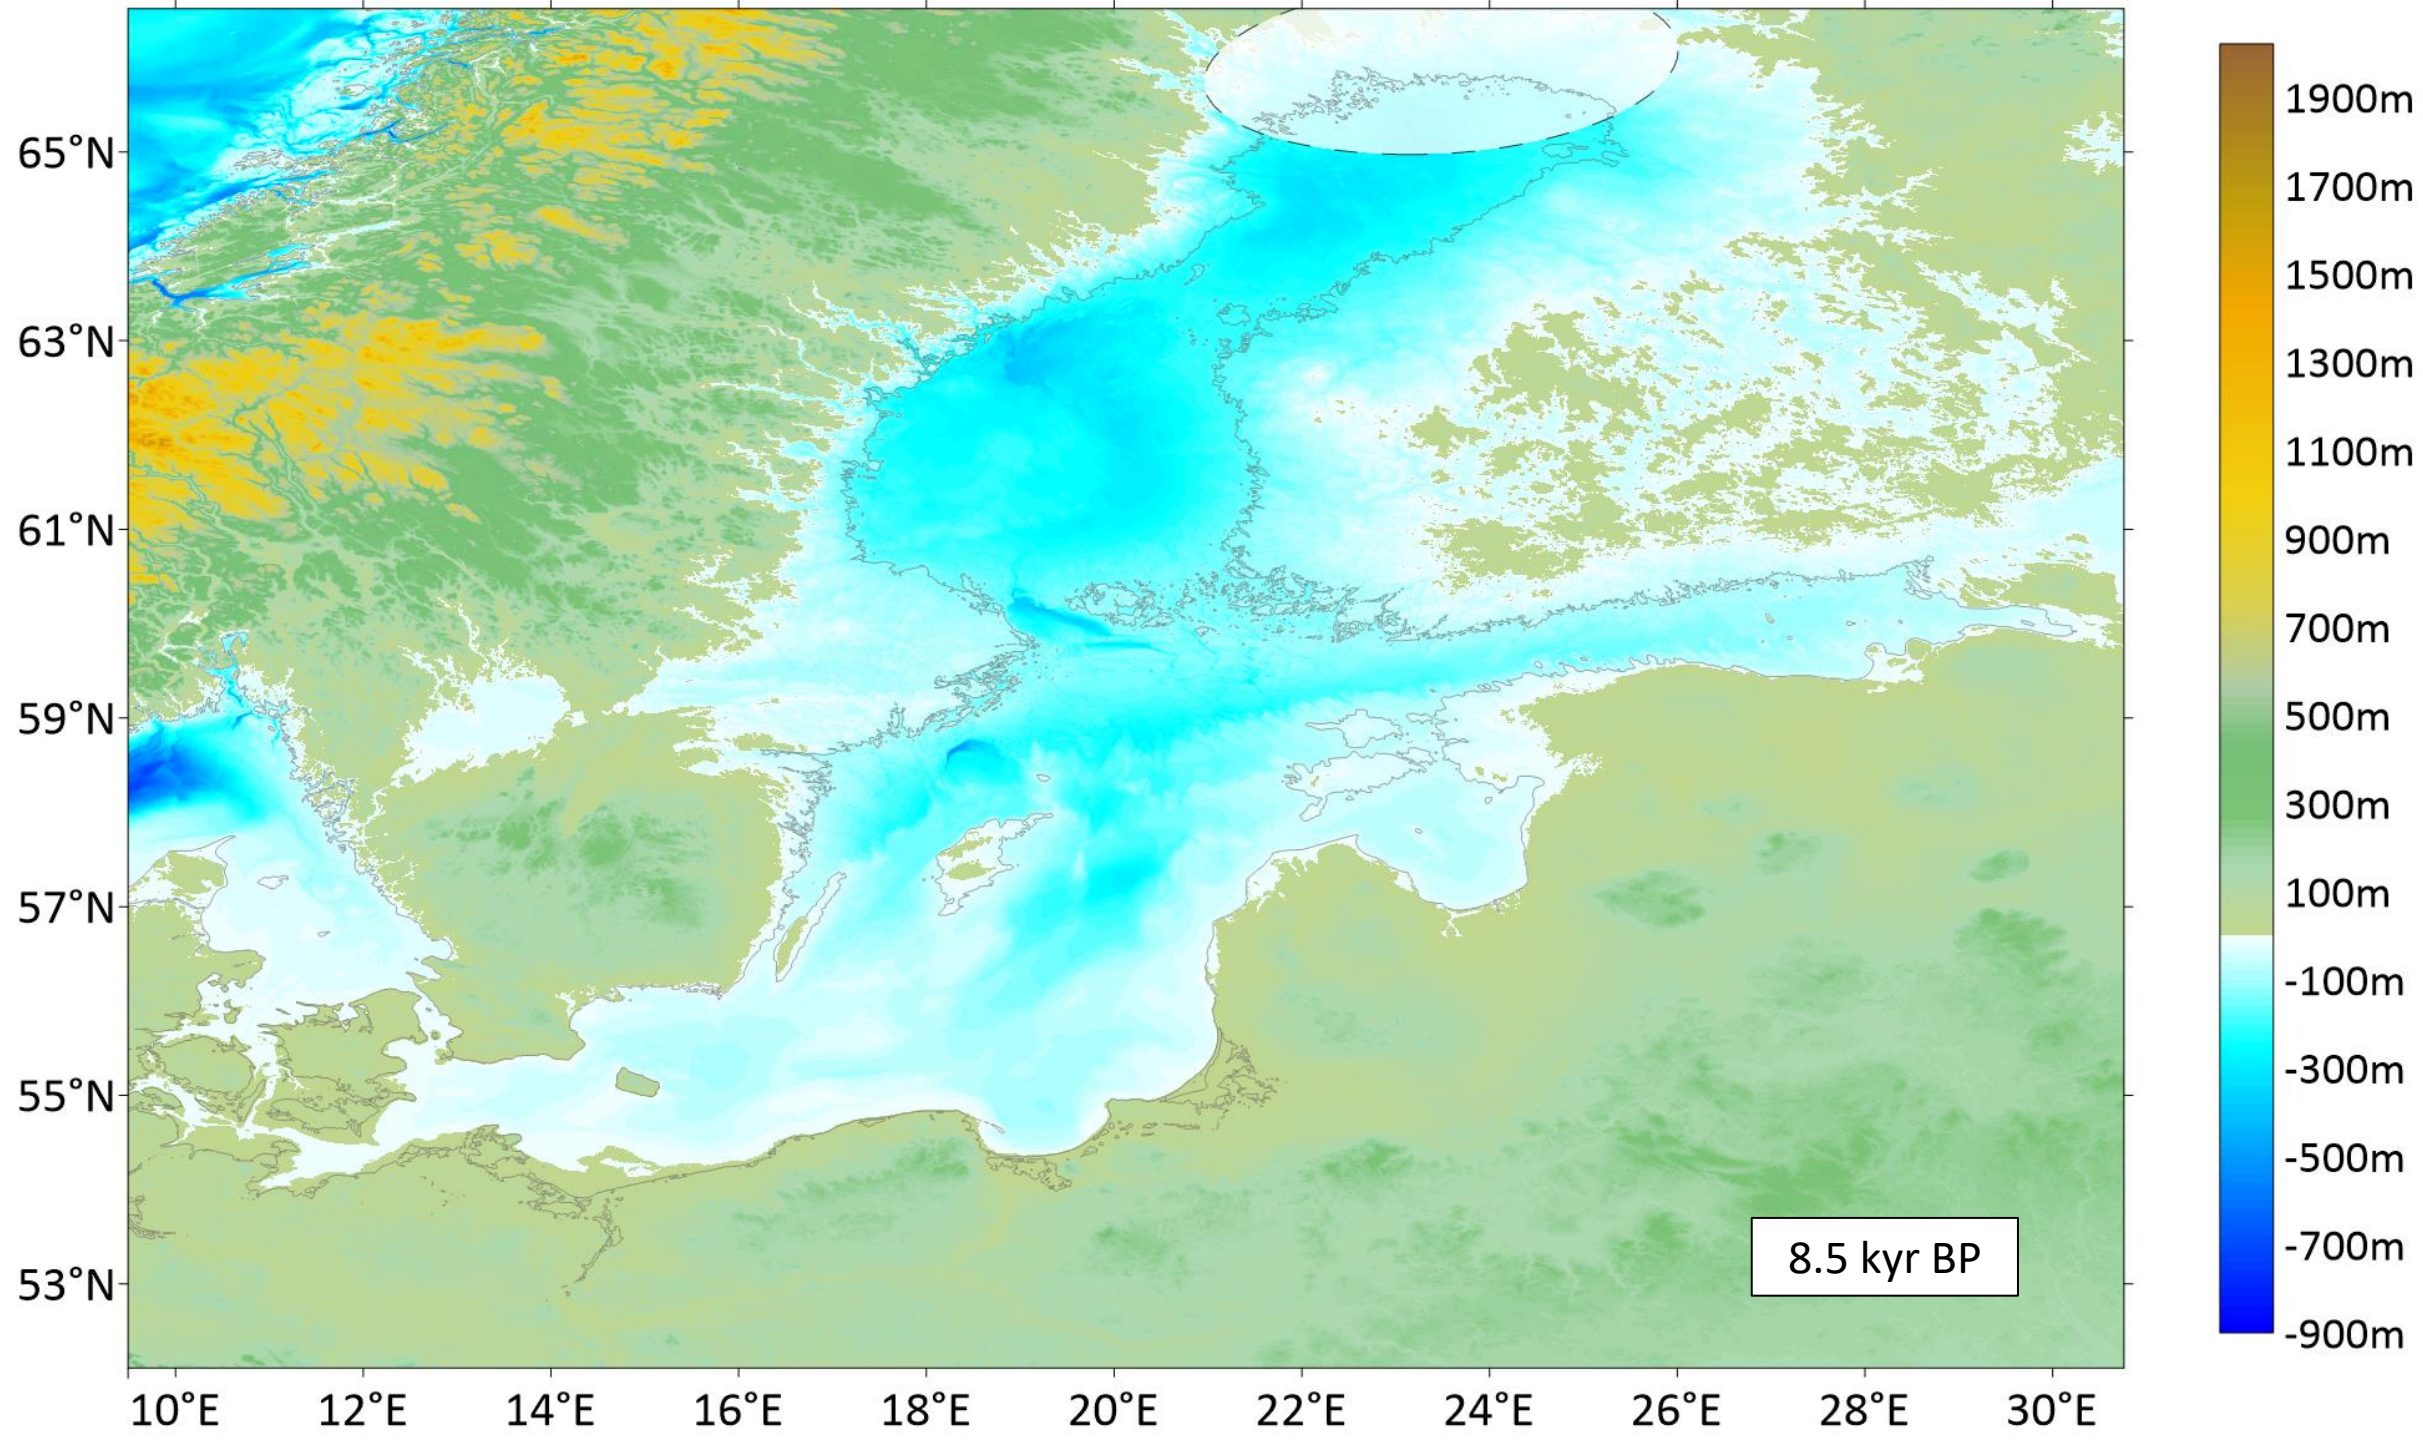



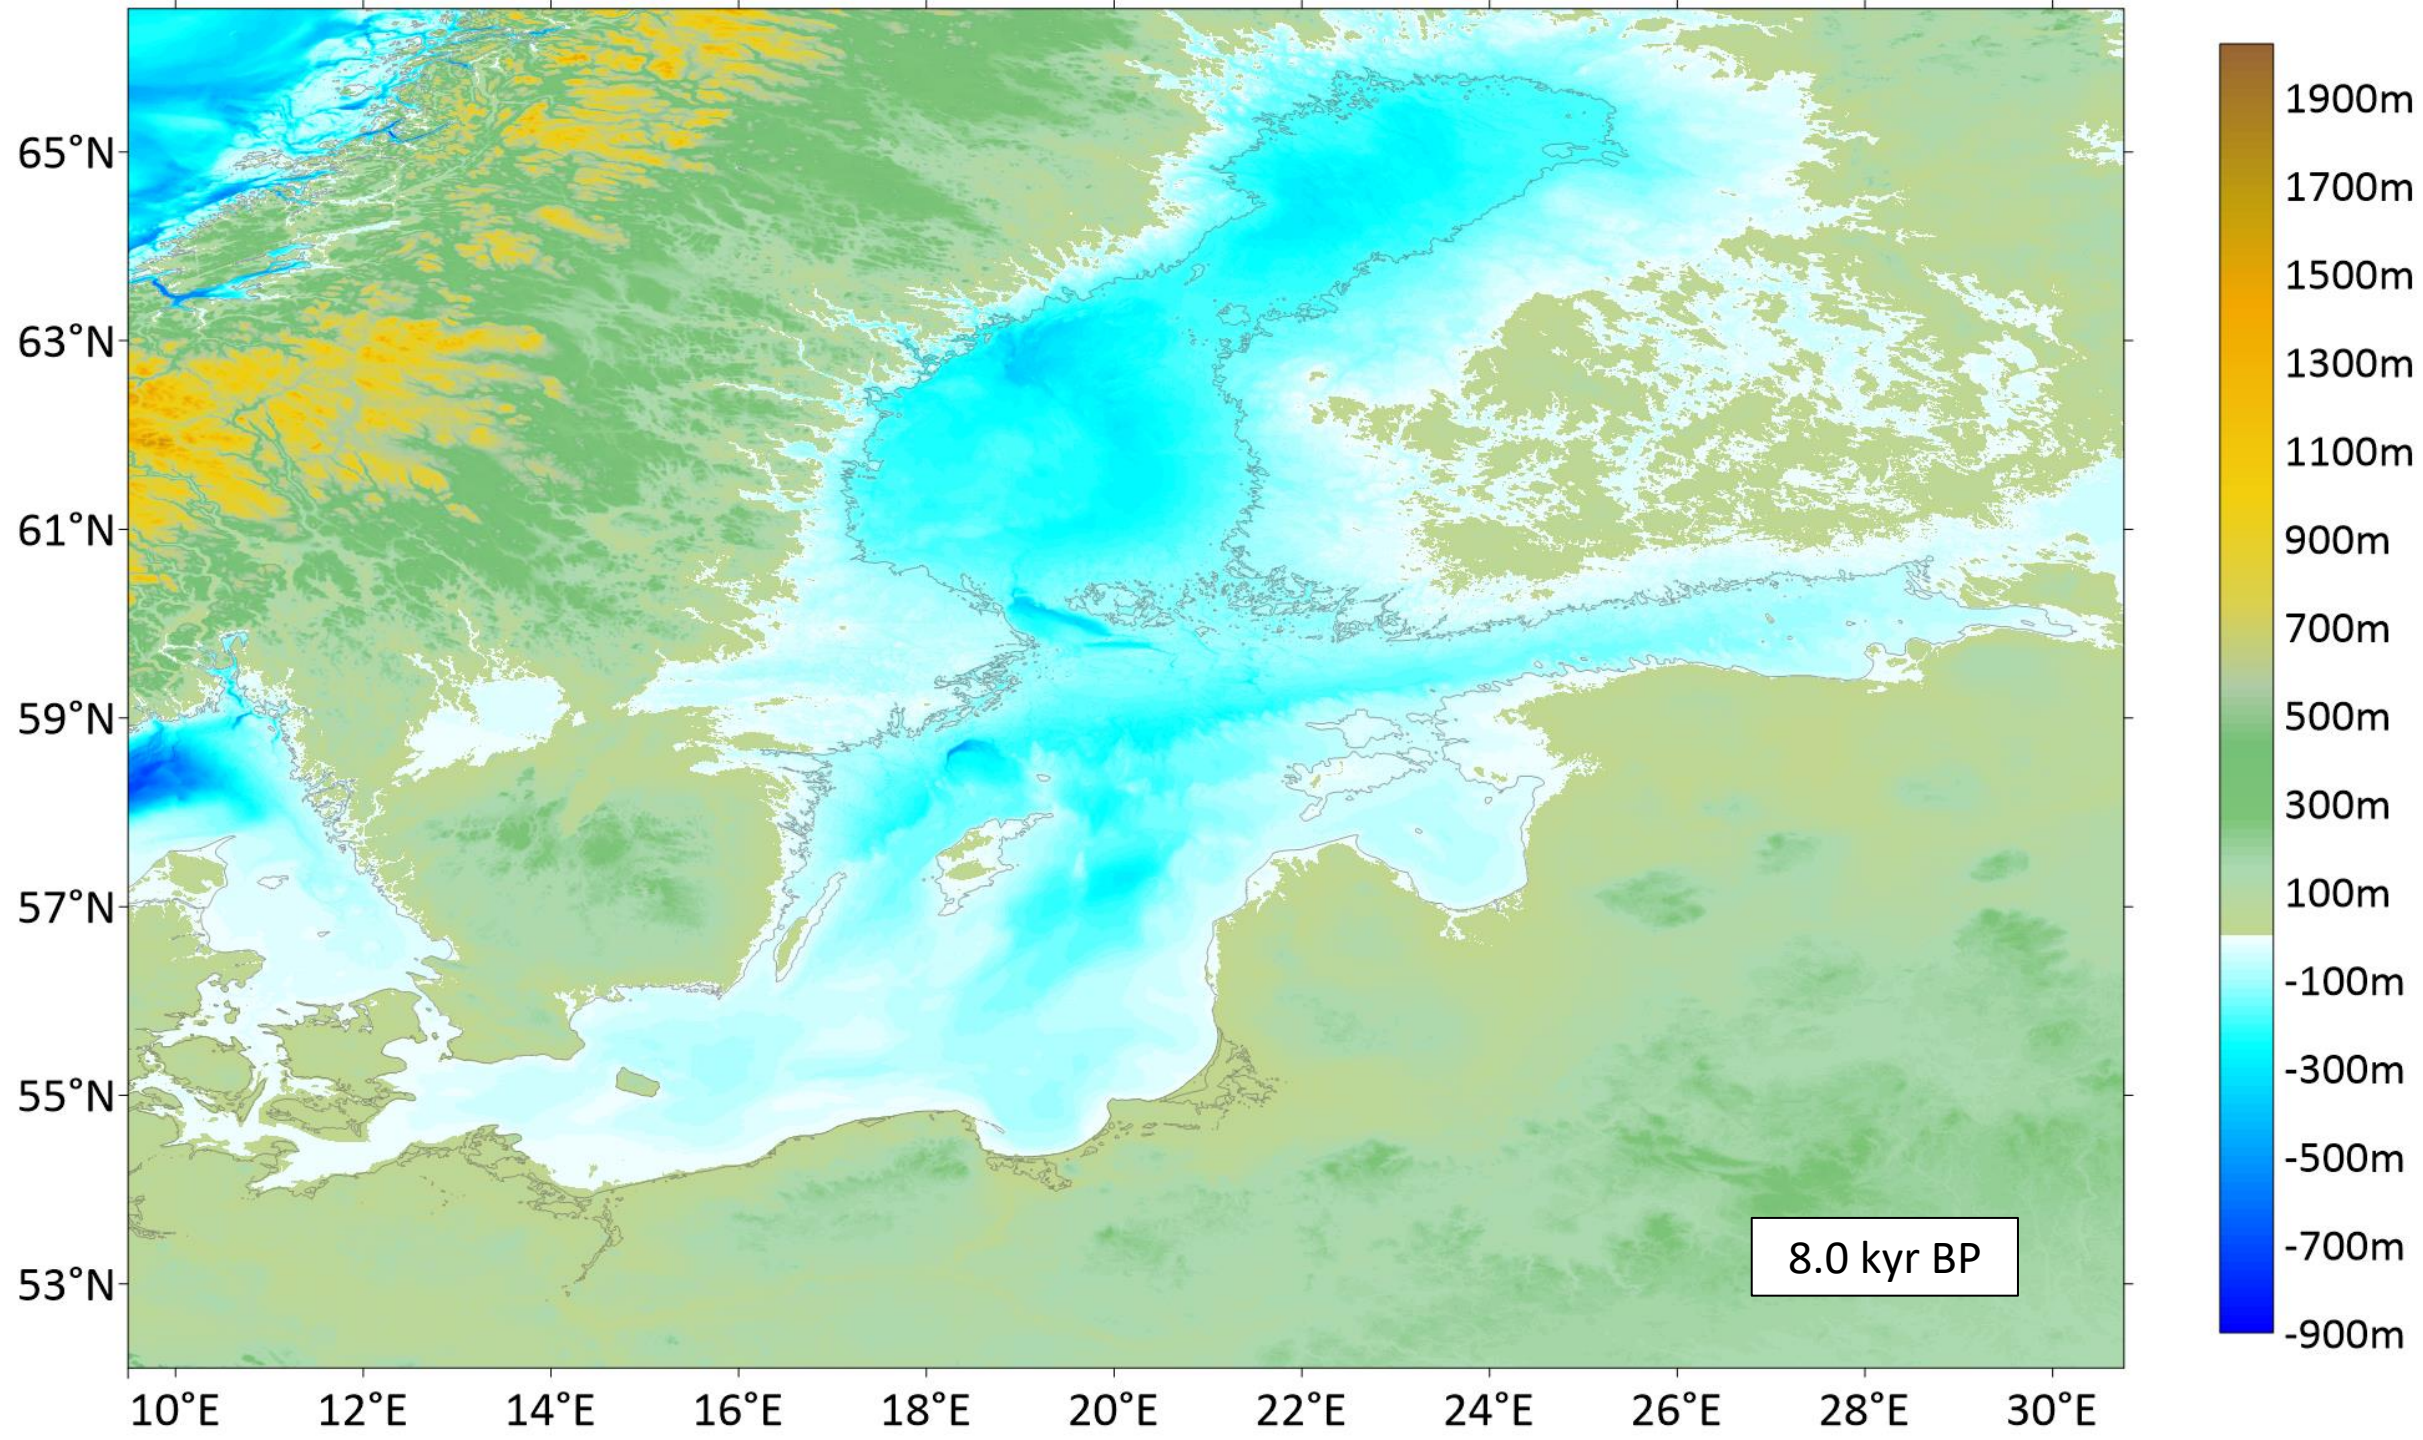



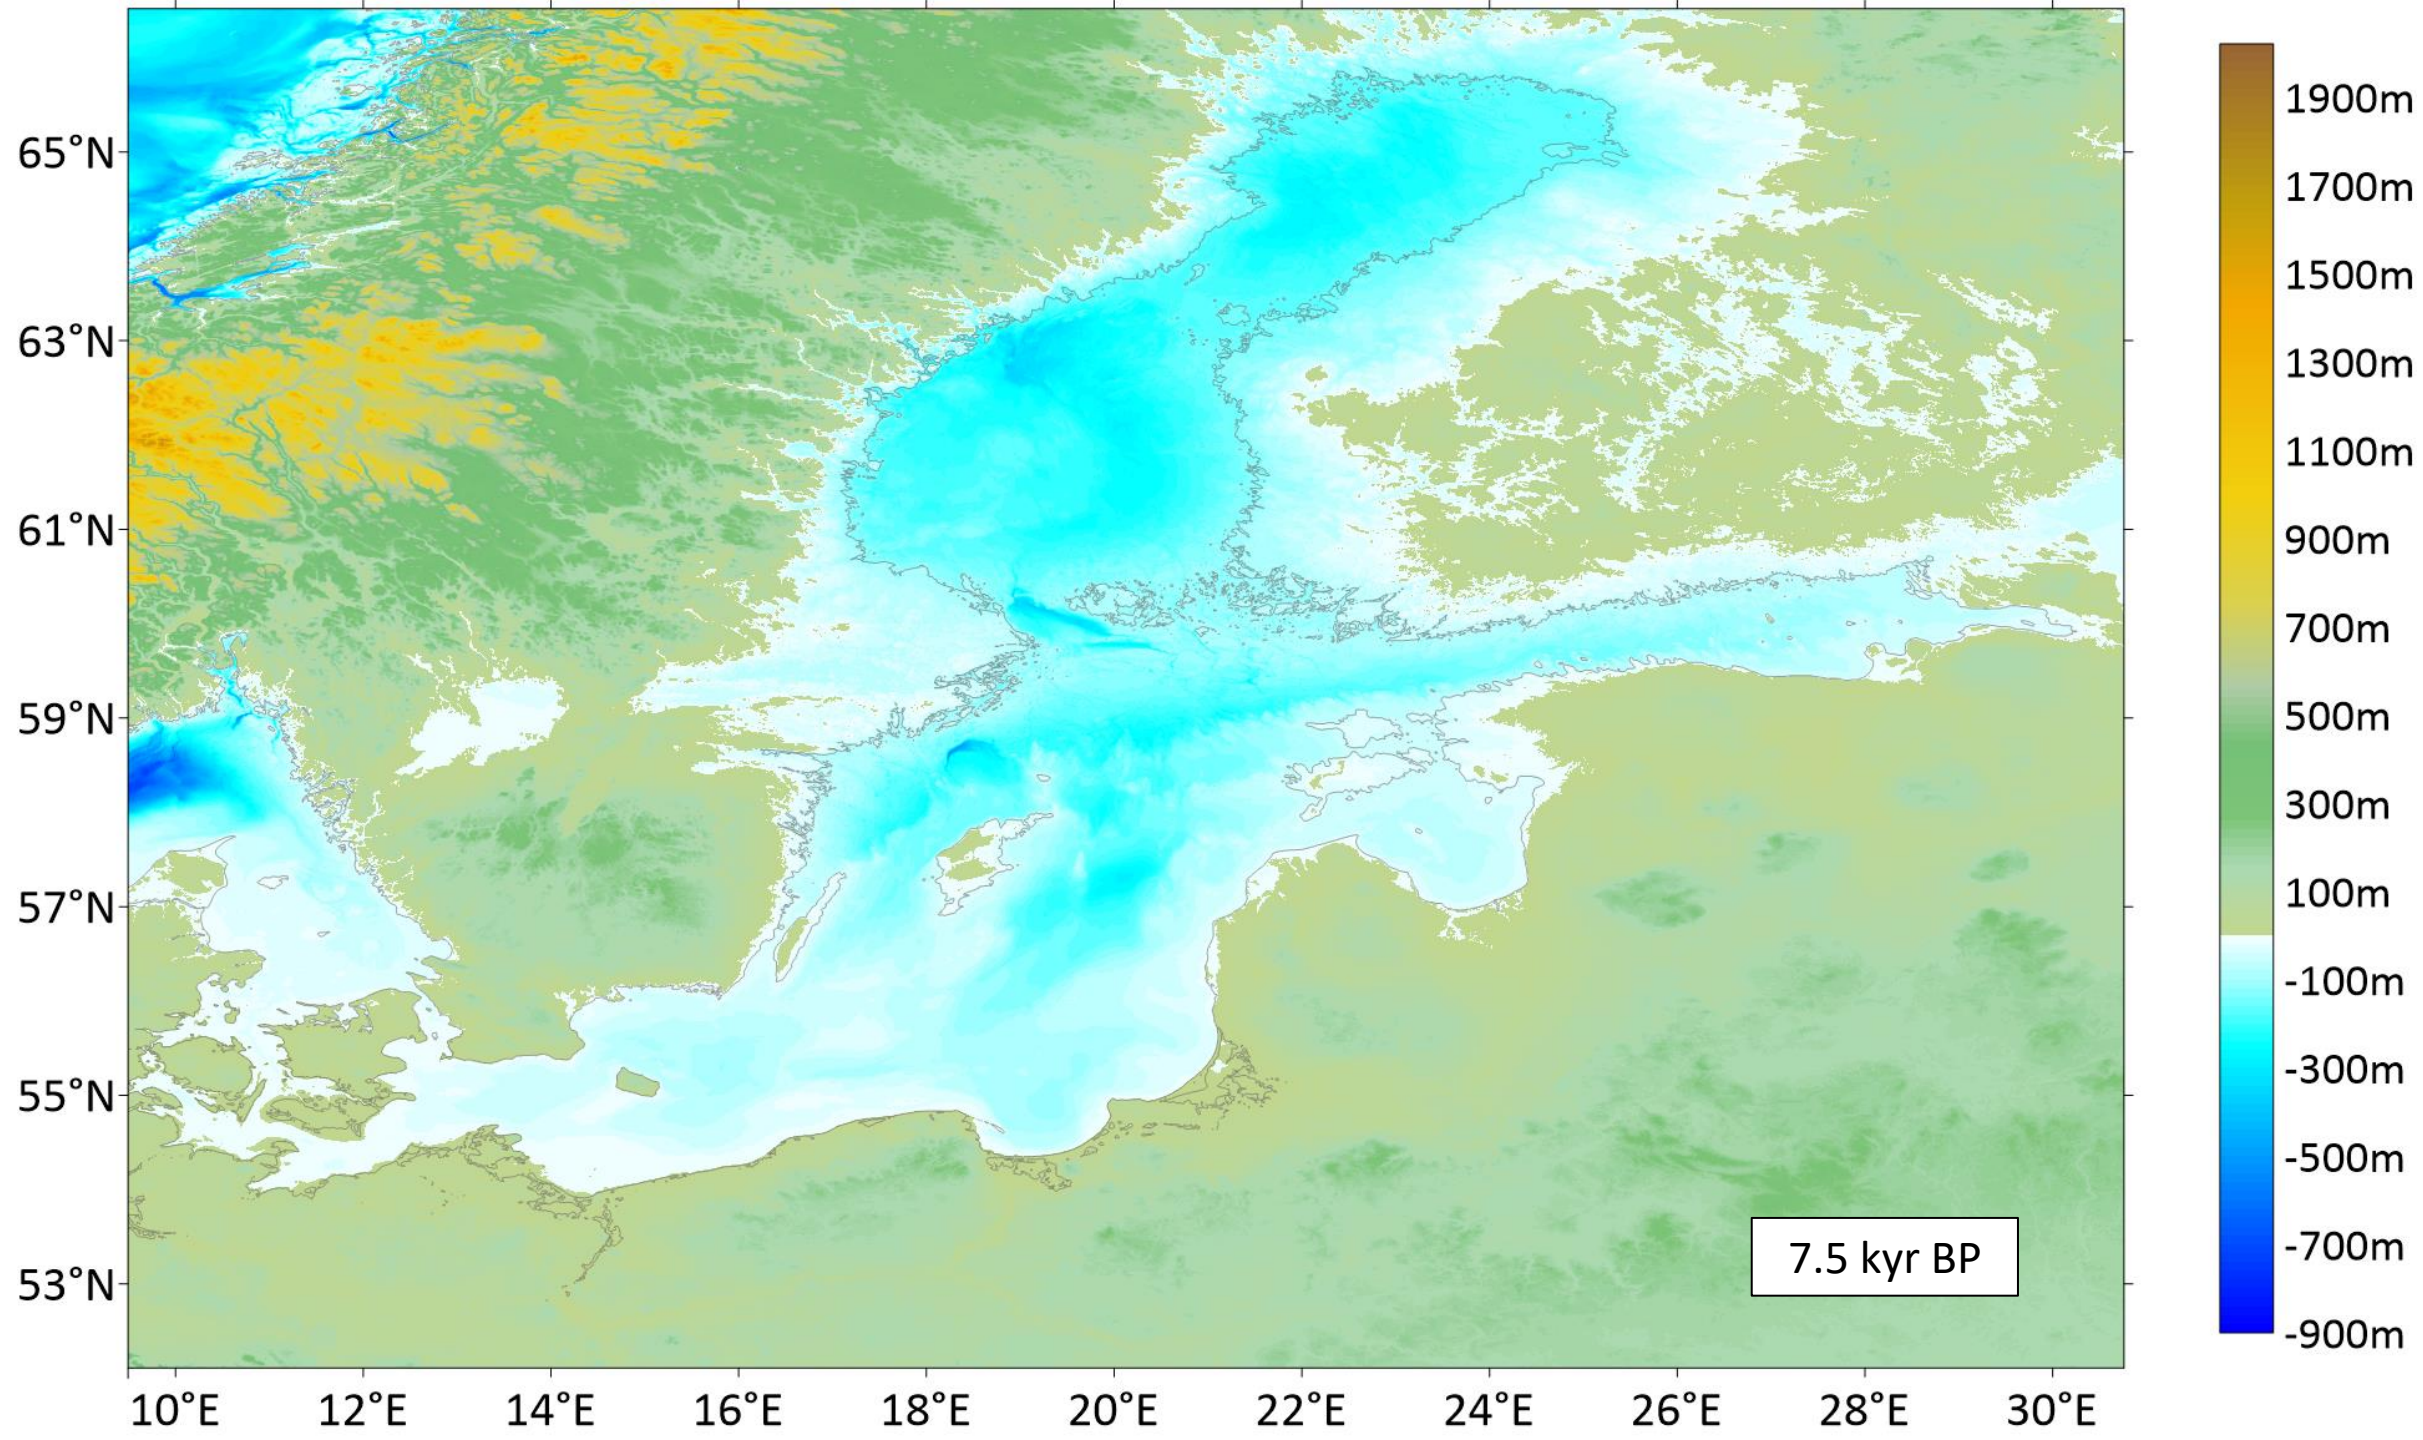



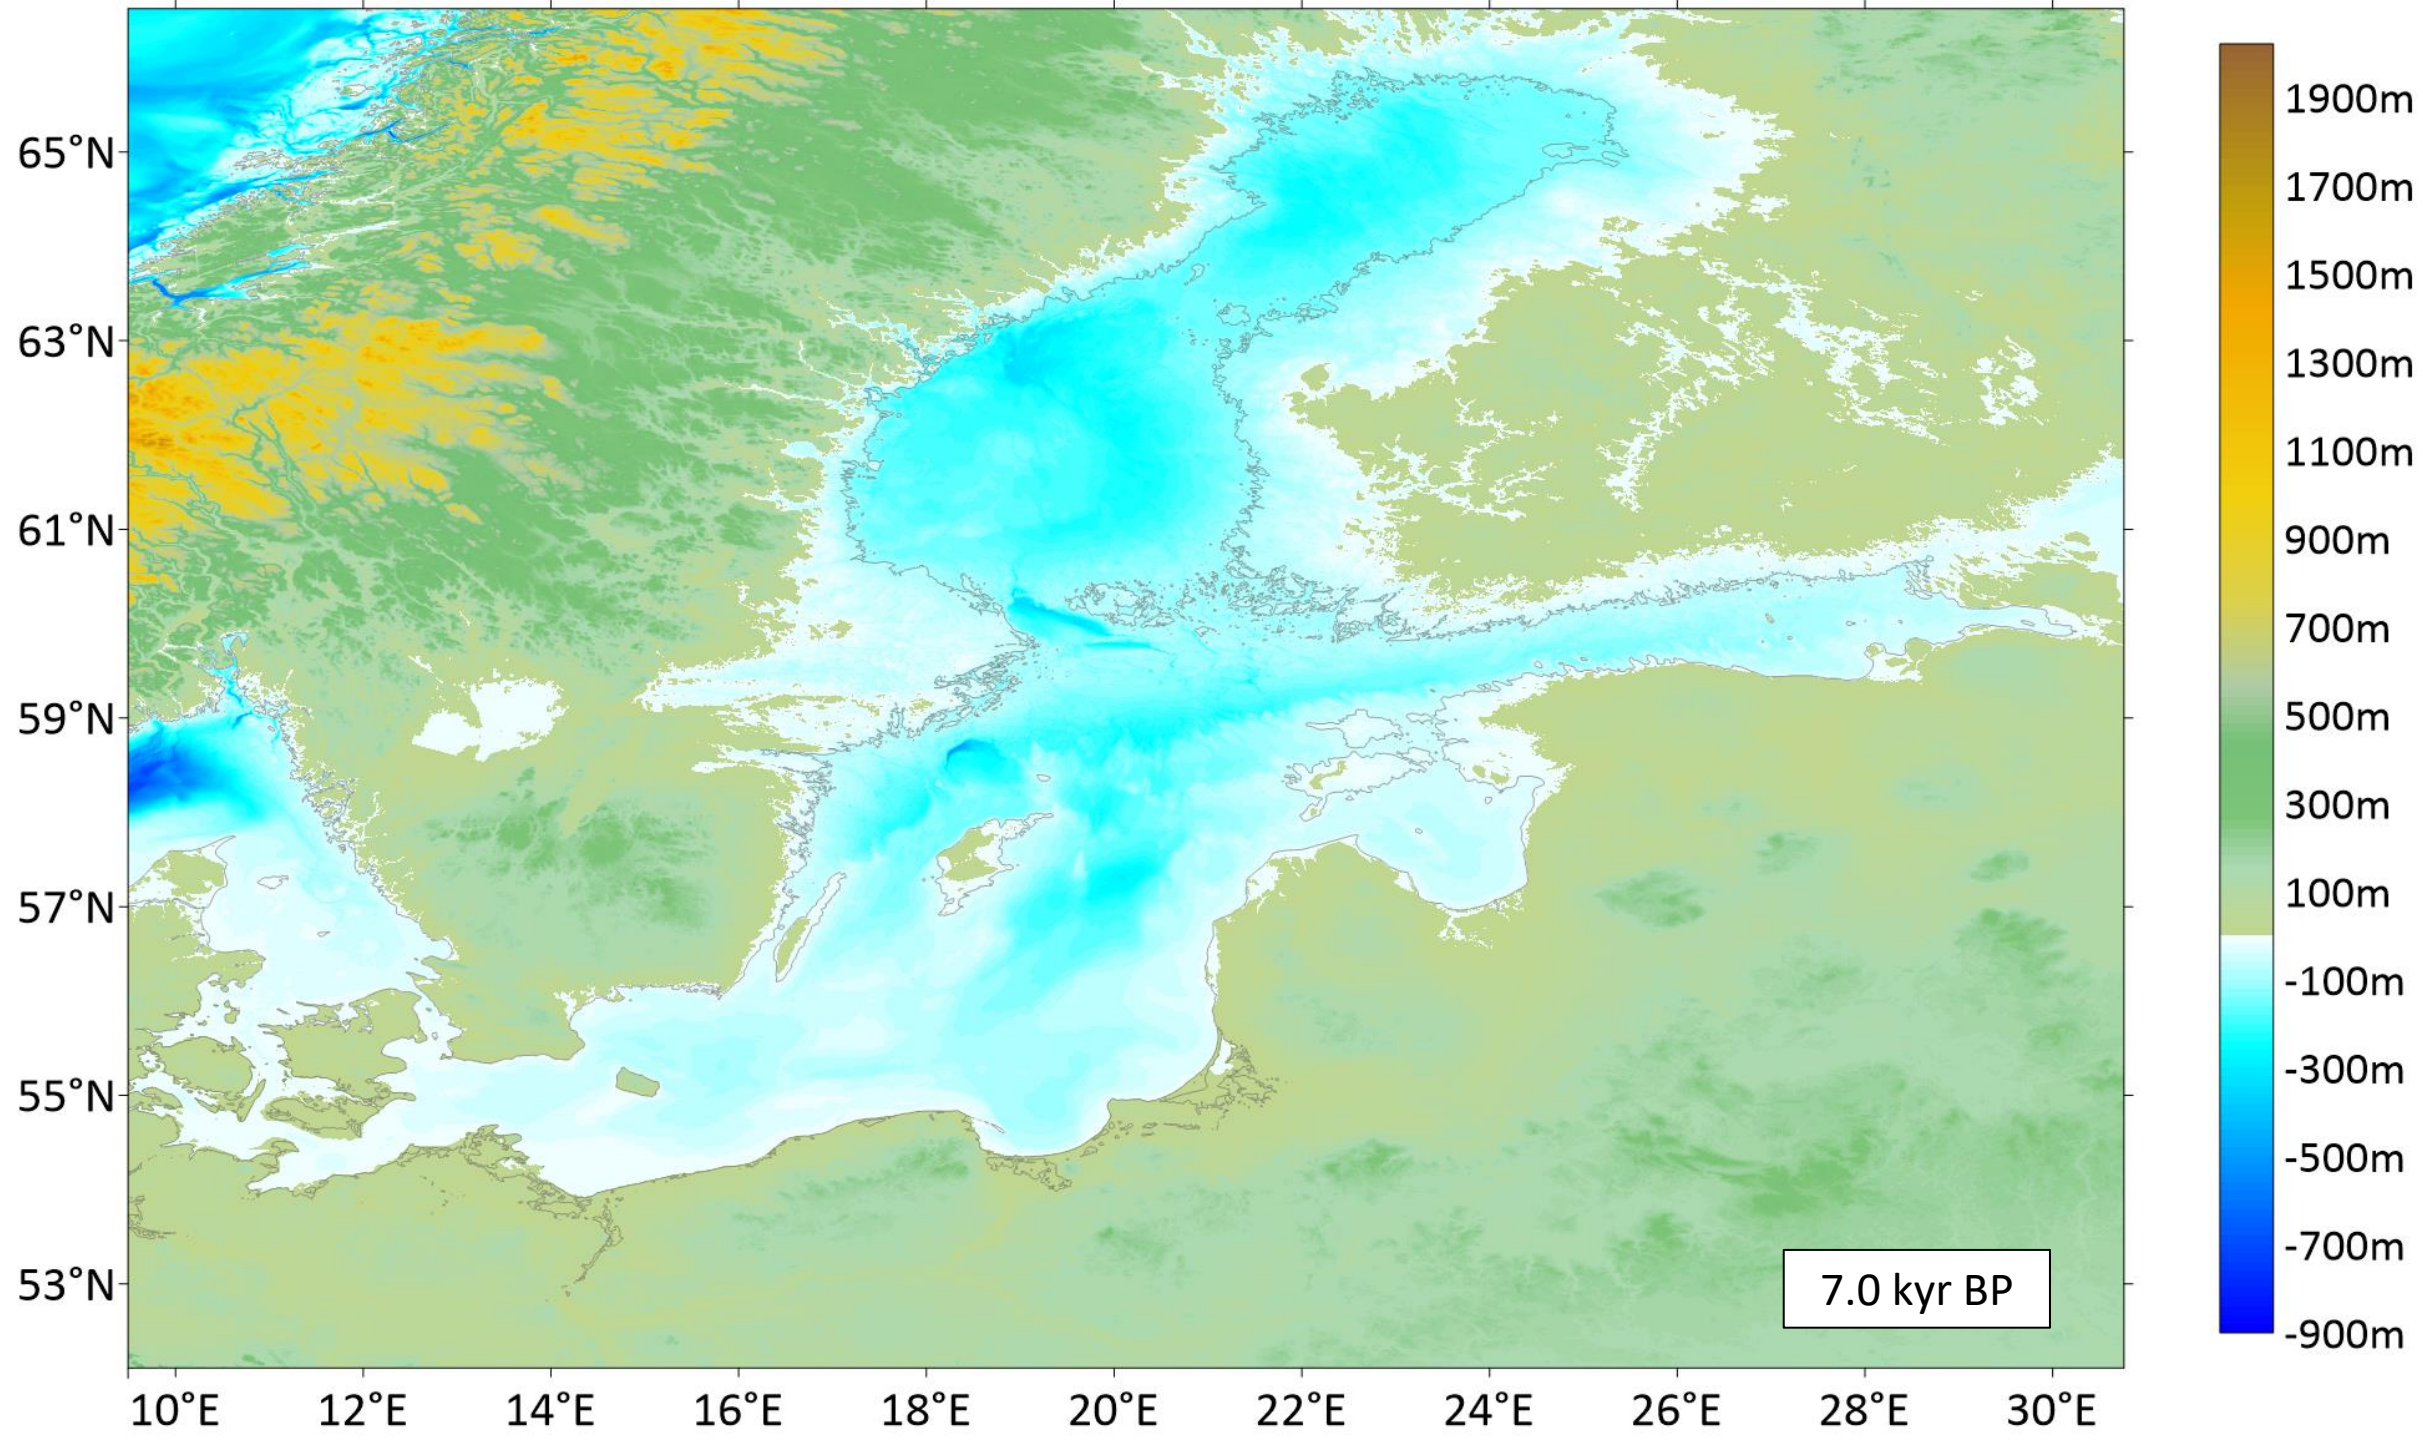



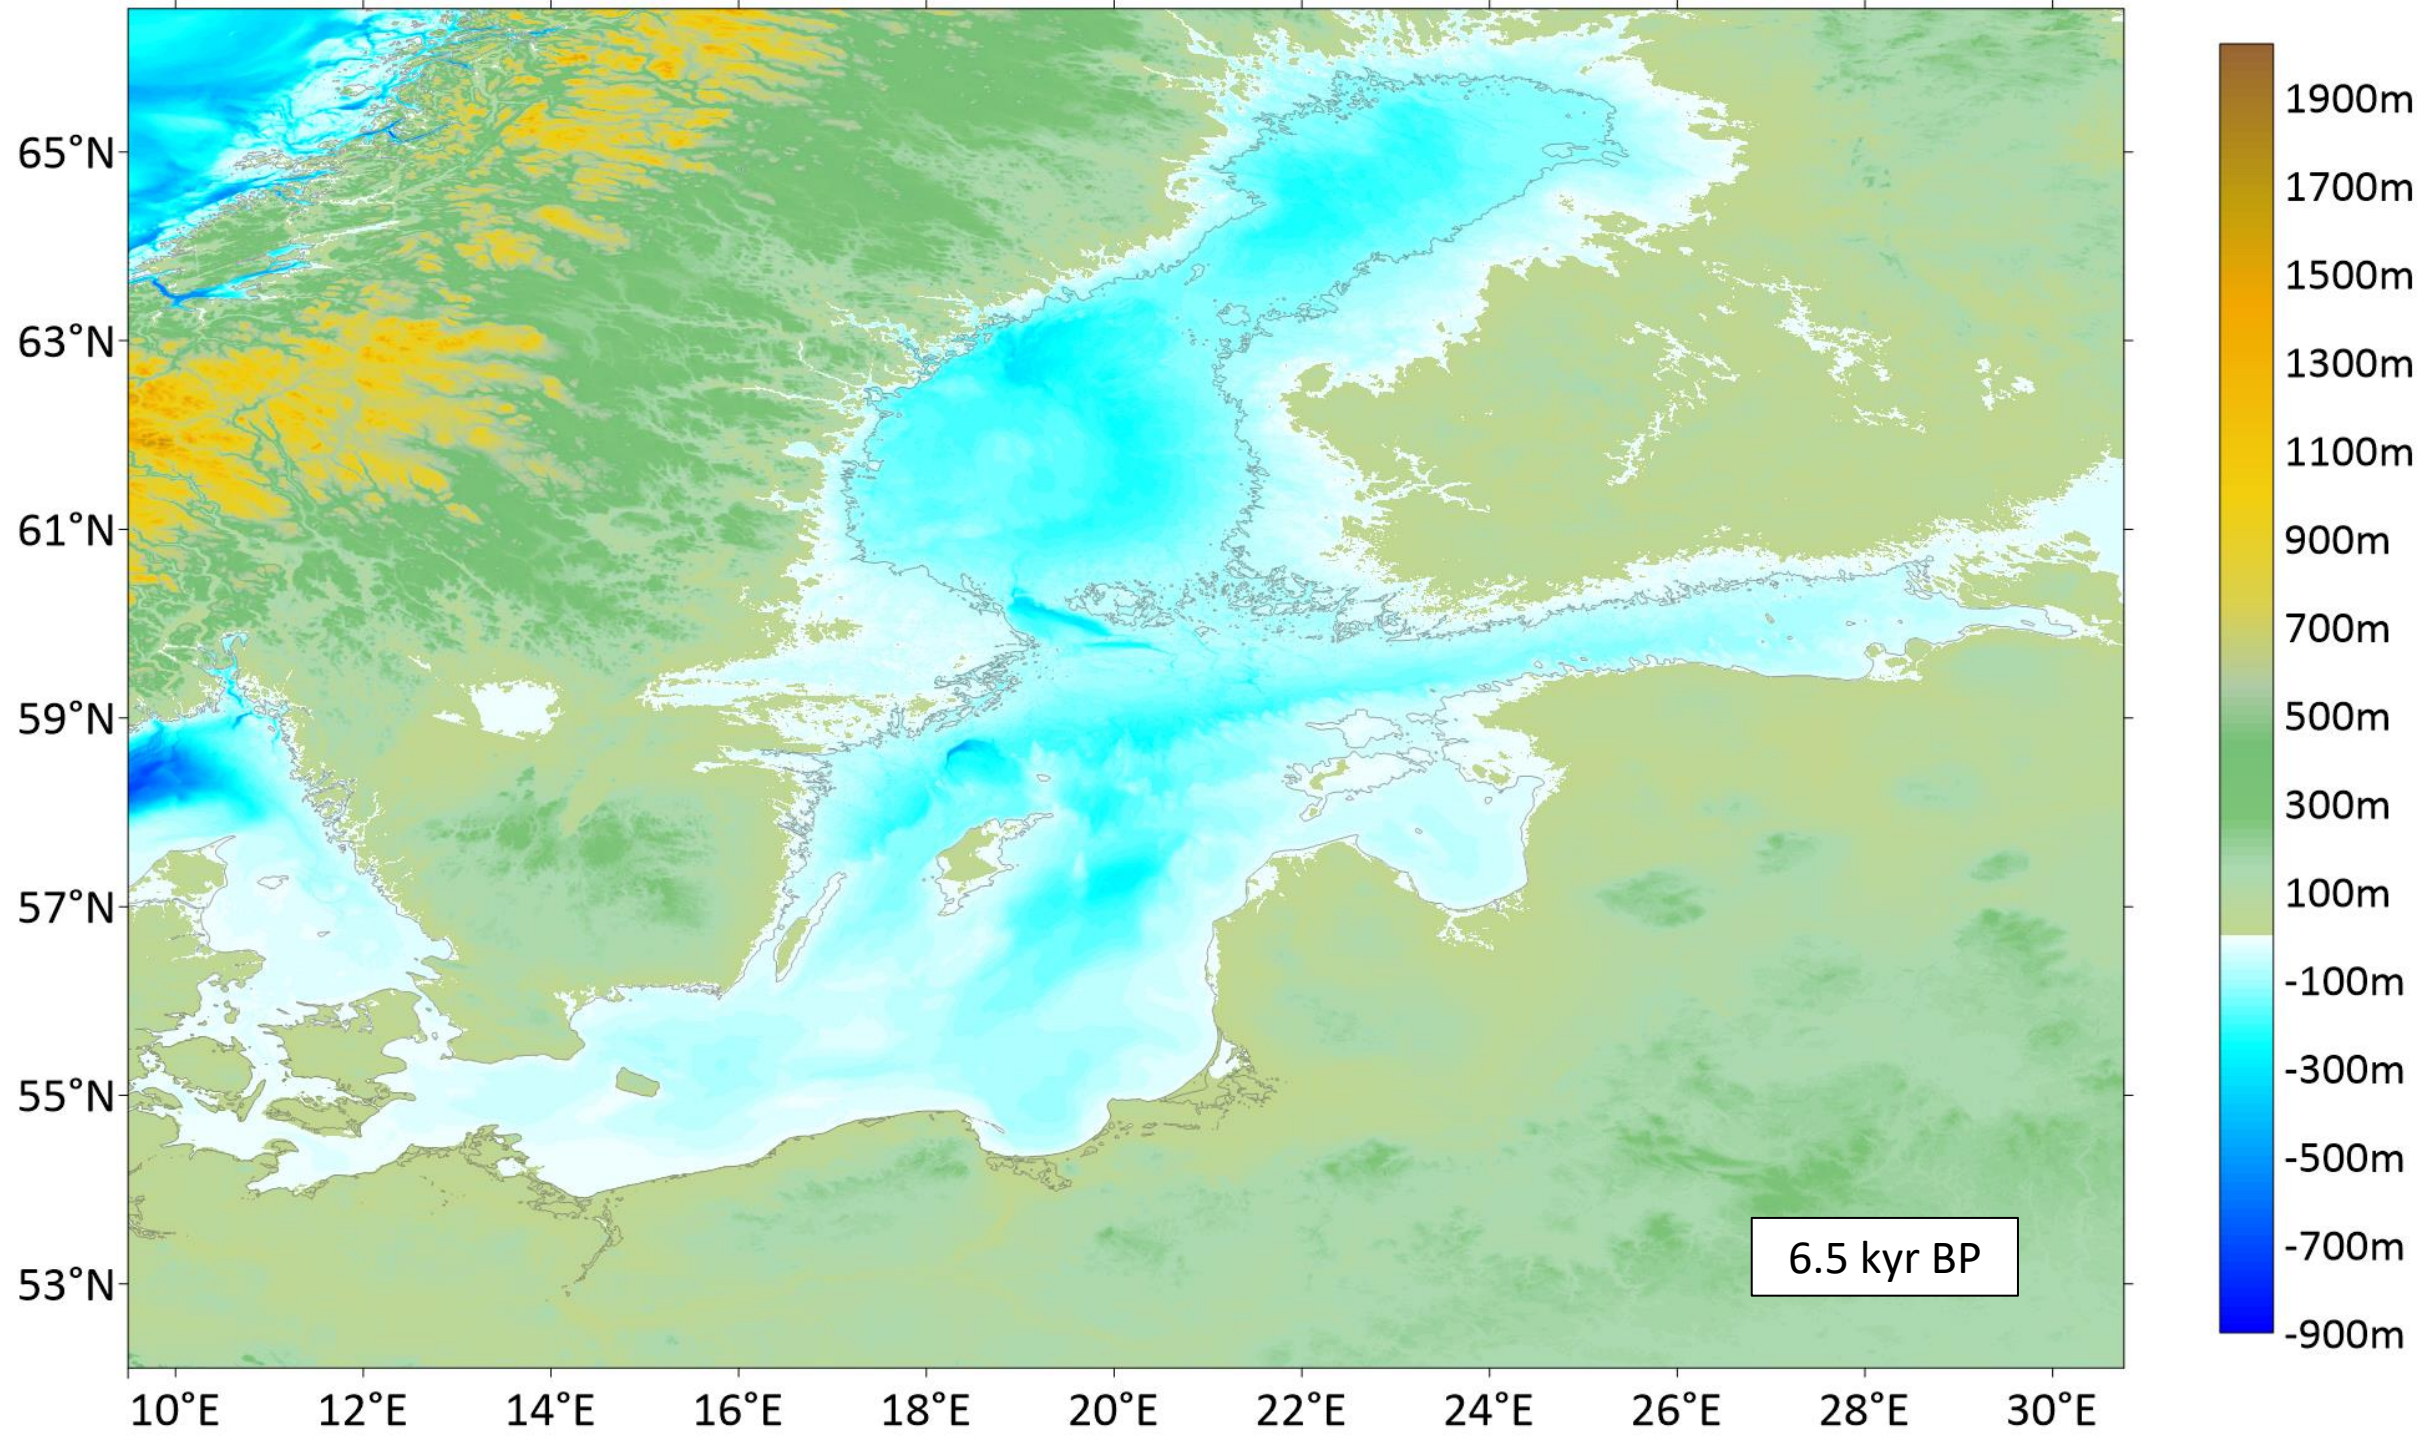



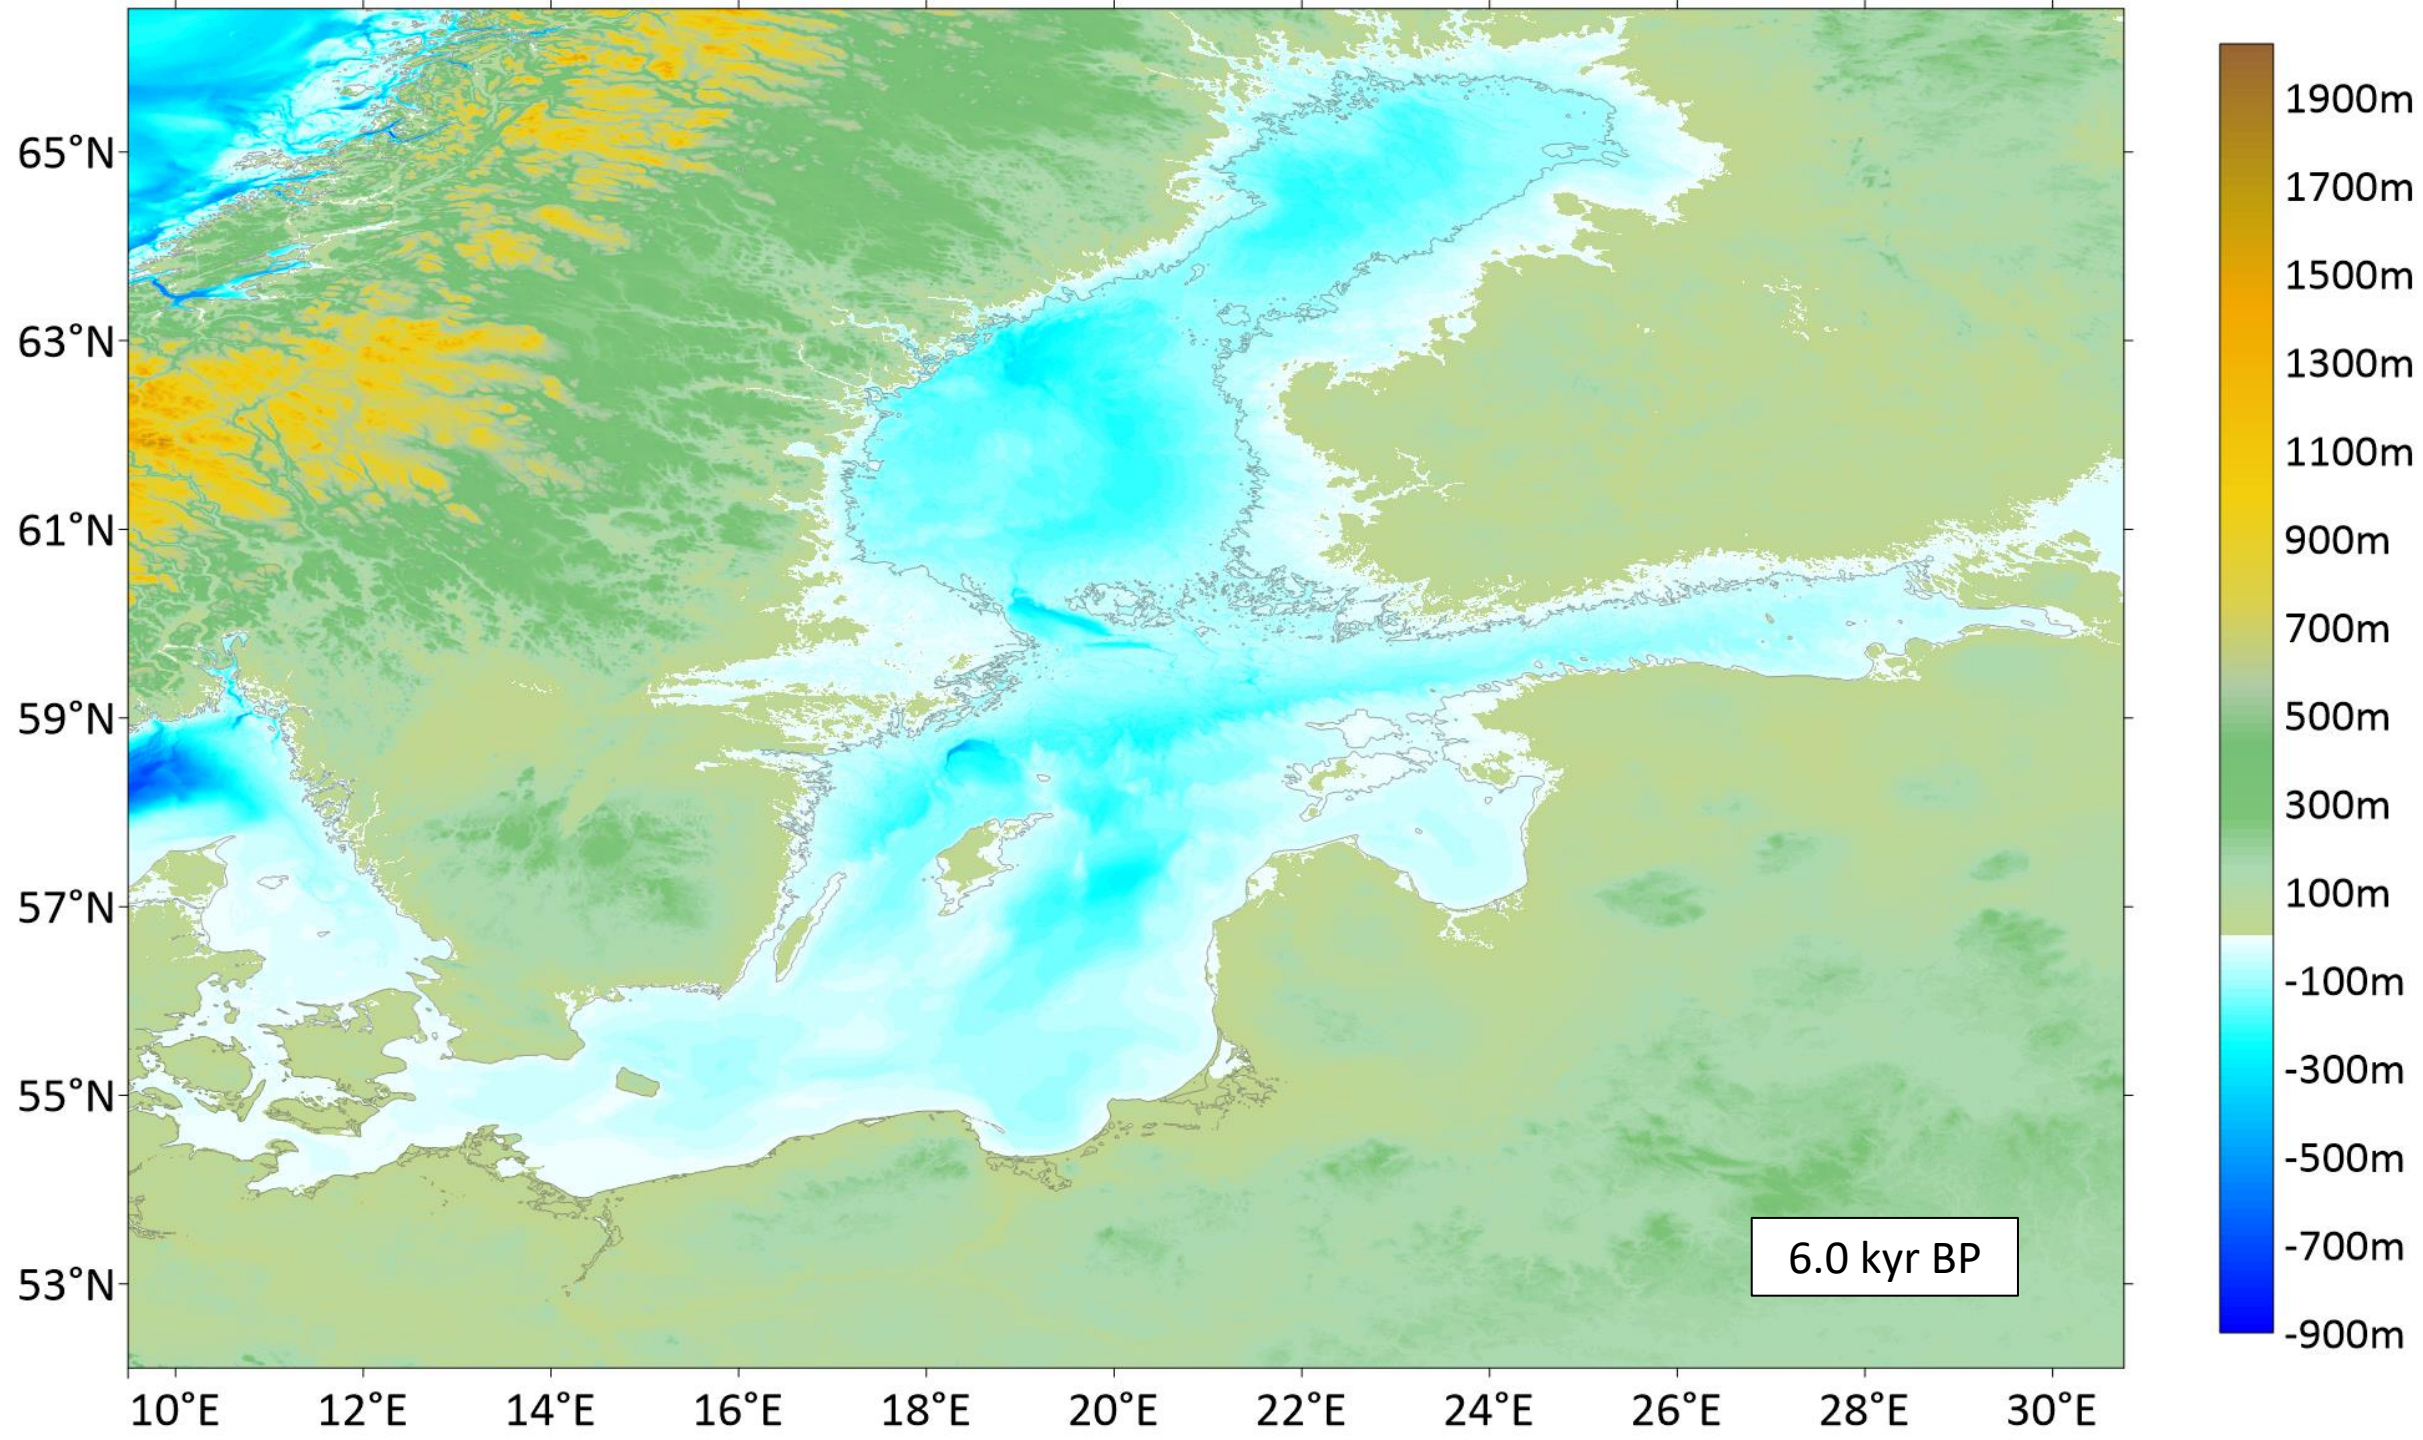



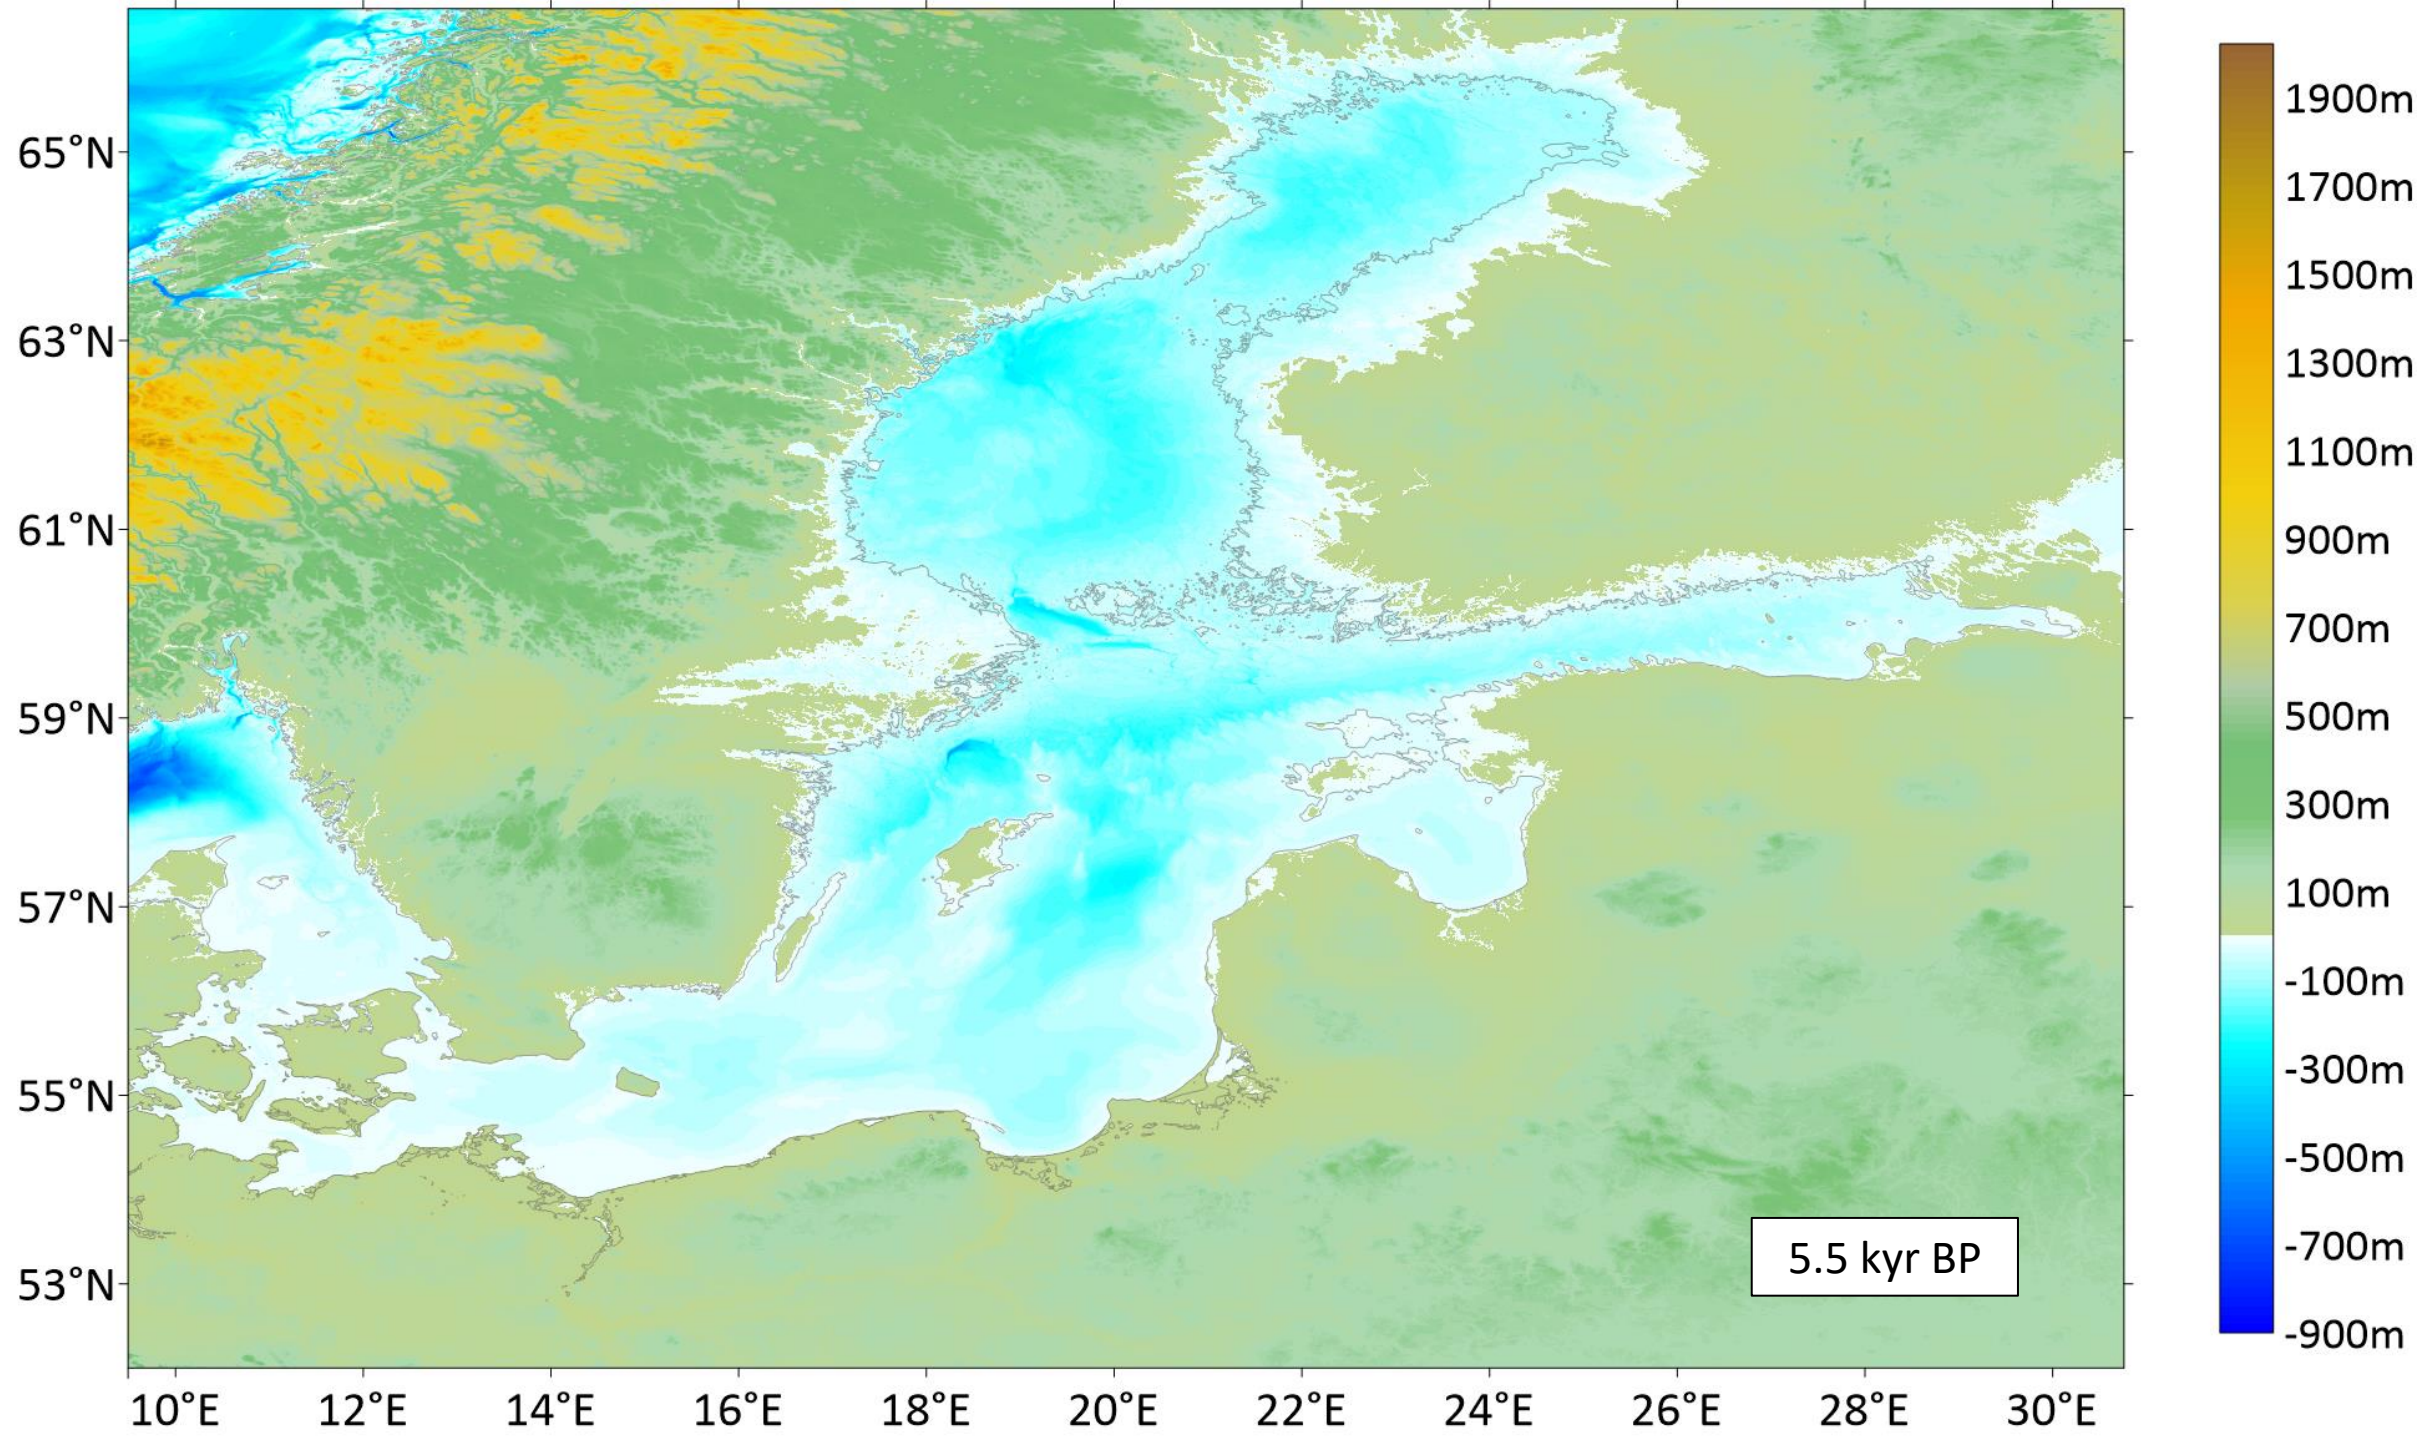



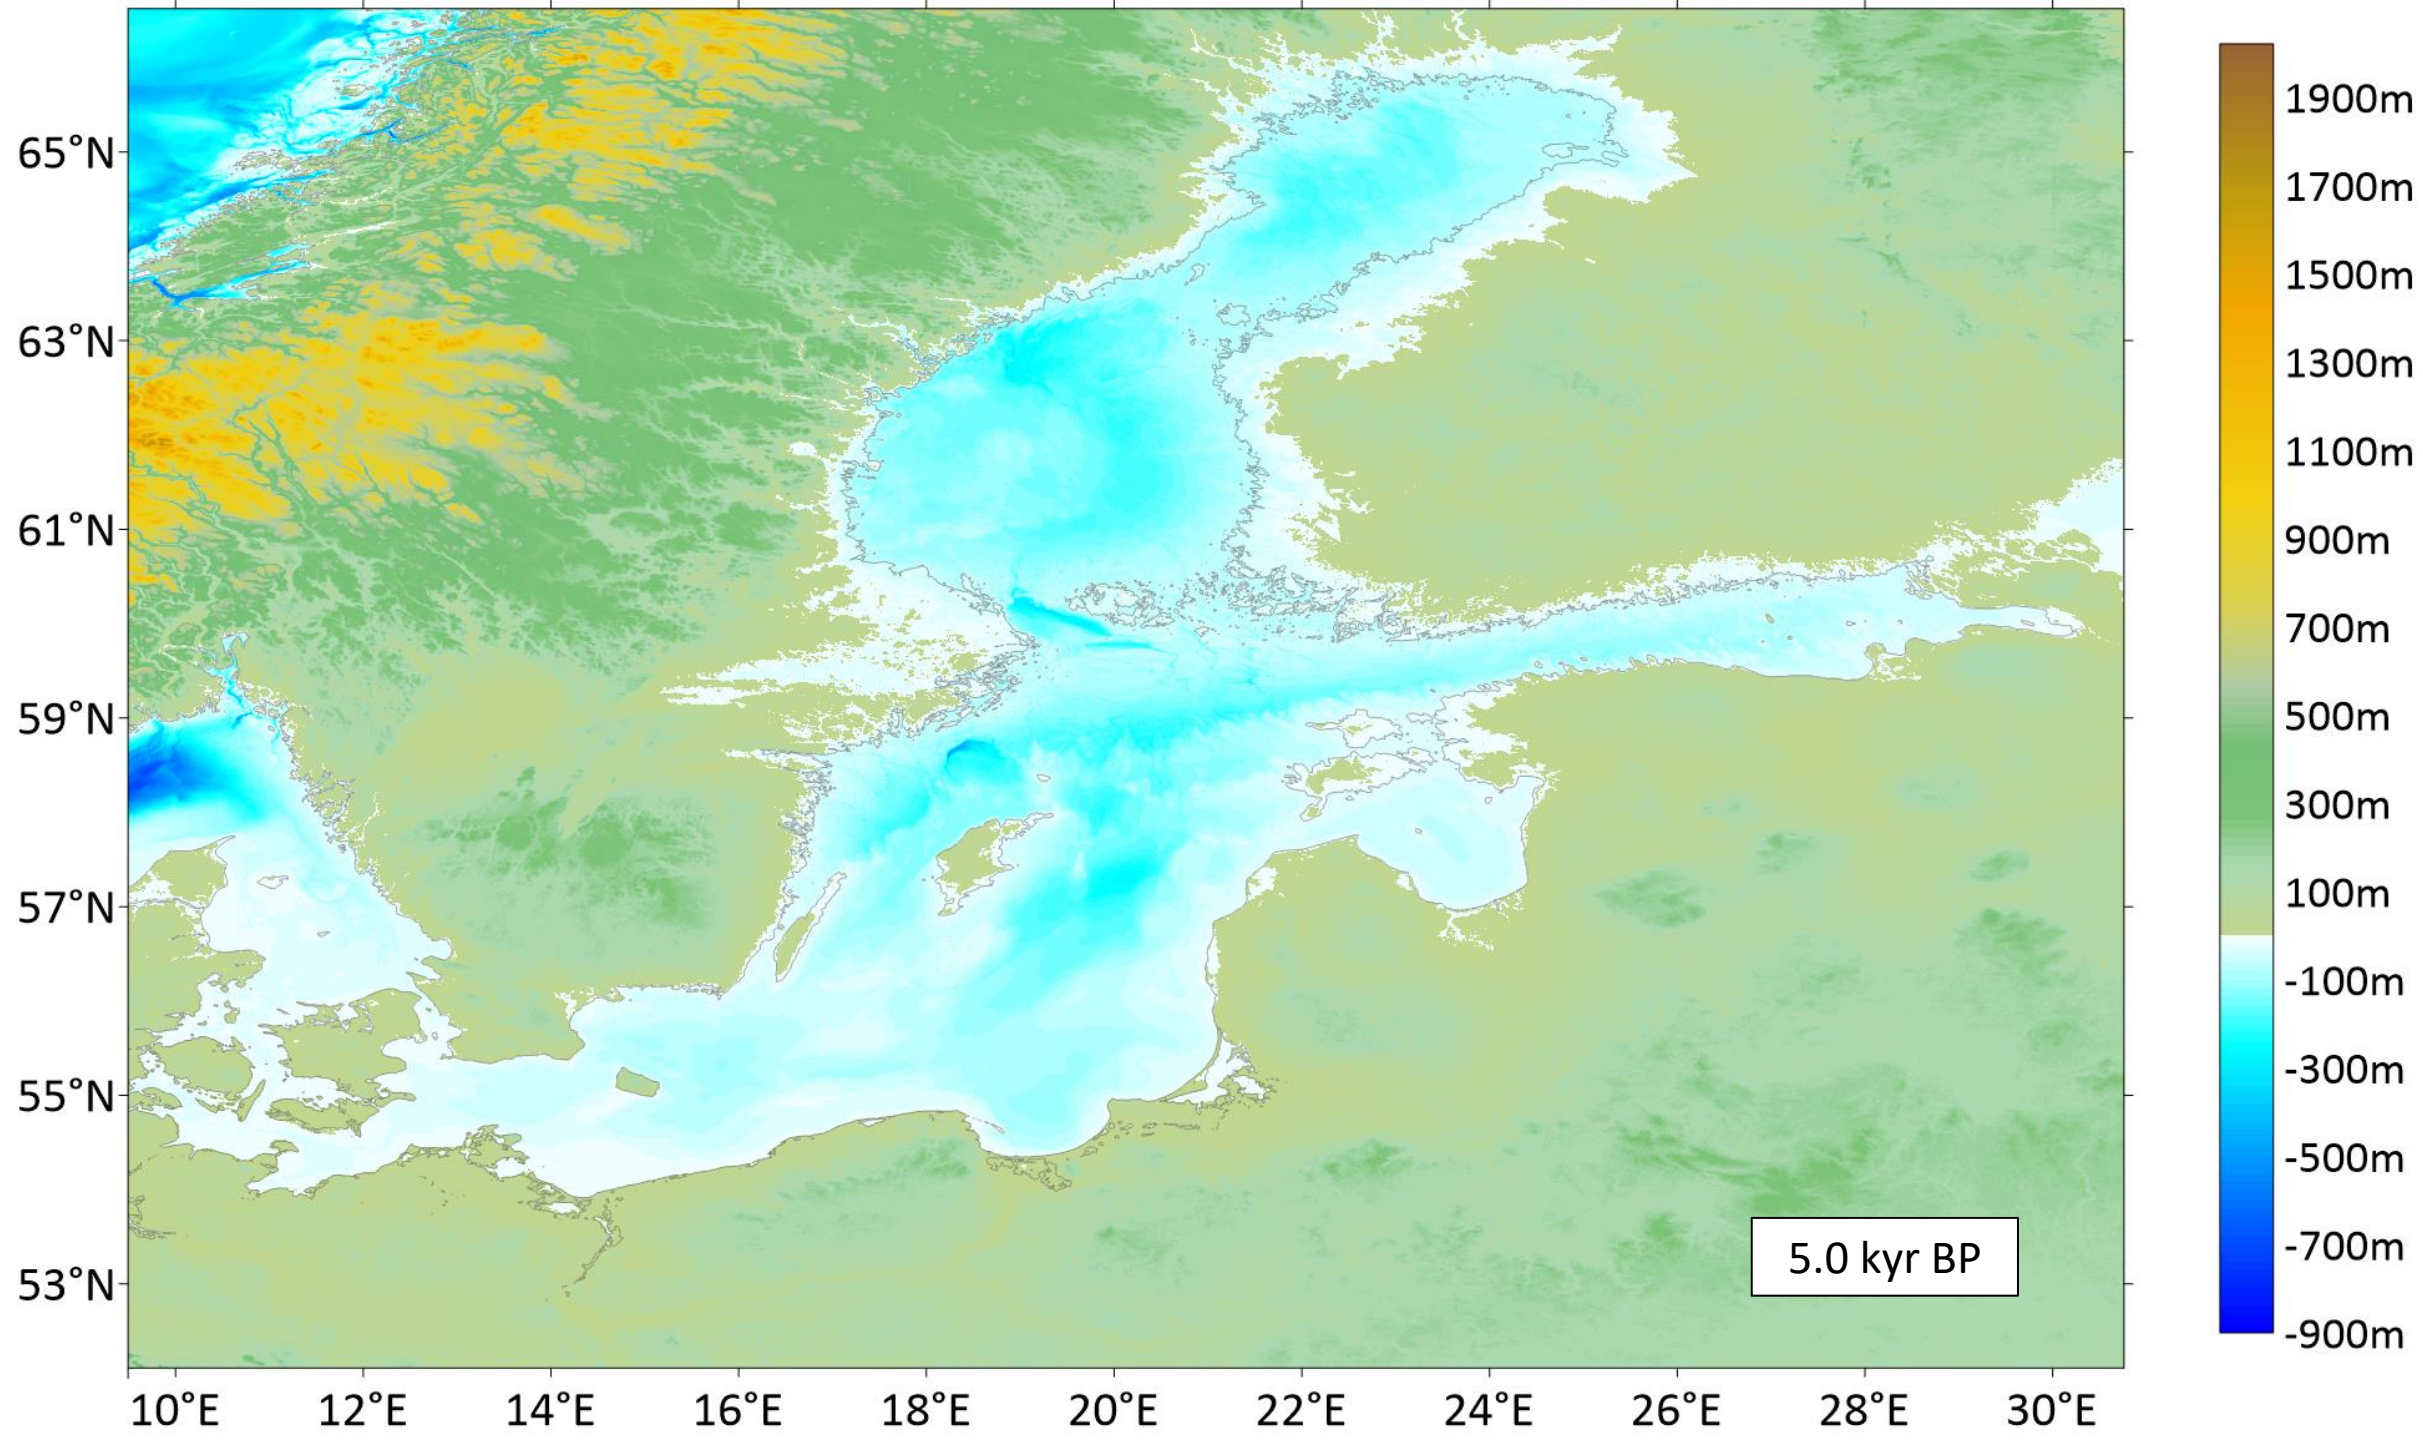



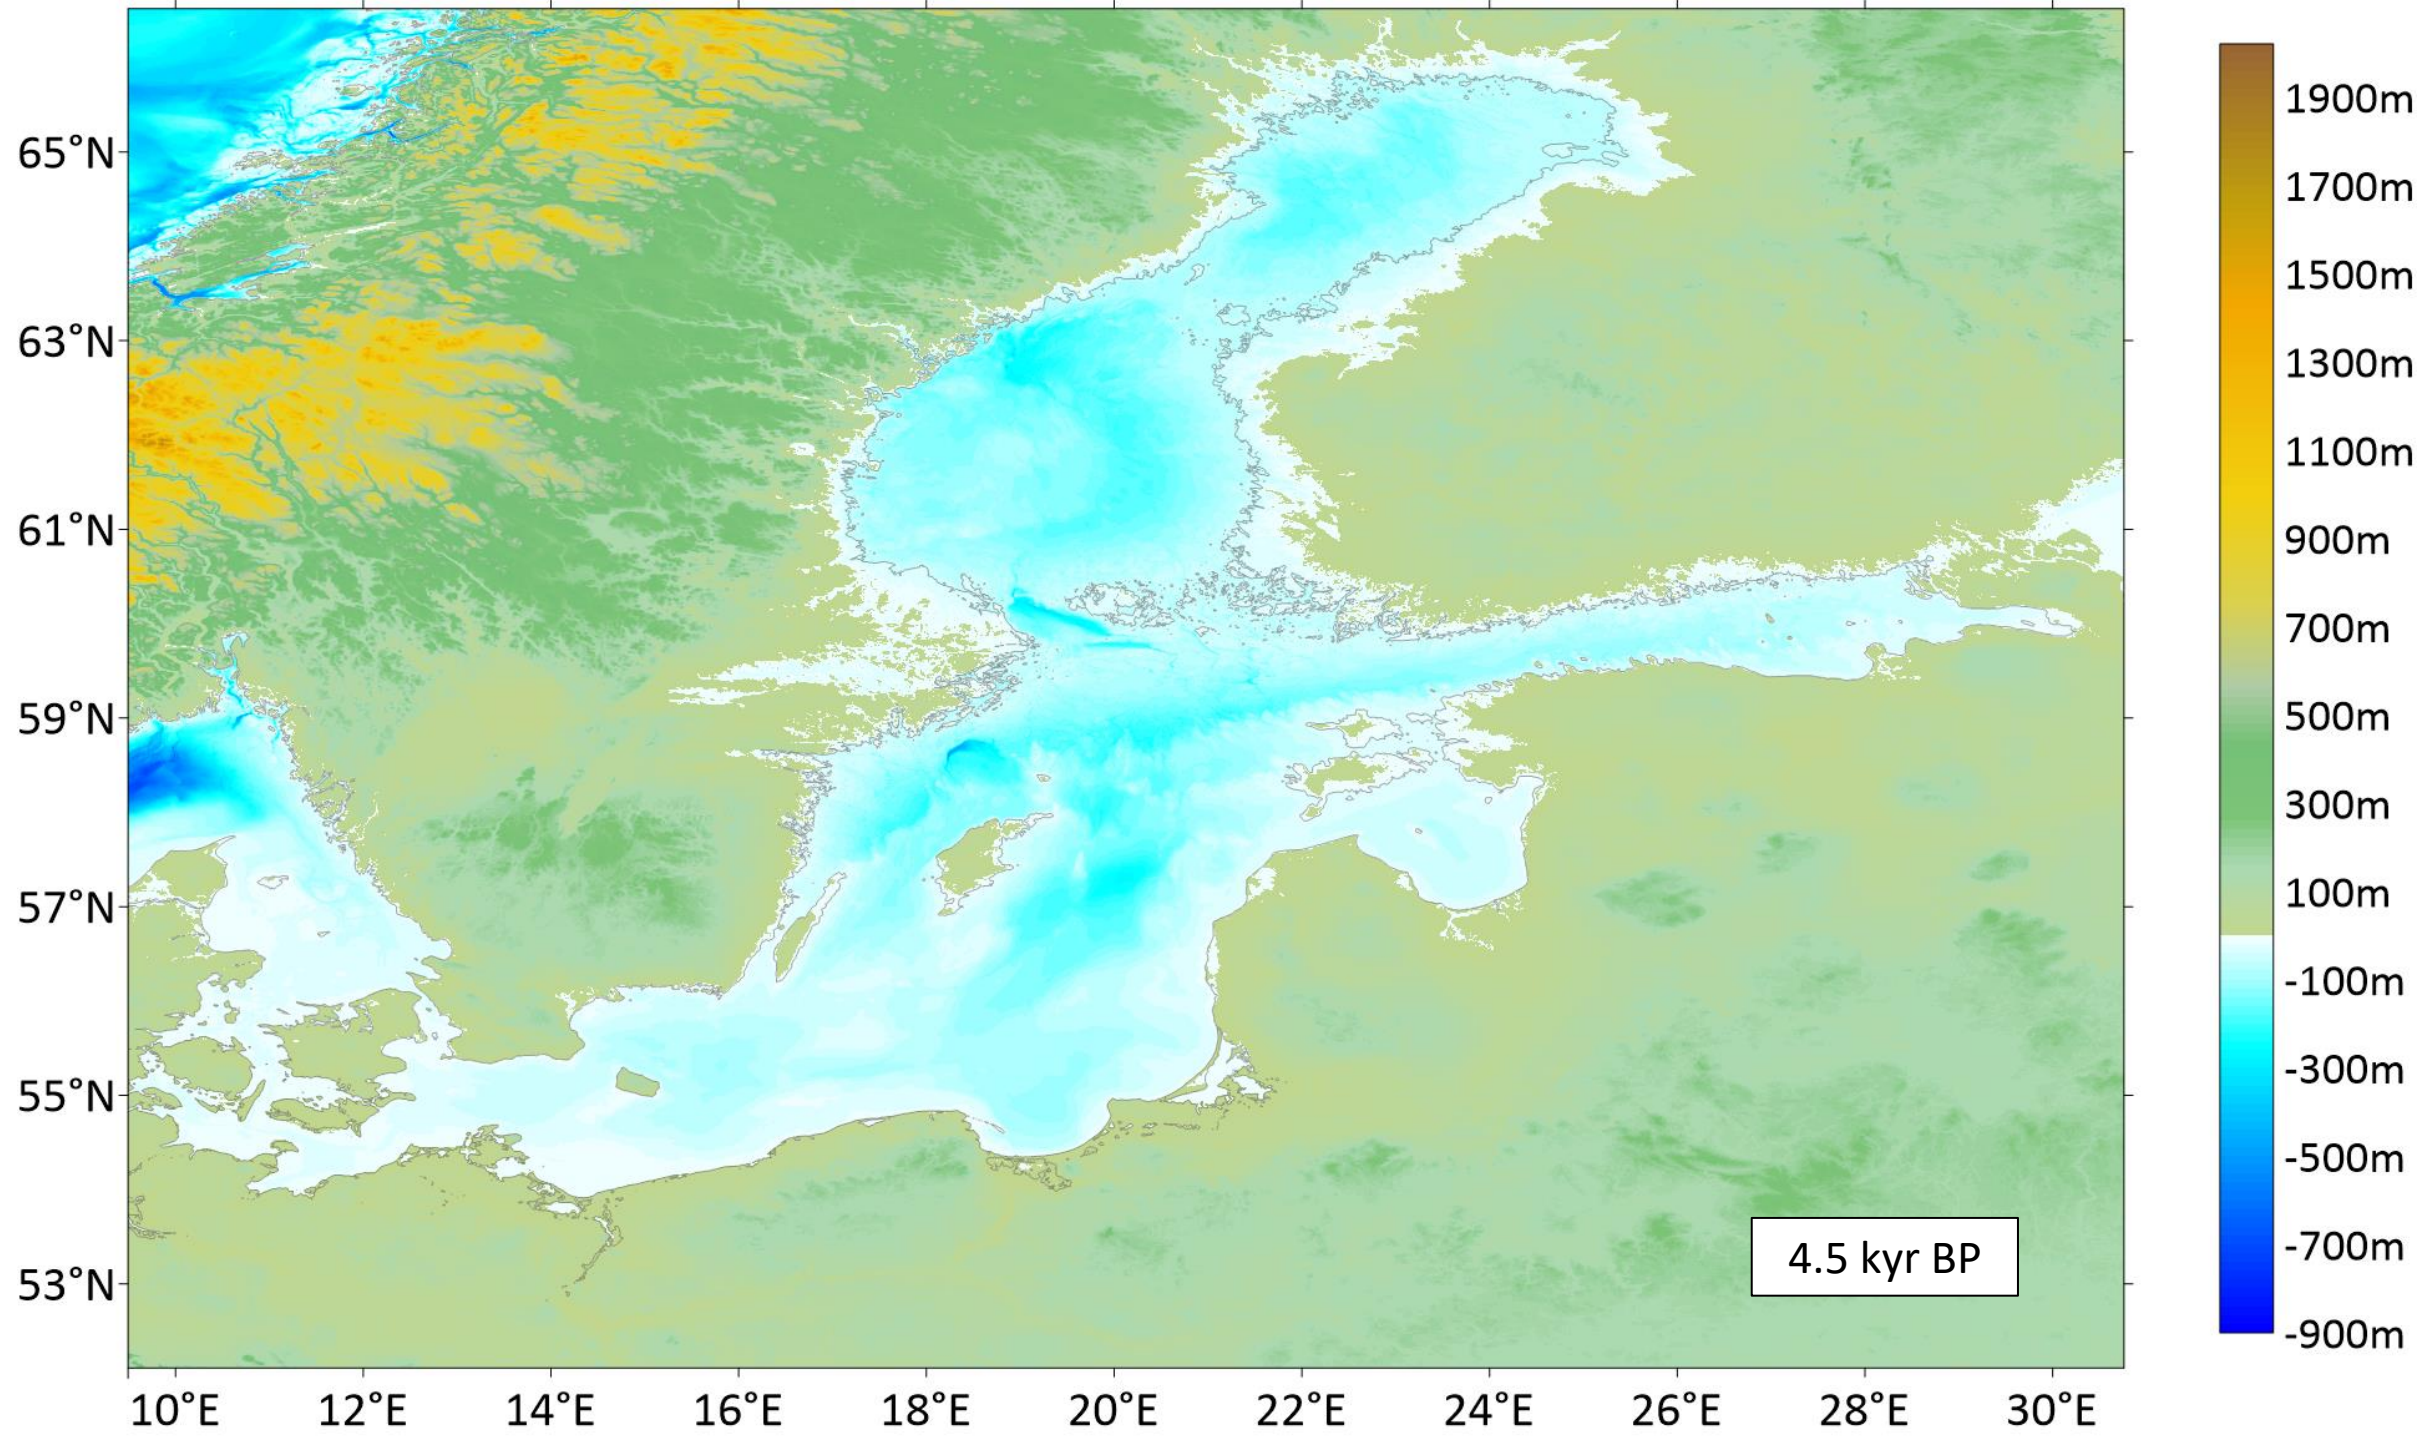



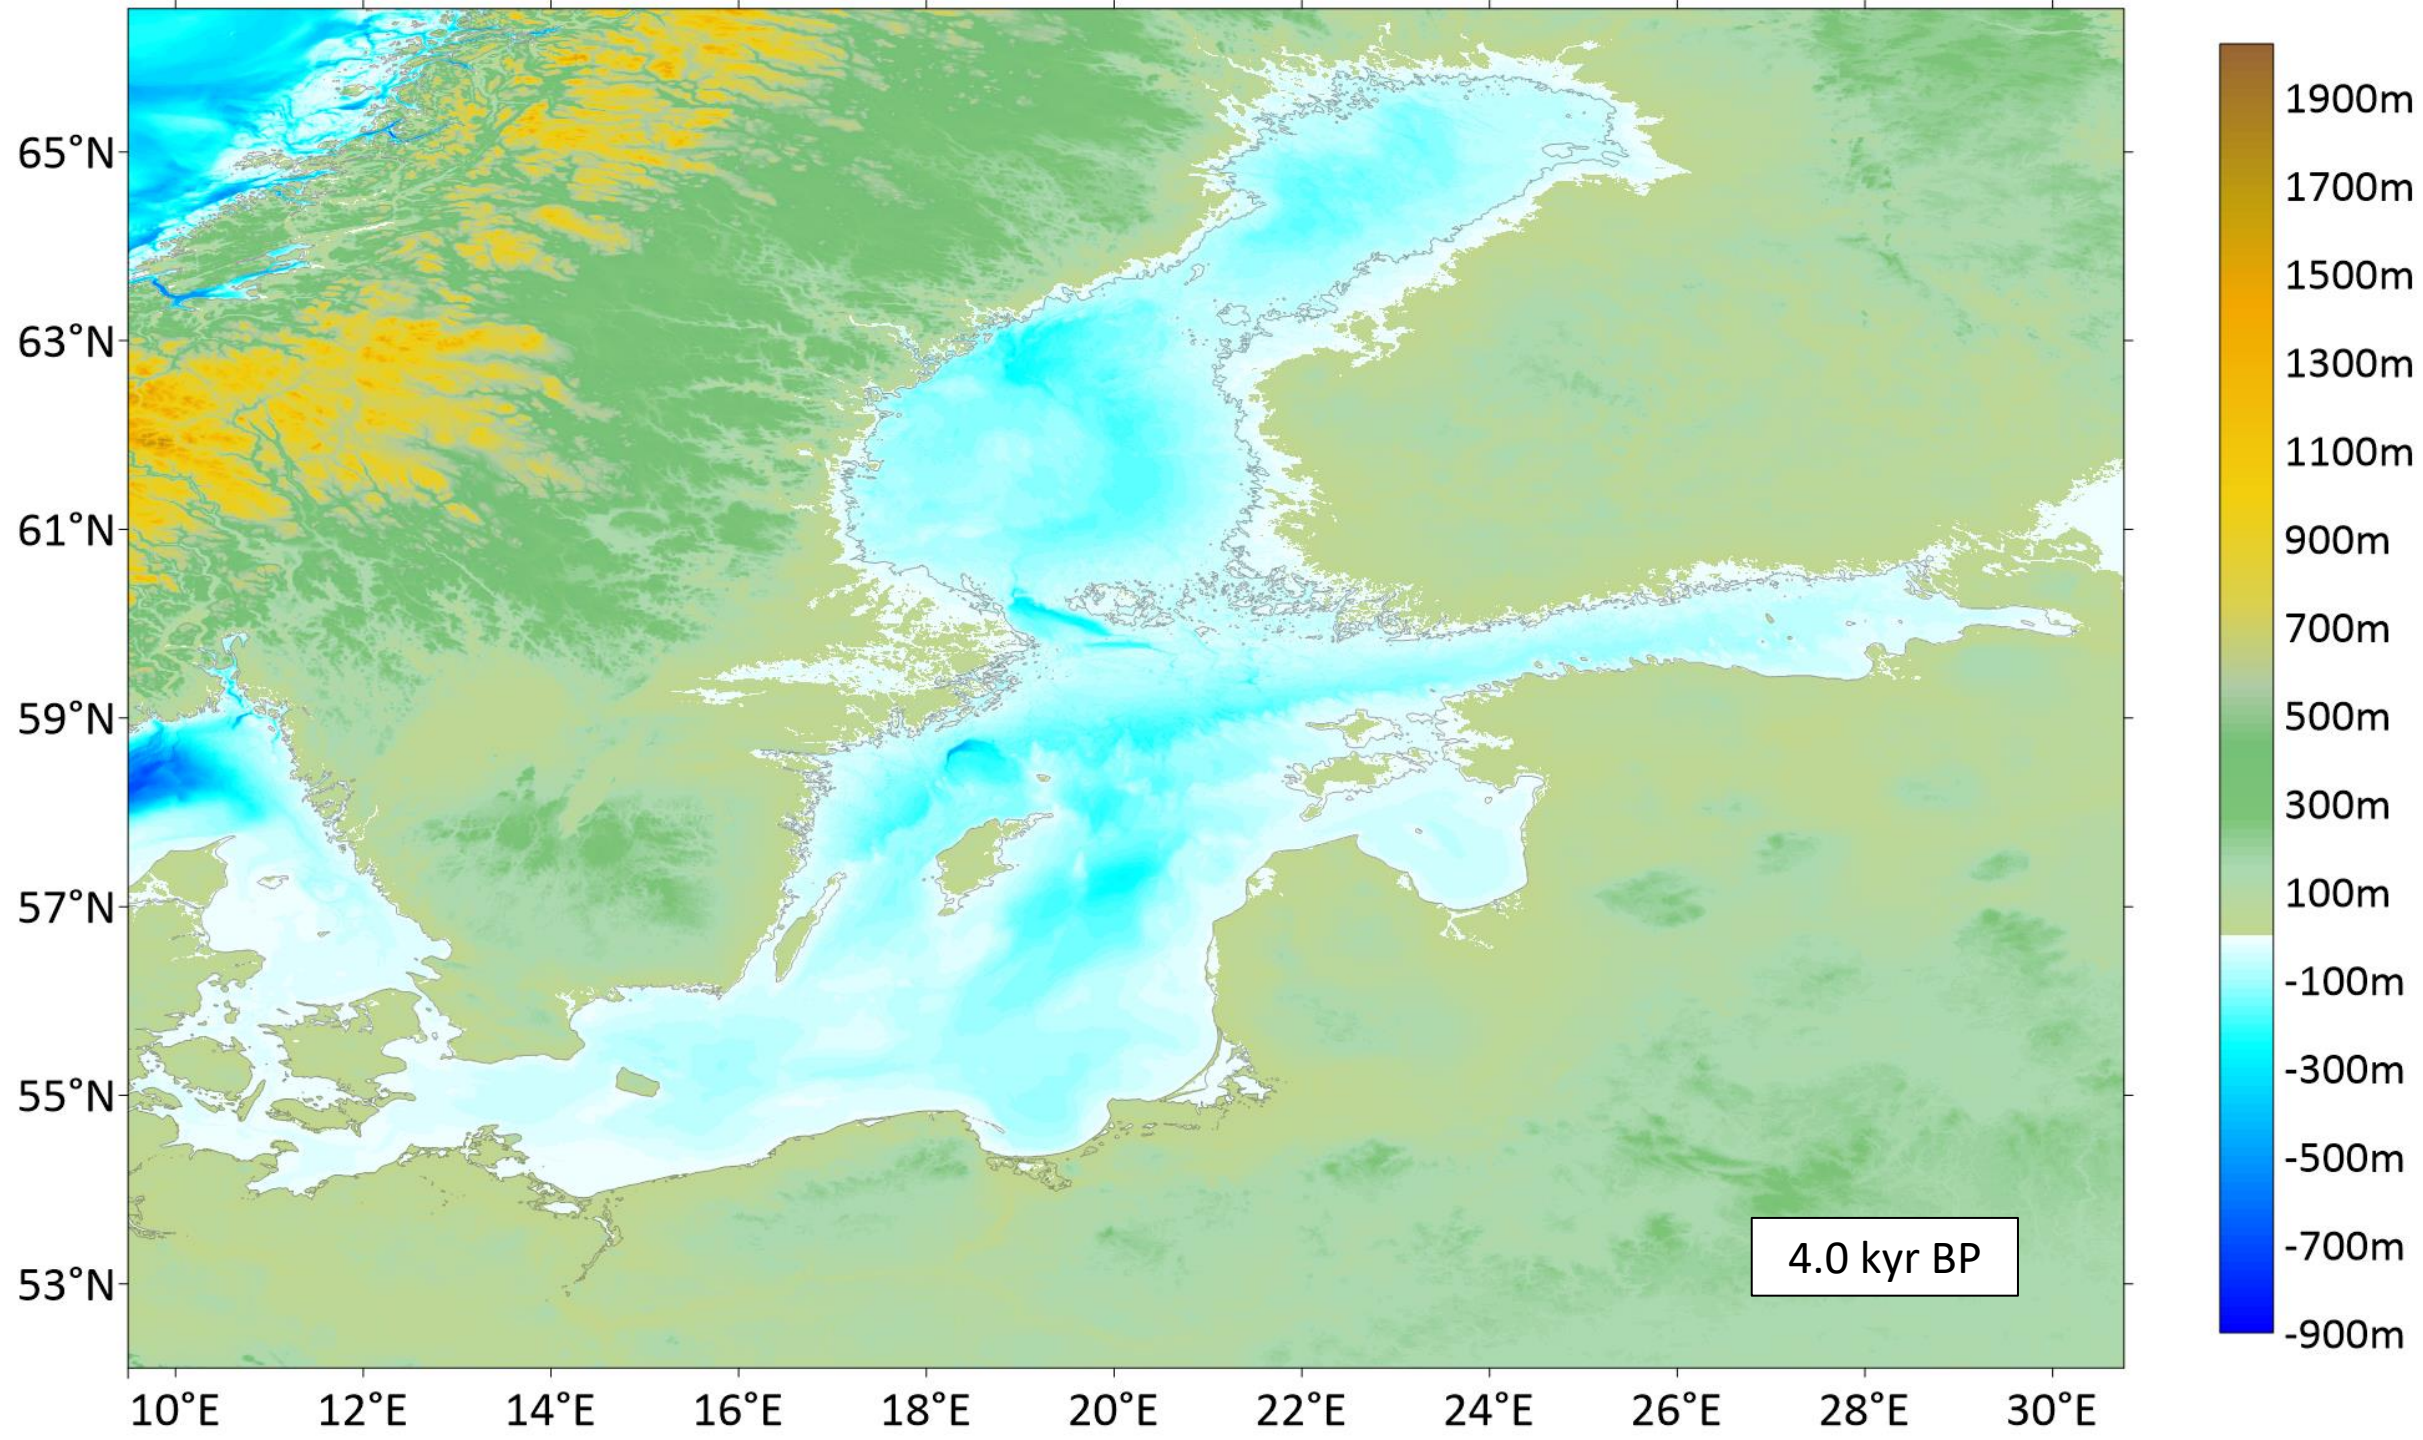



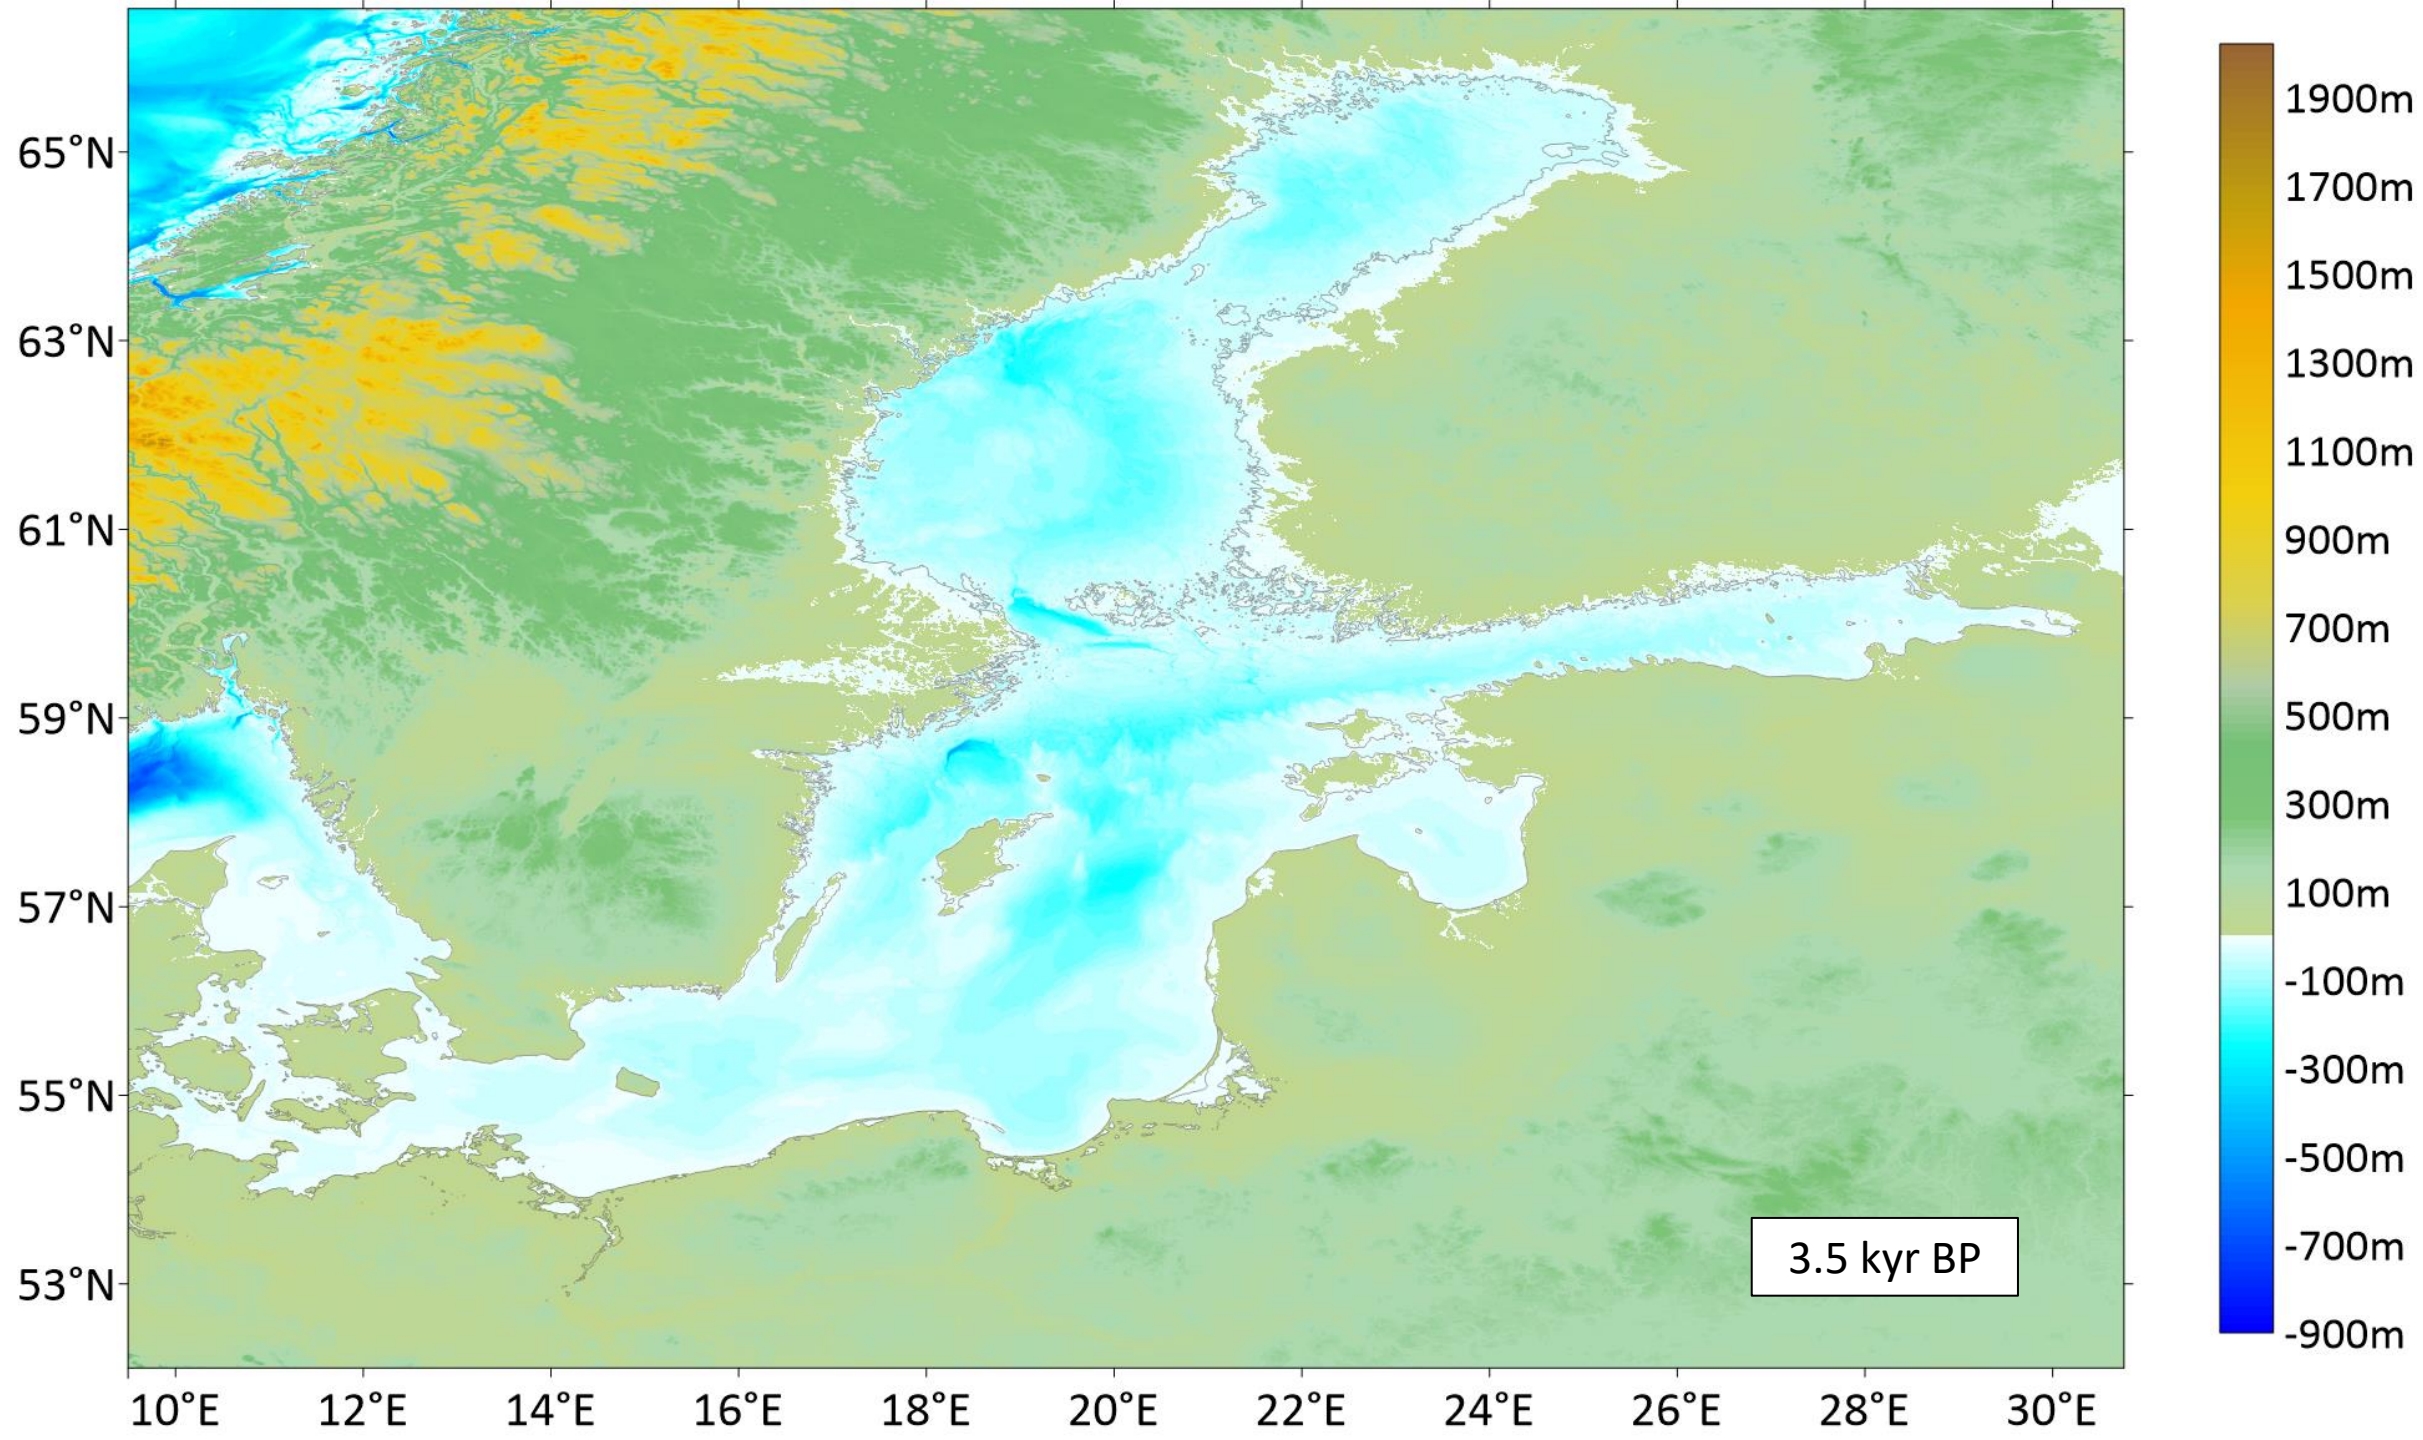



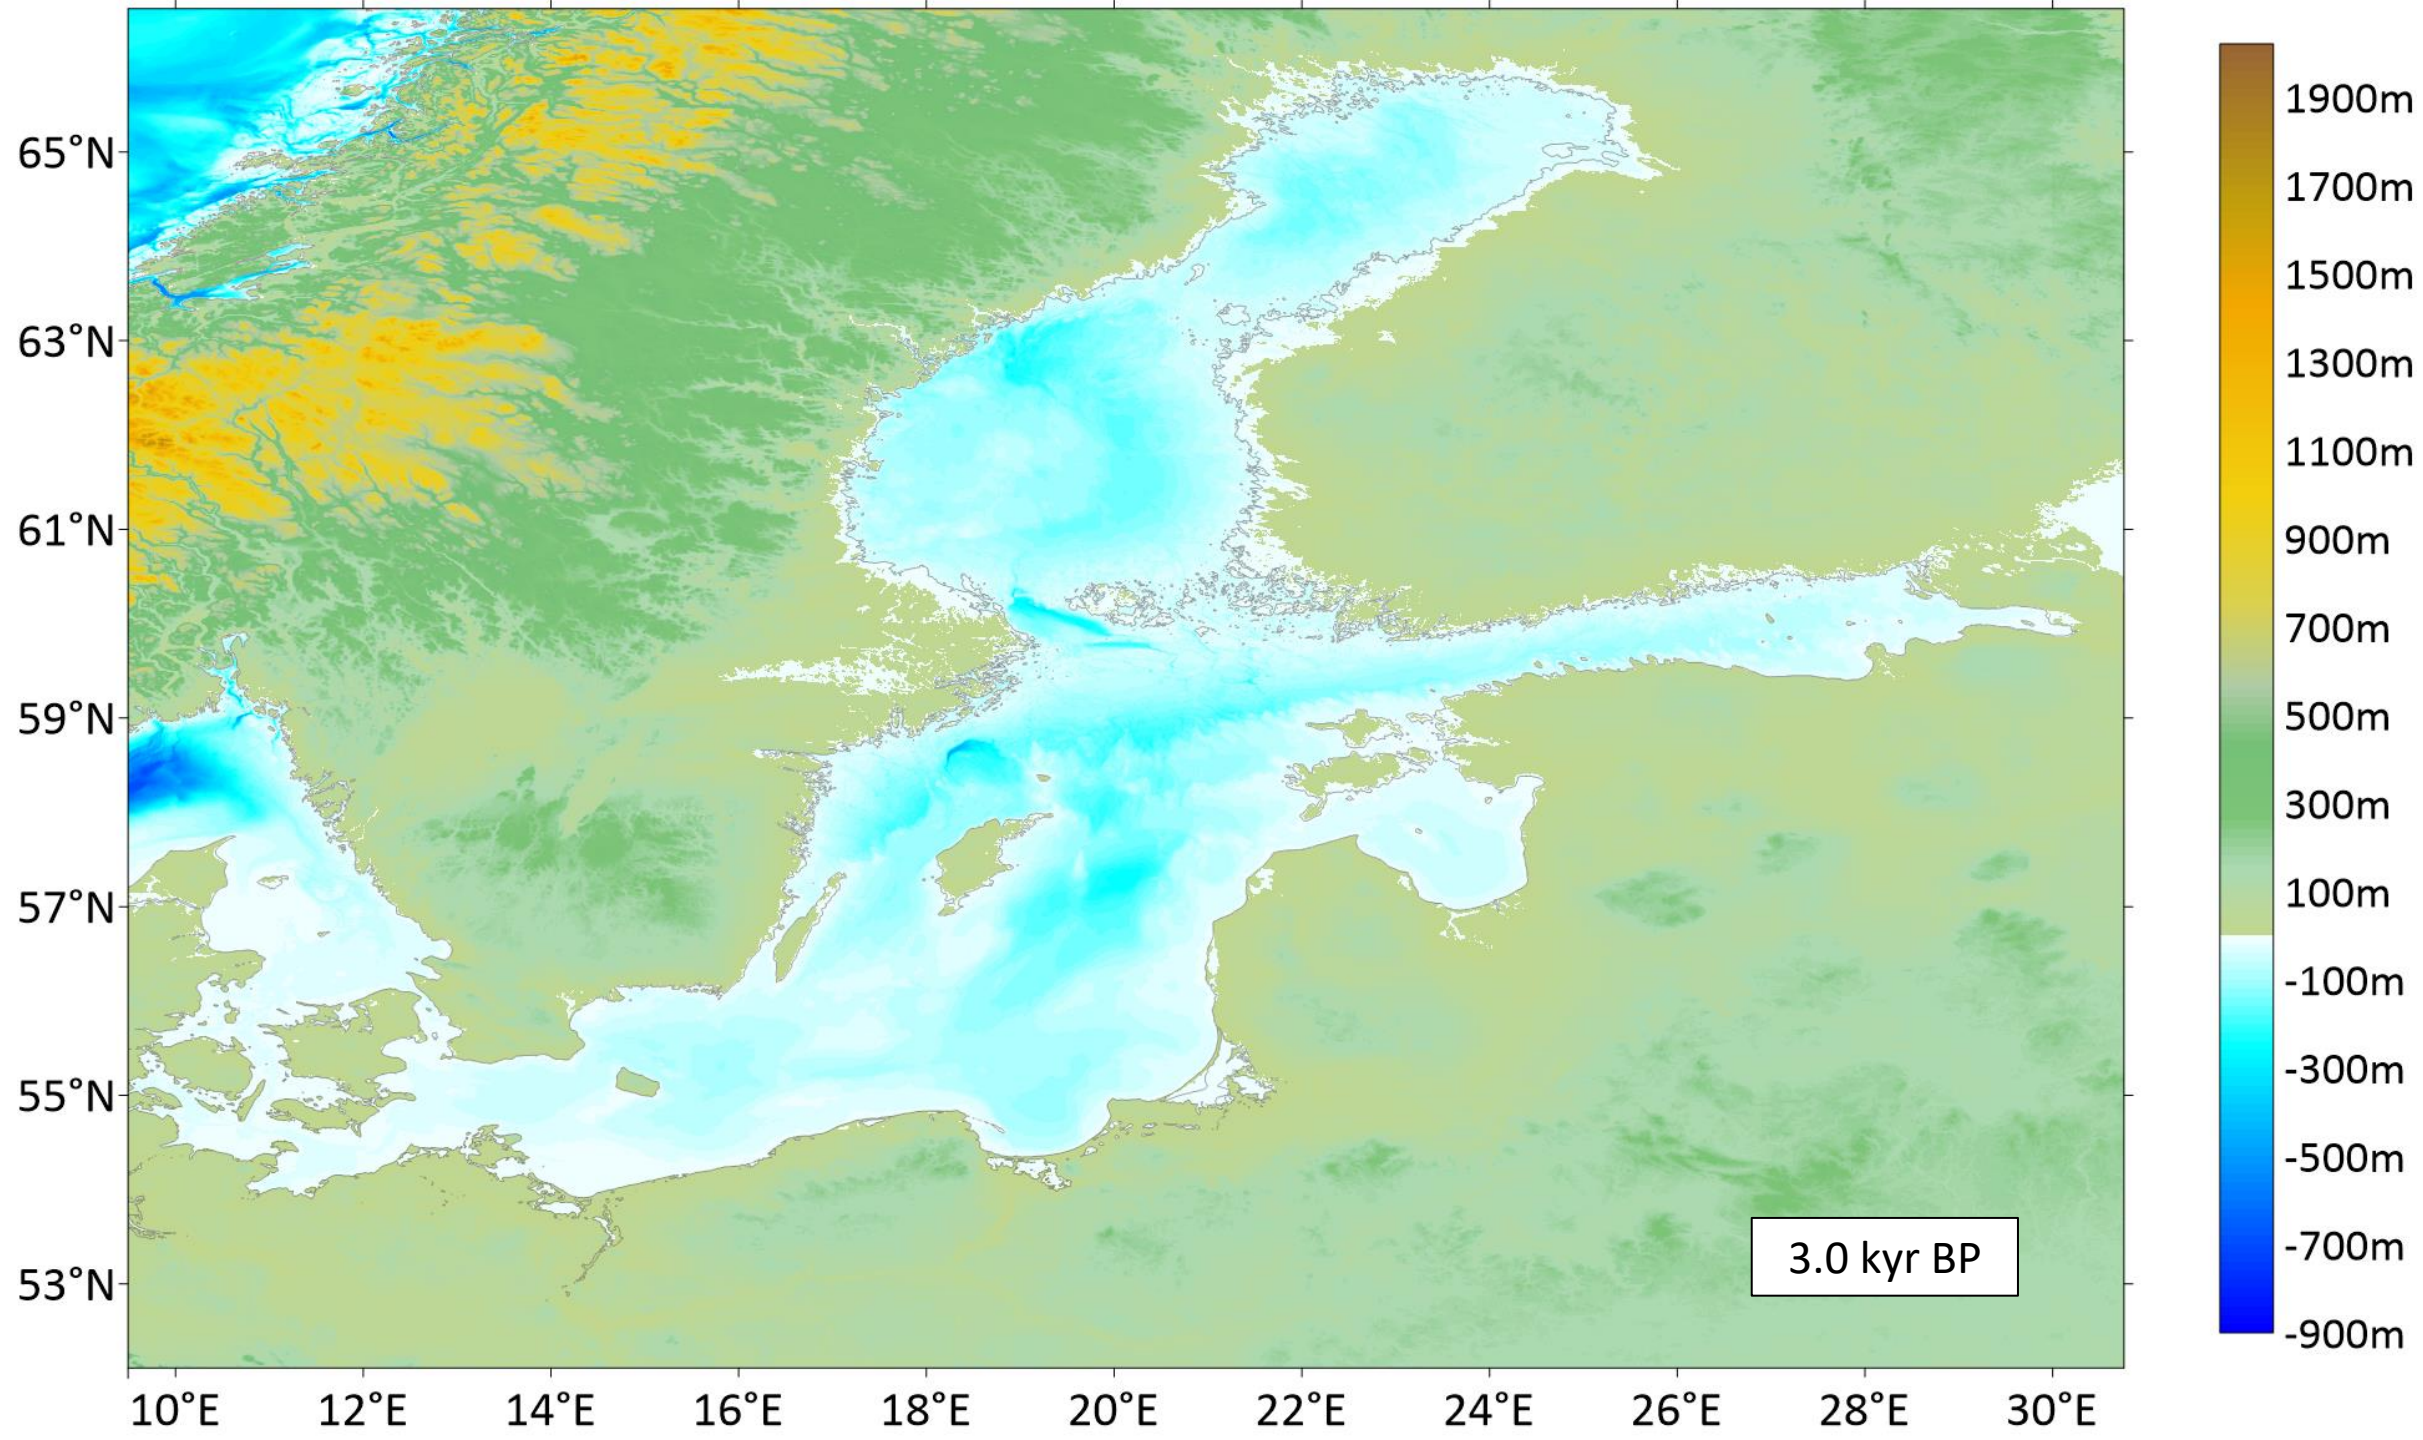



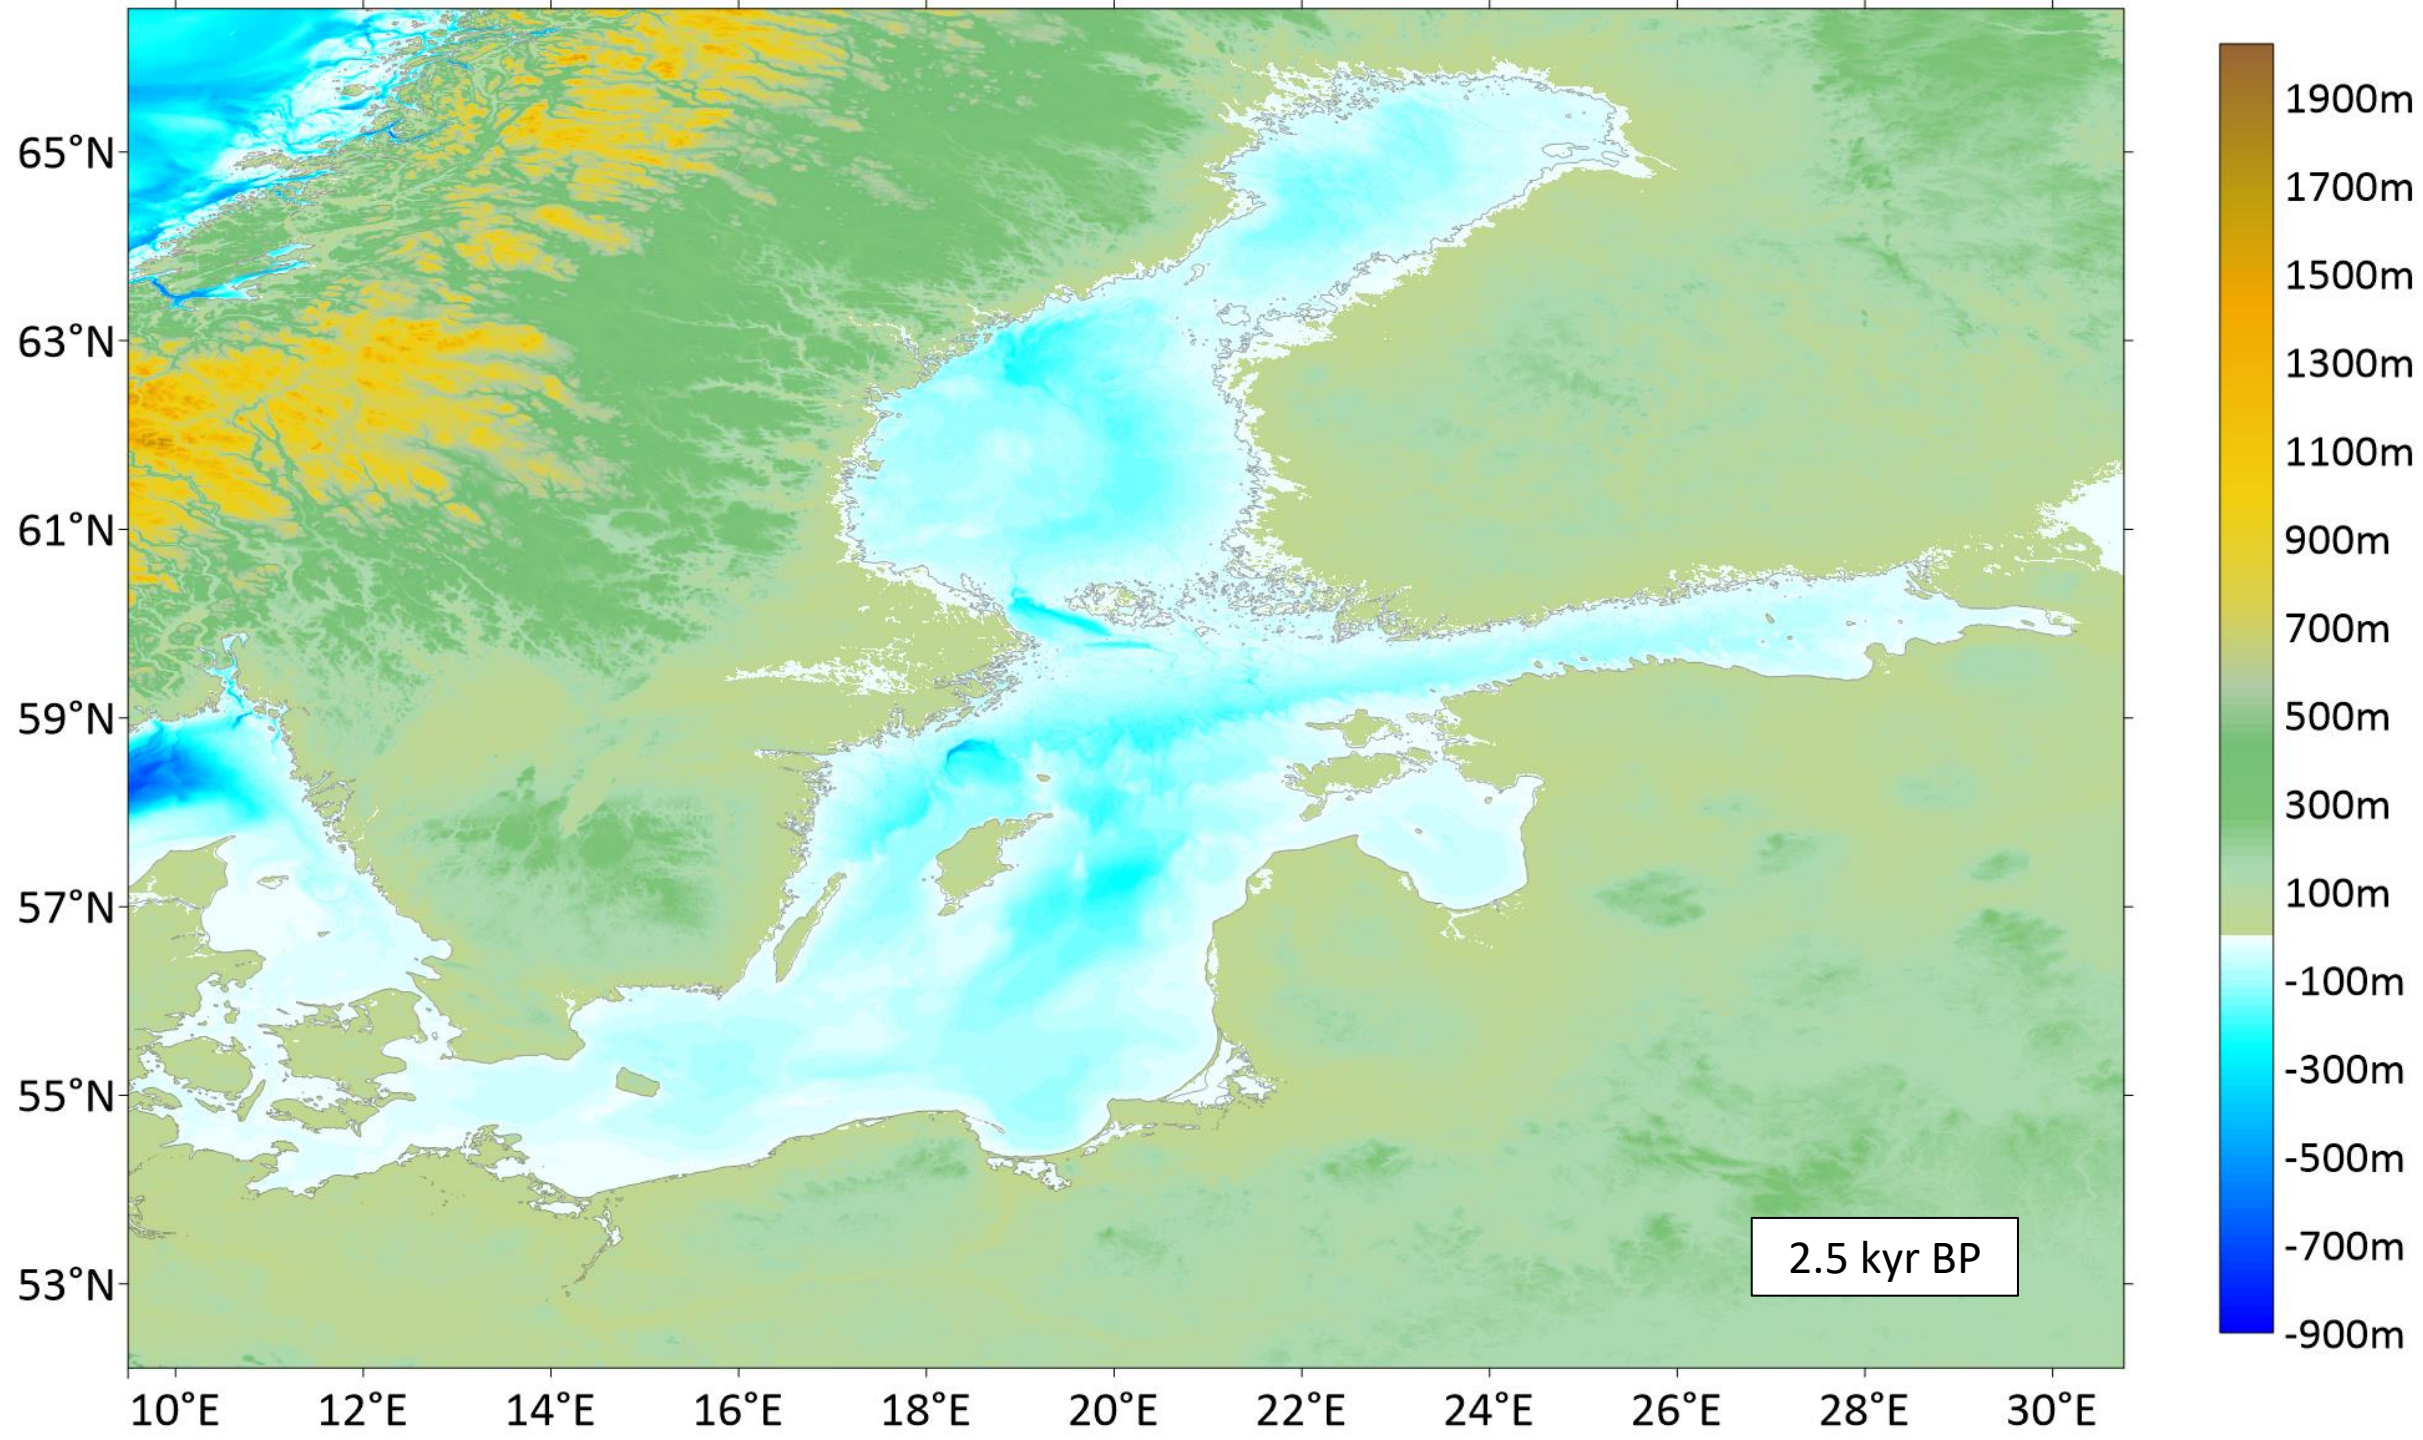



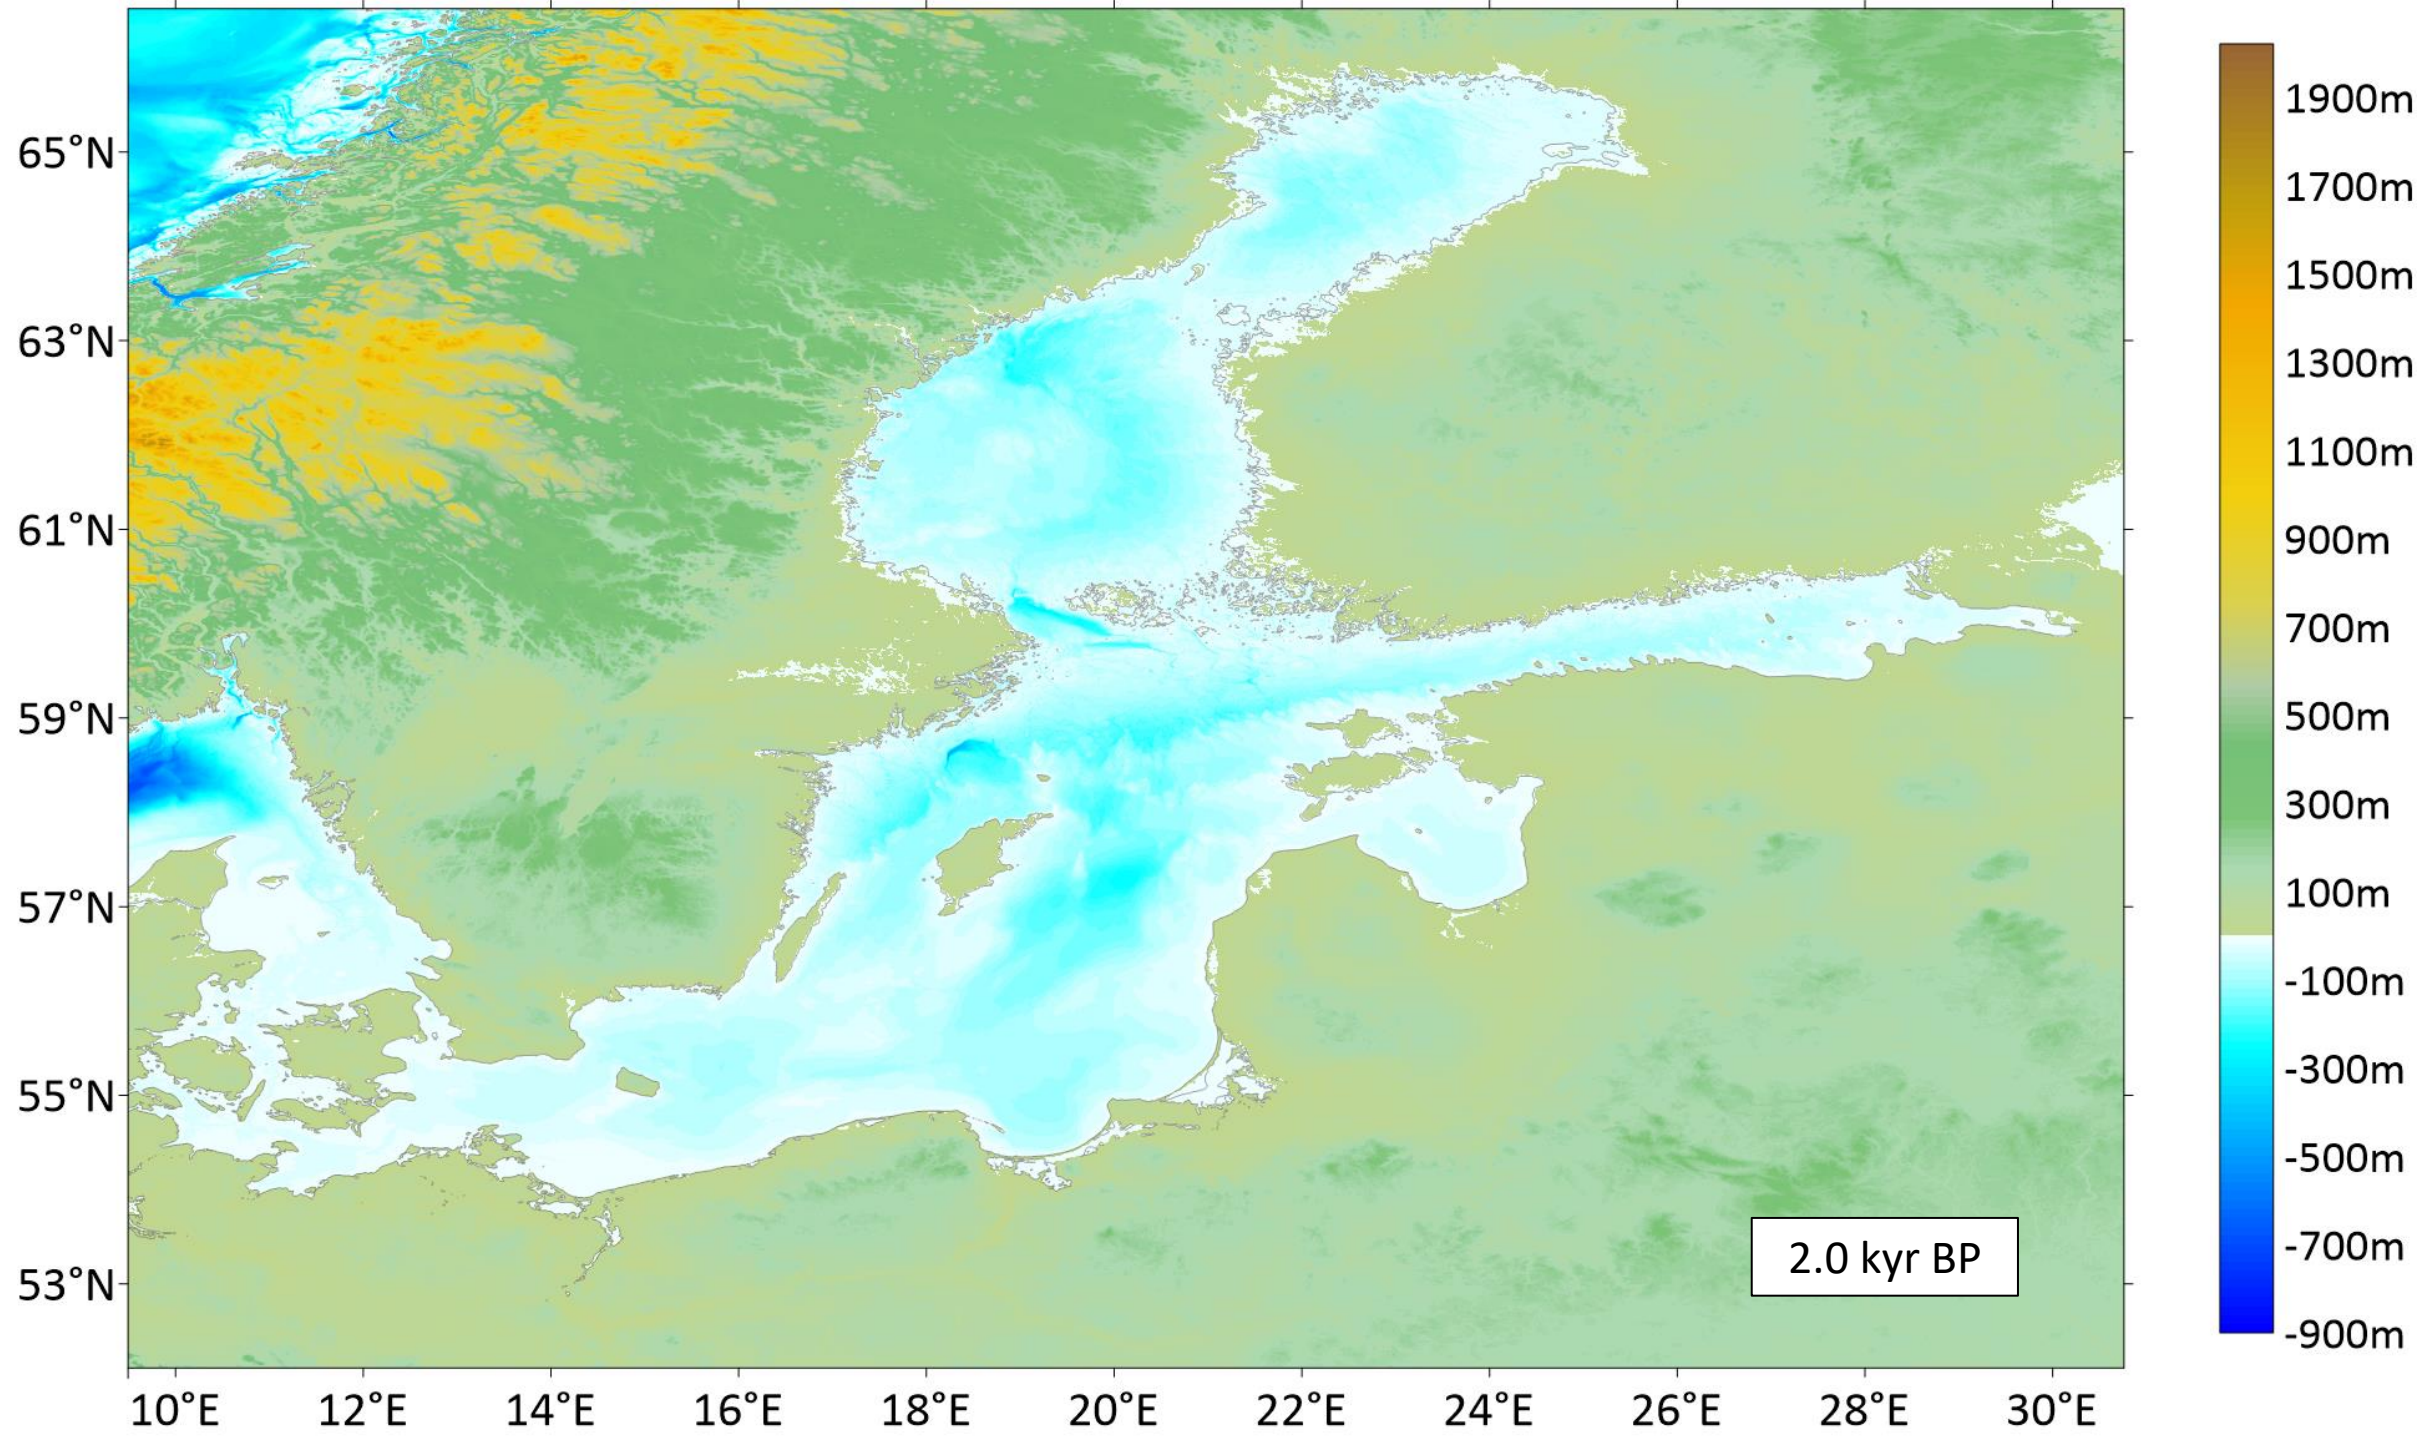



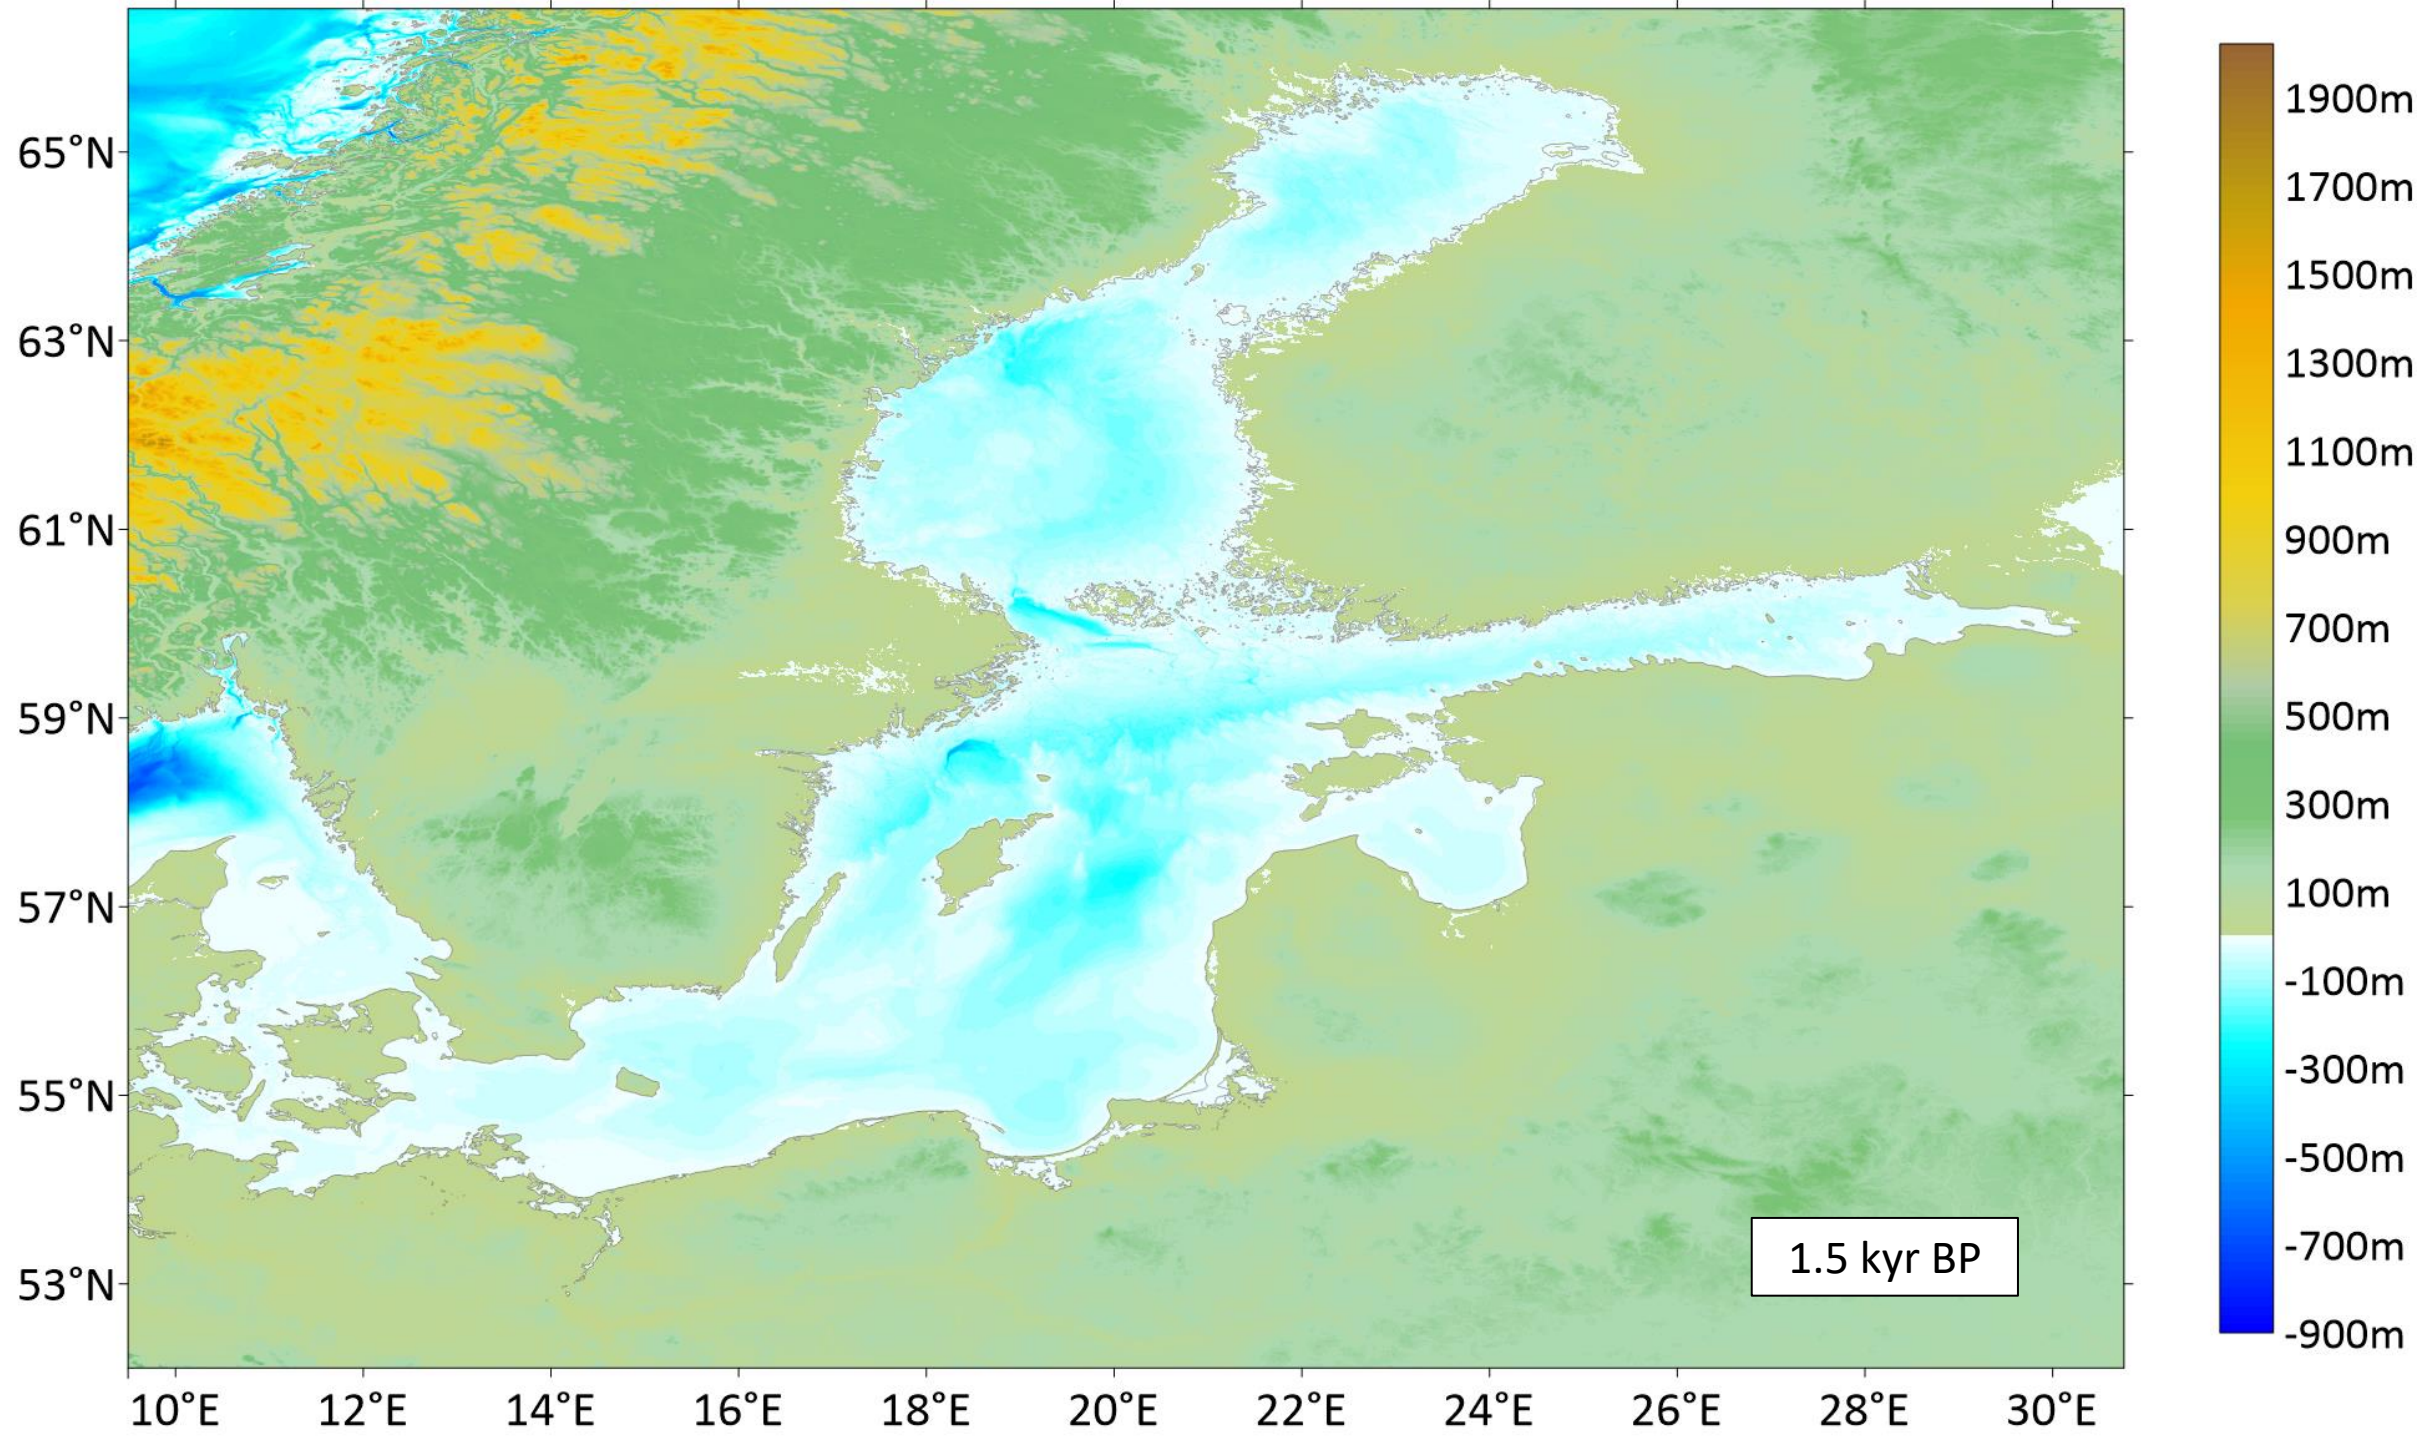



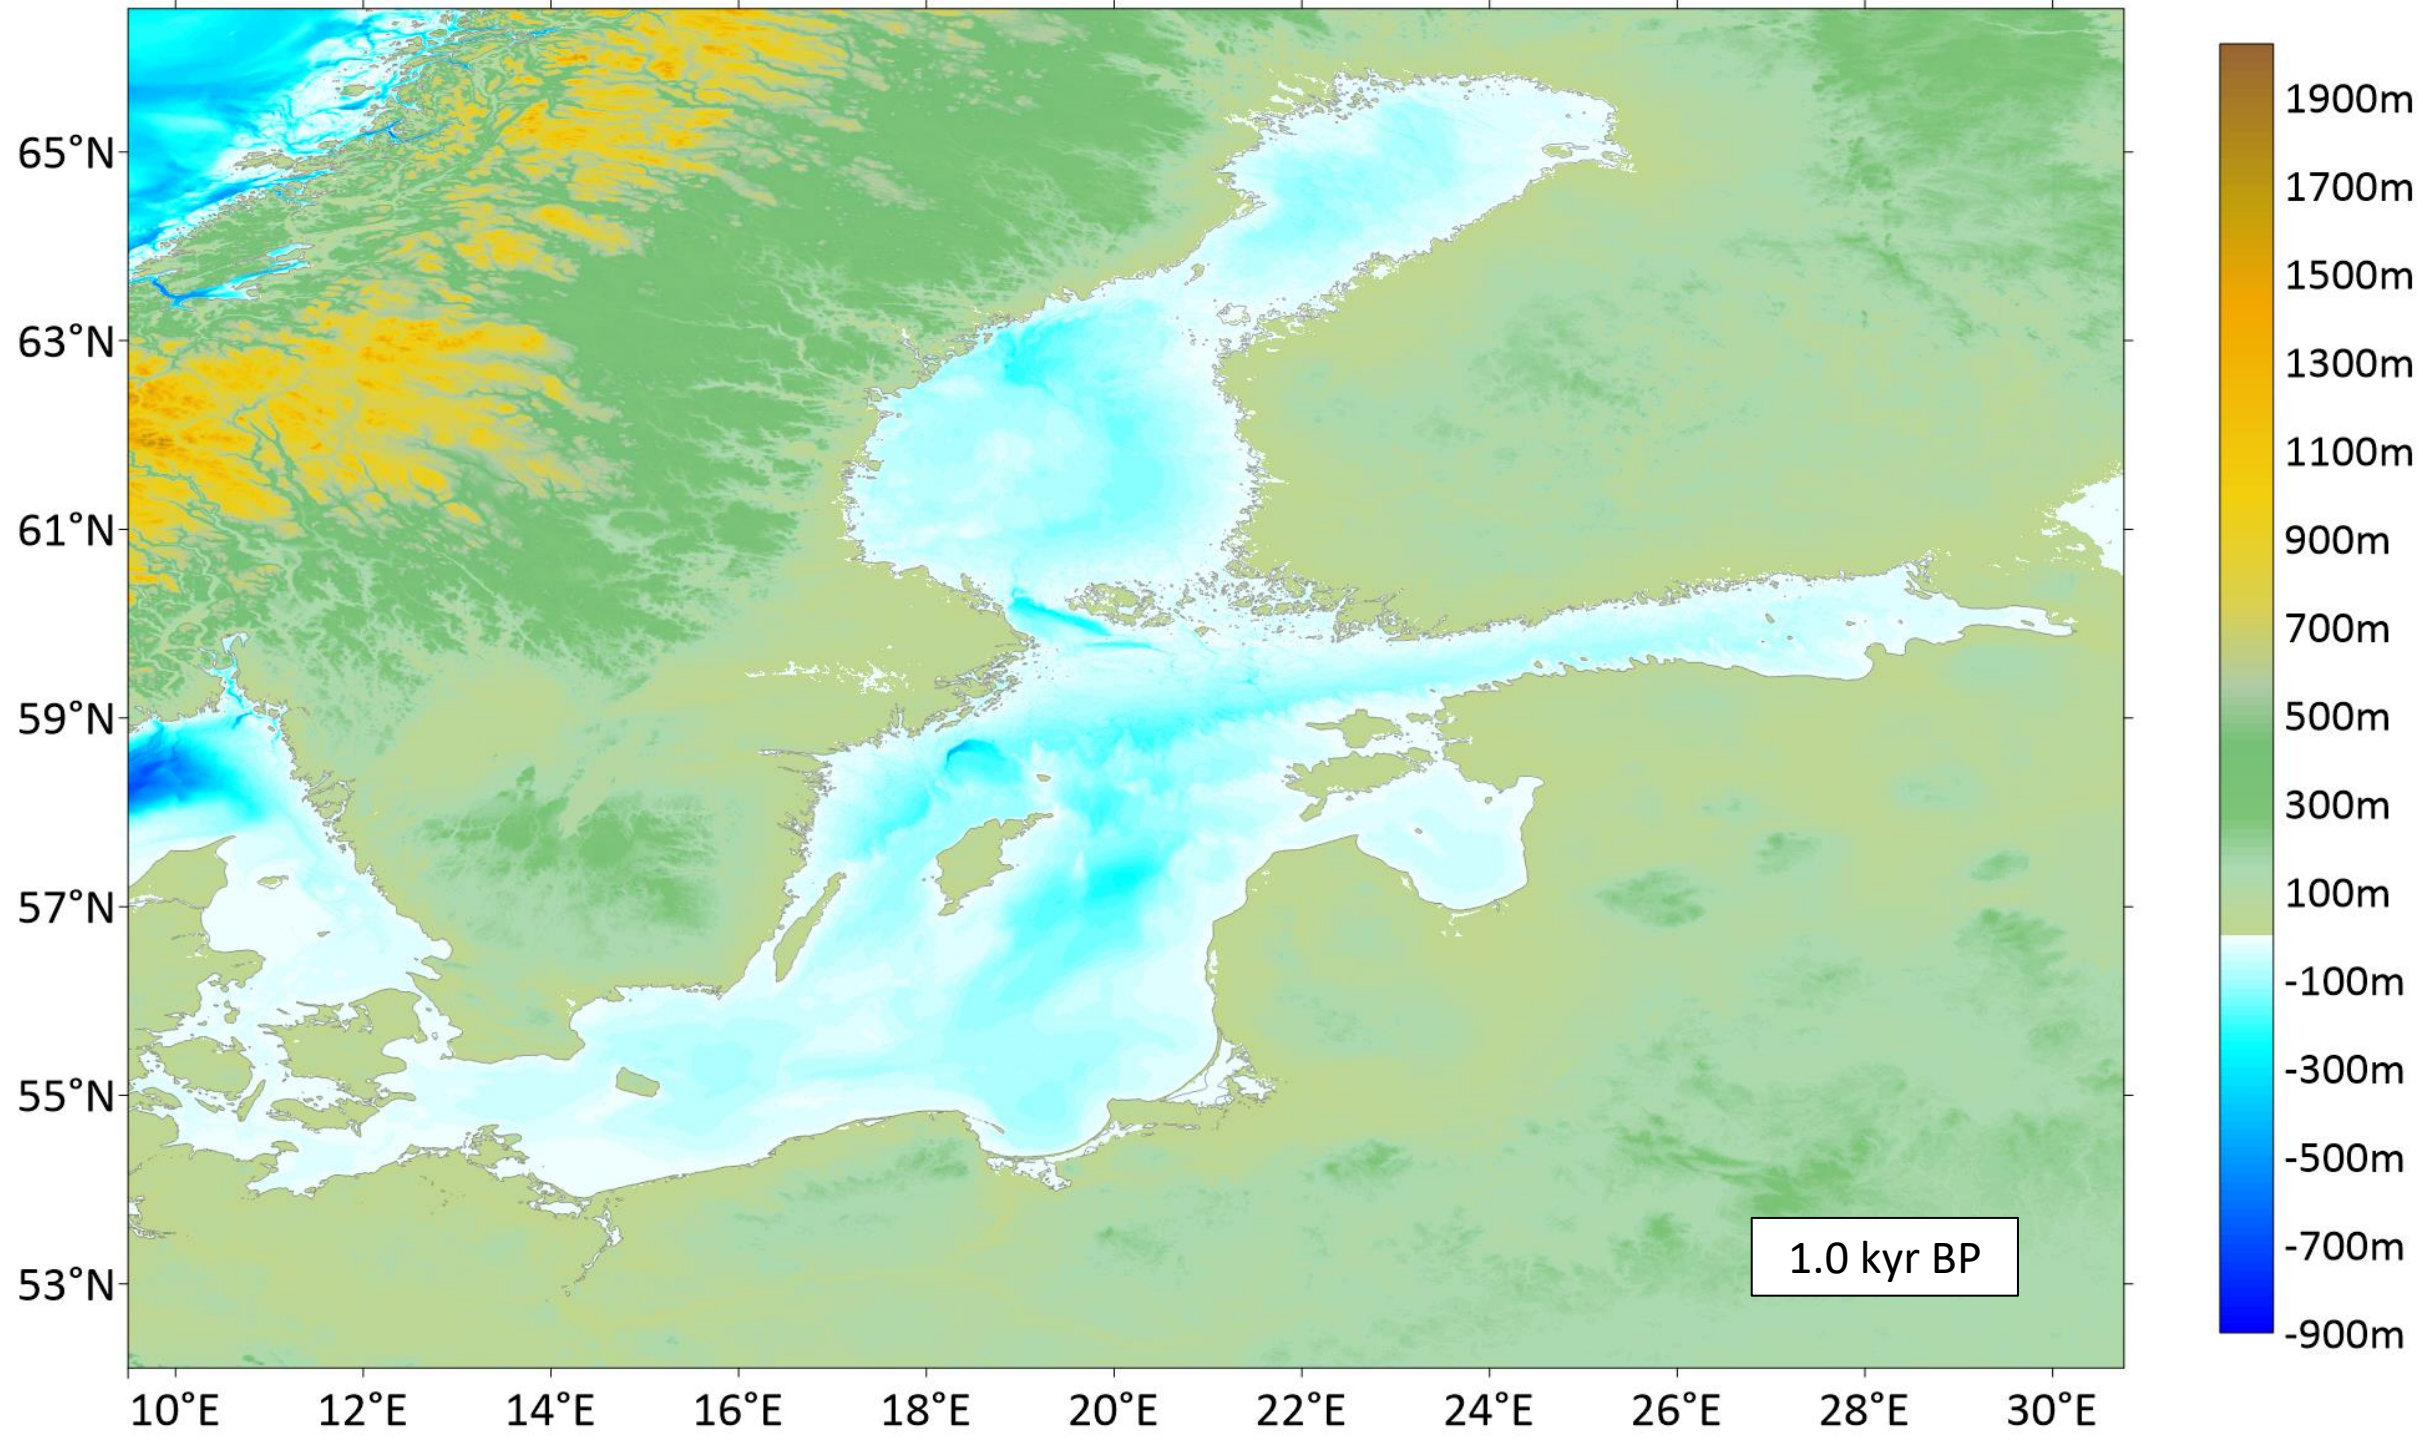



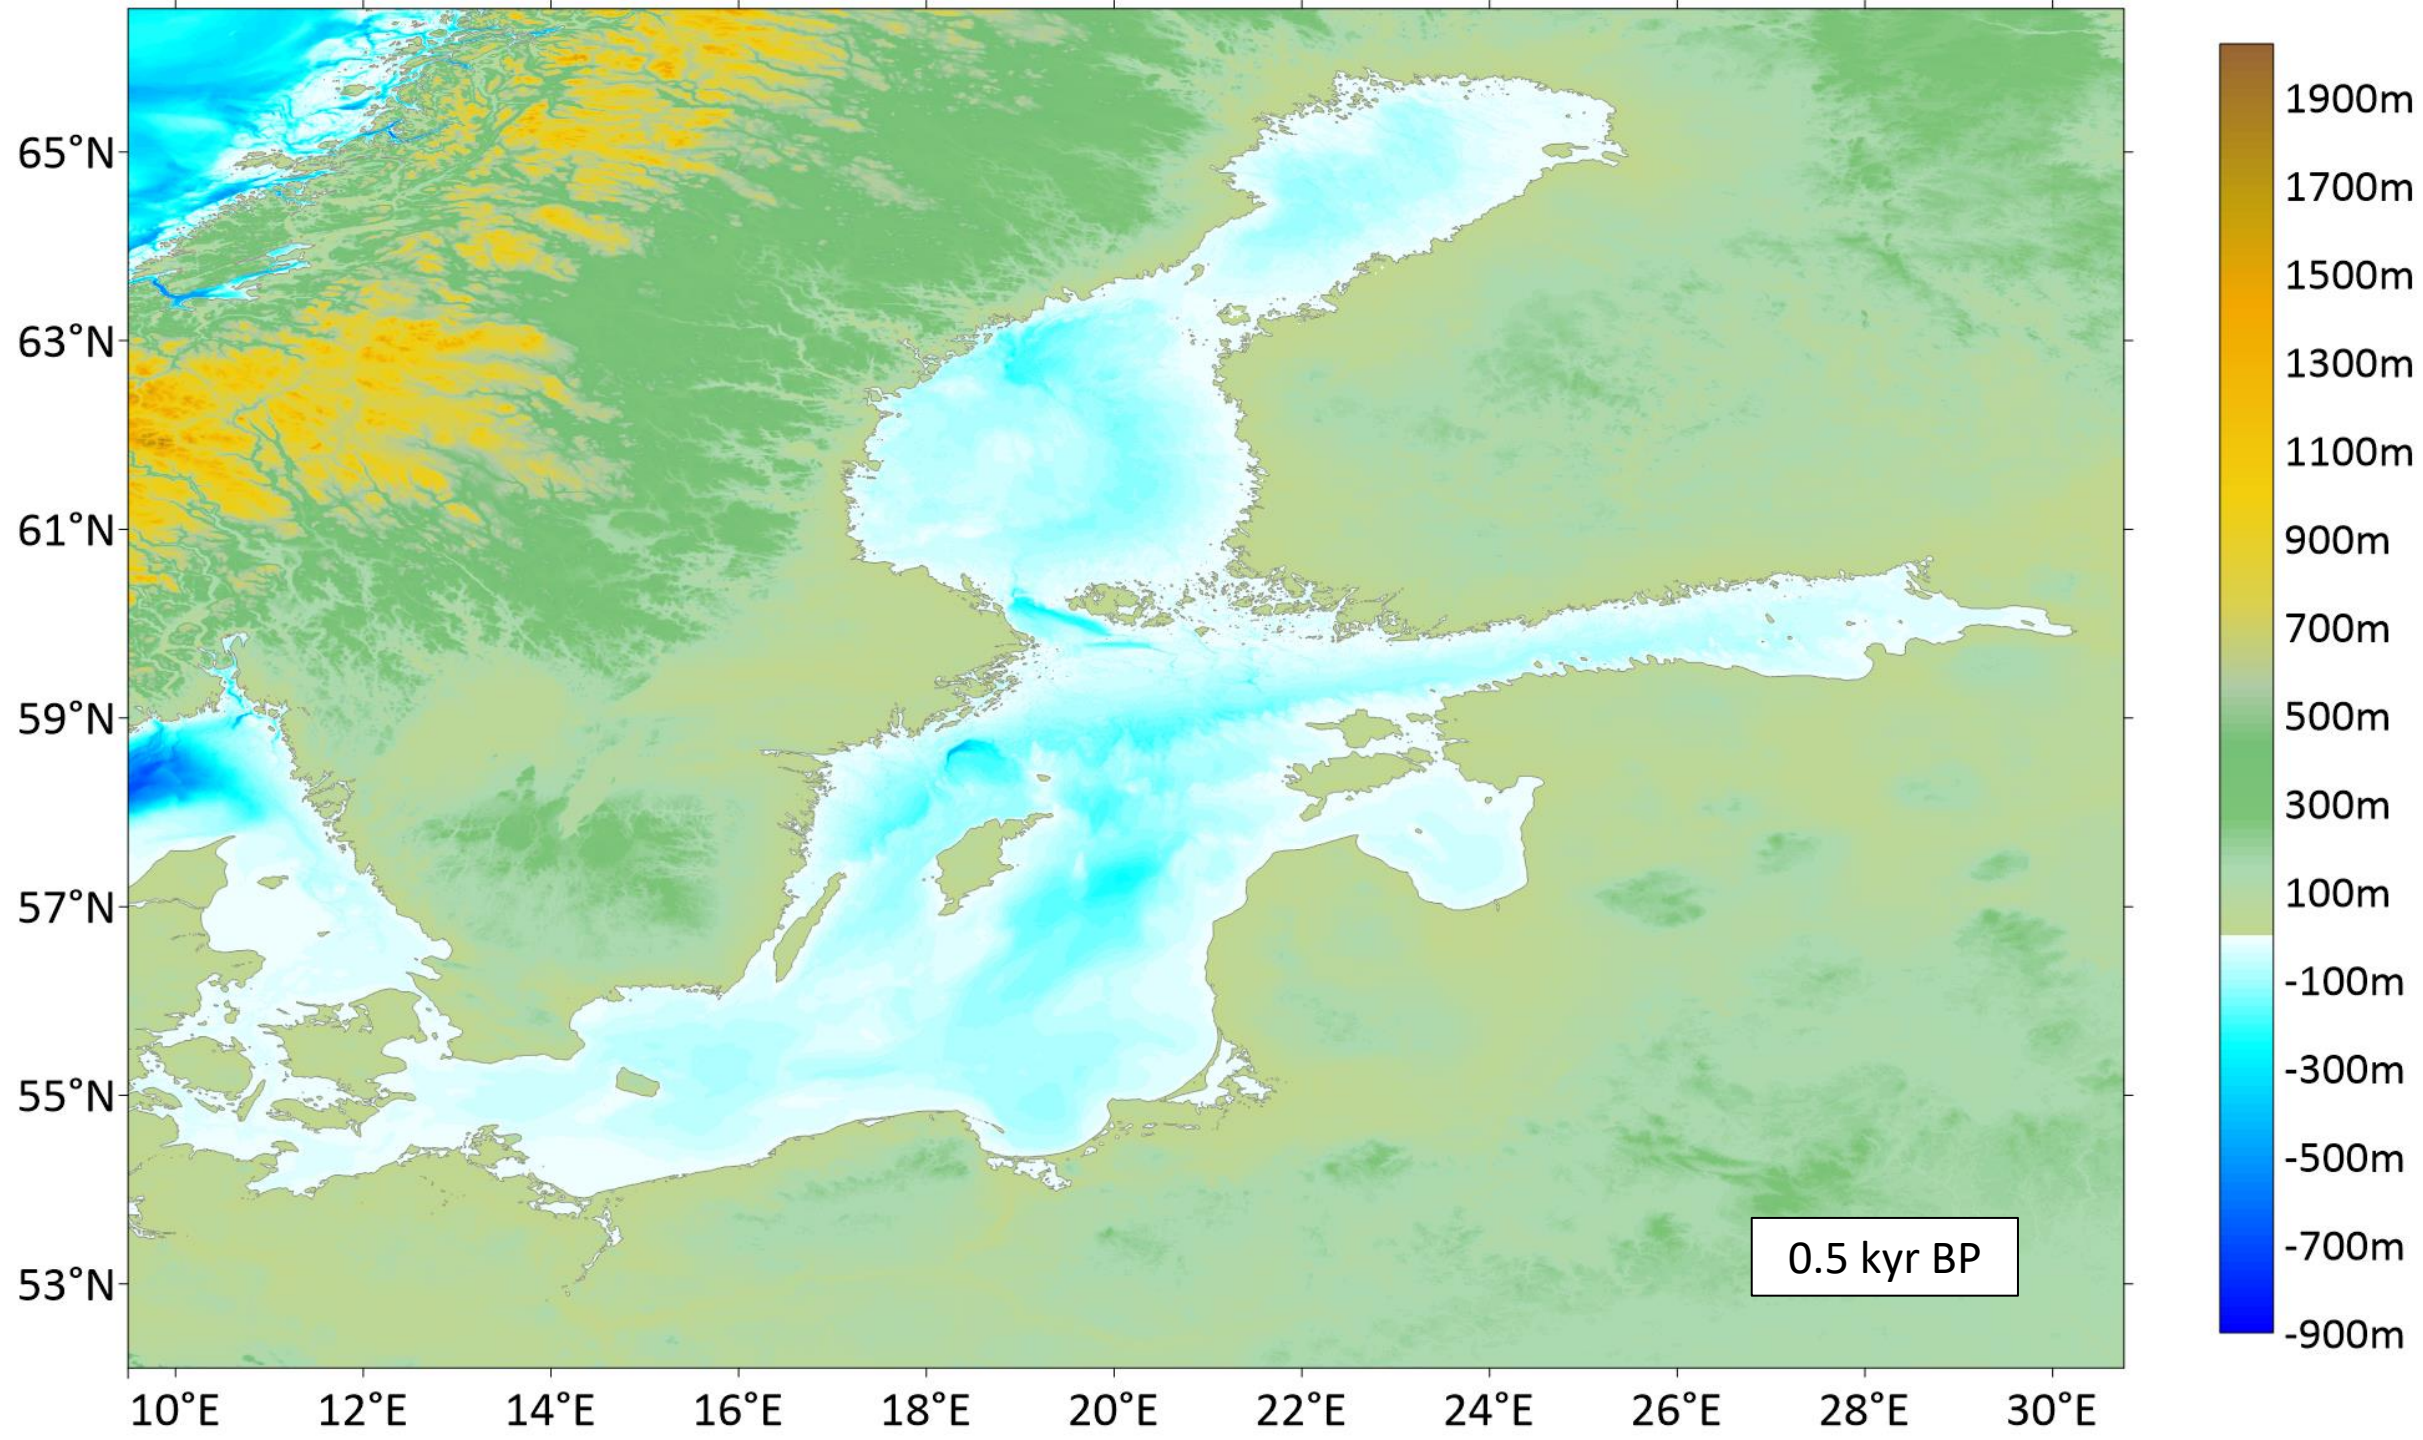

Supplement: Supplementary file 1 [file esd-16-585-2025-supplement.zip]
